# Supplementary material for: Sedimentary Provenance Changes Constrain the Eocene Initial Uplift of the Central Pamir, NW Tibetan Plateau
Source: Frontiers journal article supplement (doi:10.3389/feart.2021.741194), 2021-09-10
Supplement: Data_Sheet_1.XLS [file Data_Sheet_1.XLS]

## Sheet: Sheet1
Grains	Pb	Th	U		207Pb/235U	207Pb/235U	206Pb/238U	206Pb/238U			207Pb/206Pb	207Pb/206Pb	207Pb/235U	207Pb/235U	206Pb/238U	206Pb/238U
	Total	232	238		Ratio	1sigma	Ratio	1sigma	rho		Age (Ma)	1sigma	Age (Ma)	1sigma	Age (Ma)	1sigma
	ppm	ppm	ppm
KLY-1-1	113.842	268.129	435.082		0.549169	0.0166259	0.07562	0.0008989	0.392641		298.21	66.66	444.452	10.9014	469.926	5.39327
KLY-1-2	277.382	498.043	547.046		0.900384	0.0205799	0.107877	0.00124375	0.504414		616.685	50.76	651.933	11.0049	660.408	7.2458
KLY-1-3	131.743	292.571	438.951		0.590278	0.0173687	0.0794241	0.00119412	0.51096		361.165	66.66	471.045	11.0944	492.684	7.13638
KLY-1-4	82.8438	153.403	73.8909		0.877694	0.0462968	0.108393	0.00180868	0.316338		564.85	118.5	639.737	25.0393	663.41	10.5254
KLY-1-5	22.1602	27.7678	50.0439		1.14484	0.0647845	0.131069	0.00200981	0.270975		705.565	112.948	774.802	30.674	793.958	11.4627
KLY-1-6	42.447	93.9039	226.869		0.522051	0.0183953	0.0689639	0.000899716	0.370245		409.31	79.6225	426.52	12.2752	429.91	5.43072
KLY-1-7	84.3879	191.516	261.6		0.602817	0.0269662	0.0774296	0.00080201	0.231547		435.23	90.73	479.02	17.0862	480.762	4.80556
KLY-1-8	197.64	440.881	753.192		0.665124	0.0156589	0.0821217	0.000903058	0.467089		550.035	56.47	517.743	9.55517	508.775	5.38671
KLY-1-9	178.877	381.155	600.655		0.653548	0.0159523	0.0835749	0.000836321	0.409968		475.97	55.55	510.66	9.80189	517.426	4.98329
KLY-1-10	80.5881	173.871	226.274		0.748928	0.0242943	0.0887687	0.00109334	0.379691		638.905	66.655	567.602	14.1099	548.251	6.48023
KLY-1-11	122.719	287.58	457.253		0.57926	0.0179052	0.0744648	0.000910751	0.395678		472.265	37.96	463.986	11.5165	462.999	5.4699
KLY-1-12	180.654	391.315	681.7		0.622657	0.0177342	0.0764135	0.000829468	0.381125		561.145	57.3975	491.511	11.1023	474.68	4.97412
KLY-1-13	378.808	581.242	576.346		1.73207	0.0397717	0.164338	0.00168325	0.446069		1102.78	43.9825	1020.52	14.7976	980.838	9.33444
KLY-1-14	14.3525	26.5298	89.2718		0.553837	0.0326203	0.0775048	0.00118397	0.259361		283.395	135.165	447.507	21.3185	481.212	7.08811
KLY-1-15	86.9616	188.907	319.411		0.598774	0.0203895	0.0772849	0.00105301	0.400123		464.86	106.468	476.456	12.9535	479.896	6.30648
KLY-1-16	59.5602	71.9933	378.989		0.812283	0.0254285	0.103959	0.00136476	0.419353		479.67	66.66	603.734	14.2529	637.571	7.97675
KLY-1-17	93.6231	208.806	314.636		0.627766	0.0234334	0.0811719	0.00125375	0.413779		457.45	71.29	494.703	14.6214	503.114	7.48034
KLY-1-18	73.8564	159.488	281.465		0.58955	0.0234994	0.0797323	0.00116338	0.366058		366.72	52.7725	470.58	15.0145	494.525	6.95093
KLY-1-19	39.5141	103.067	178.825		0.58862	0.0367123	0.0707581	0.00132455	0.300134		611.13	104.615	469.986	23.4672	440.721	7.9779
KLY-1-20	129.126	311.682	444.63		0.625451	0.0221124	0.0788148	0.000953781	0.342292		509.3	74.065	493.258	13.8172	489.045	5.70539
KLY-1-21	56.0675	100.776	247.349		0.671272	0.0249685	0.0879079	0.00129925	0.397347		435.23	84.25	521.485	15.1738	543.152	7.70429
KLY-1-22	126.9	283.363	460.1		0.585423	0.0198555	0.0785635	0.00097371	0.365424		372.275	72.215	467.941	12.7204	487.543	5.82567
KLY-1-23	50.9168	54.3408	61.235		1.73809	0.101408	0.169042	0.00324036	0.328548		1055.56	75.775	1022.76	37.6121	1006.83	17.8765
KLY-1-24	317.722	193.403	311.378		3.89114	0.100234	0.292455	0.00314342	0.417256		1566.67	244.907	1611.85	20.8371	1653.79	15.7039
KLY-1-25	132.336	305.424	413.183		0.598764	0.0190188	0.077601	0.000936247	0.379835		450.045	63.8825	476.449	12.0833	481.787	5.60685
KLY-1-26	158.881	54.6823	67.7784		13.8932	0.350287	0.547975	0.00734669	0.531752		2700	38.275	2742.45	23.9545	2816.74	30.6325
KLY-1-27	130.107	307.746	446.657		0.588135	0.0180252	0.0761471	0.000883497	0.378572		457.45	66.66	469.676	11.5289	473.084	5.29855
KLY-1-28	317.666	173.612	274.325		5.16845	0.110589	0.329387	0.0036697	0.520682		1862.04	37.04	1847.44	18.2472	1835.41	17.8225
KLY-1-29	97.9619	243.833	317.262		0.626263	0.0215595	0.0773933	0.000808522	0.303464		566.7	74.0625	493.765	13.4652	480.545	4.84462
KLY-1-30	192.268	475.489	587.867		0.769439	0.0272543	0.0828479	0.00134066	0.456854		864.81	76.85	579.441	15.6447	513.099	7.98605
KLY-1-31	88.871	91.5944	127.665		1.84084	0.0589904	0.176978	0.00236246	0.416564		1087.96	58.335	1060.16	21.0969	1050.44	12.9518
KLY-1-32	10.7281	11.902	45.1193		1.0297	0.0663222	0.123058	0.00203951	0.257317		635.2	135.167	718.778	33.1821	748.14	11.7139
KLY-1-33	121.161	241.126	351.569		0.710899	0.0217542	0.0884099	0.000770085	0.284644		546.33	68.505	545.28	12.916	546.126	4.57057
KLY-1-34	99.4245	214.491	339.919		0.633761	0.0196187	0.0785986	0.000859127	0.3531		546.33	66.655	498.436	12.1977	487.752	5.14146
KLY-1-35	173.424	435.723	677.762		0.673022	0.0175921	0.0821855	0.000748544	0.348445		588.915	57.3975	522.548	10.6828	509.154	4.46743
KLY-1-36	116.404	254.234	405.32		0.640579	0.0199637	0.0820676	0.00112154	0.438505		475.97	64.8075	502.665	12.3606	508.452	6.68721
KLY-1-37	173.476	382.327	510.09		0.717211	0.0194811	0.0858079	0.000834464	0.358024		620.39	59.2475	549.019	11.5252	530.697	4.96247
KLY-1-38	126.302	280.717	656.211		0.56579	0.0158206	0.0744557	0.000930953	0.44716		433.38	60.18	455.288	10.264	462.944	5.59103
KLY-1-39	442.301	544.484	194.663		1.91951	0.059192	0.184396	0.00246623	0.433721		1075.93	57.4125	1087.9	20.5998	1090.94	13.4361
KLY-1-40	133.451	310.061	417.323		0.611658	0.0192345	0.0776331	0.000922028	0.37768		487.08	66.66	484.605	12.1227	481.979	5.52172
KLY-1-41	65.8196	35.1011	68.4347		5.16215	0.158851	0.330184	0.00451521	0.444388		1846.61	53.09	1846.4	26.2052	1839.27	21.9044
KLY-1-42	101.415	187.376	329.171		0.732931	0.0253063	0.0911945	0.00107988	0.342958		550.035	74.9875	558.272	14.8327	562.598	6.3868
KLY-1-43	39.4436	81.2196	200.762		0.610007	0.025018	0.0749364	0.000866575	0.281966		575.96	92.58	483.565	15.7815	465.827	5.20295
KLY-1-44	80.6549	177.846	271.111		0.62359	0.019269	0.0804414	0.00094467	0.38005		464.86	104.618	492.095	12.0553	498.757	5.64277
KLY-1-45	91.0847	199.292	356.305		0.623827	0.0191094	0.0797955	0.000990401	0.405181		475.97	66.66	492.243	11.9539	494.902	5.91876
KLY-1-46	176.264	538.491	636.05		0.637923	0.0315465	0.0804482	0.00397706	0.999683		857.4	407.842	501.019	19.5593	498.797	23.7303
KLY-1-47	131.407	284.949	490.131		0.61743	0.0184486	0.0787229	0.00102587	0.43613		479.67	62.9575	488.236	11.5863	488.495	6.13623
KLY-1-48	98.8812	209.152	353.123		0.641877	0.0210334	0.0819869	0.00106686	0.397107		479.67	70.3625	503.467	13.0121	507.971	6.36223
KLY-1-49	68.1121	144.705	229.523		0.641167	0.0226726	0.0800278	0.00100745	0.356001		524.11	74.0625	503.029	14.0316	496.289	6.01917
KLY-1-50	59.0349	30.6517	46.3144		9.09802	0.25942	0.358348	0.00514465	0.503494		2678.7	40.7425	2347.91	26.1342	1974.34	24.4386
KLY-1-51	88.7924	177.774	101.845		0.838975	0.0355895	0.103074	0.0015741	0.360006		564.85	90.7275	618.58	19.6551	632.401	9.20546
KLY-1-52	79.4738	166.471	405.805		0.5813	0.0169903	0.0748088	0.000945148	0.432261		461.155	64.8075	465.297	10.9144	465.062	5.6743
KLY-1-53	16.4	36.5708	77.0622		0.573045	0.0309472	0.0753607	0.0010865	0.266963		416.715	122.21	459.982	19.9785	468.371	6.51809
KLY-1-54	163.65	352.14	611.739		0.645956	0.0183086	0.0771892	0.000838719	0.383361		633.35	61.1	505.987	11.2997	479.323	5.02597
KLY-1-55	131.477	294.369	496.287		0.614041	0.0159625	0.0772847	0.000829037	0.412644		509.3	57.4025	486.106	10.0474	479.895	4.96768
KLY-1-56	44.1719	70.7698	148.31		0.667209	0.0548465	0.0748892	0.00253391	0.411609		753.71	161.87	519.014	33.4051	465.544	15.1986
KLY-1-57	119.827	302.246	444.742		0.585403	0.0190409	0.0757352	0.000867474	0.352148		455.6	74.0675	467.928	12.1991	470.616	5.2046
KLY-1-58	103.469	253.777	342.009		0.596113	0.0185383	0.0759201	0.000919972	0.389652		498.19	75.9175	474.764	11.7977	471.724	5.51793
KLY-1-59	114.324	247.399	408.714		0.62081	0.0199897	0.079784	0.0010402	0.404906		461.155	70.365	490.355	12.5273	494.834	6.21587
KLY-1-60	220.19	587.227	742.194		0.671316	0.0235854	0.0791816	0.00137129	0.492933		638.905	96.2825	521.512	14.3333	491.236	8.19558
KLY-1-61	71.9975	159.937	234.365		0.605495	0.0232126	0.0773191	0.00108649	0.366544		500.04	54.625	480.715	14.6843	480.101	6.50647
KLY-1-62	64.3744	177.73	162.637		0.664671	0.0305117	0.0829802	0.00156182	0.410013		542.63	99.985	517.467	18.6143	513.887	9.30085
KLY-1-63	187.84	457.587	740.757		0.613007	0.0171787	0.0738584	0.000876814	0.423627		609.28	64.8025	485.455	10.819	459.359	5.26939
KLY-1-64	34.6946	50.3086	136.88		0.926256	0.0317686	0.110899	0.00172393	0.453236		631.5	77.765	665.663	16.7522	677.967	10.0104
KLY-1-65	63.1957	113.865	177.514		0.734228	0.0326054	0.0868897	0.00112052	0.290399		655.57	98.1325	559.032	19.0941	537.116	6.65223
KLY-1-66	85.7358	147.43	179.923		0.827579	0.0287327	0.103891	0.001346	0.373166		524.11	84.245	612.268	15.969	637.169	7.86779
KLY-1-67	72.1521	168.256	338.304		0.590571	0.0174086	0.0764717	0.000965047	0.42811		455.6	66.66	471.232	11.1179	475.028	5.78484
KLY-1-68	80.5966	180.197	314.032		0.586881	0.0189326	0.0745997	0.00100496	0.41759		498.19	74.065	468.874	12.1185	463.808	6.03385
KLY-1-69	93.4155	209.387	325.37		0.591562	0.0210494	0.0764032	0.0011108	0.408586		442.64	74.0675	471.864	13.4329	474.618	6.65733
KLY-1-70	123.366	286.112	404.428		0.577935	0.0158681	0.0749257	0.000793744	0.385836		455.6	60.18	463.133	10.2158	465.763	4.76679
KLY-1-71	65.9275	151.068	222.547		0.571892	0.0219239	0.0762439	0.000889644	0.304374		383.385	88.88	459.238	14.1655	473.664	5.33487
KLY-1-72	178.939	459.234	763.417		0.564686	0.0129773	0.0692397	0.000639893	0.402138		566.7	51.8425	454.572	8.42712	431.573	3.86493
KLY-1-73	86.6473	189.906	326.306		0.560277	0.0182616	0.0735466	0.000839566	0.350233		413.01	74.0675	451.707	11.8881	457.488	5.04746
KLY-1-74	114.578	247.49	566.341		0.556991	0.0129023	0.0719542	0.000846826	0.508067		450.045	55.55	449.566	8.41968	447.918	5.0983
KLY-1-75	111.054	302.635	358.849		0.552195	0.0167228	0.0744004	0.000898505	0.398776		353.76	74.9925	446.434	10.9436	462.612	5.39682
KLY-1-76	165.737	462.943	668.944		0.578126	0.0143717	0.0718348	0.000890777	0.498824		600.025	57.4	463.256	9.25229	447.2	5.3629
KLY-1-77	116.708	272.331	426.123		0.543337	0.0164923	0.0708568	0.000825073	0.383619		433.38	63.8825	440.623	10.8546	441.316	4.97255
KLY-1-78	220.116	538.378	877.189		0.555033	0.0126988	0.0714182	0.000795768	0.487006		450.045	49.995	448.289	8.29747	444.694	4.79392
KLY-1-79	83.3232	217.343	288.036		0.575075	0.0211231	0.073495	0.00126757	0.46955		500.04	83.325	461.292	13.6208	457.178	7.61586
KLY-1-80	95.1905	223.673	319.106		0.554346	0.0171341	0.0725572	0.000838749	0.373999		416.715	70.365	447.84	11.1971	451.544	5.04704
KLY-1-81	628.998	597.753	529.833		5.34785	0.124321	0.334144	0.00324444	0.417679		1900	40.7425	1876.55	19.9269	1858.44	15.7088
KLY-1-82	185.191	487.763	890.206		0.662908	0.0252261	0.0835546	0.000844486	0.265598		501.89	86.1	516.391	15.4073	517.305	5.03188
KLY-1-83	219.458	791.09	1002.75		0.590688	0.0197832	0.0726278	0.000849068	0.349061		566.7	74.9875	471.307	12.6323	451.968	5.10867
KLY-1-84	310.524	883.89	805.708		0.904242	0.0230123	0.109137	0.00115046	0.414214		605.575	55.545	653.992	12.2787	667.734	6.69631
KLY-1-85	330.358	1208.99	1531.88		0.594963	0.0147722	0.0746235	0.000740539	0.399683		520.41	53.6975	474.032	9.40981	463.951	4.44938
KLY-1-86	344.887	1274.83	1780.03		0.615743	0.0144343	0.0748708	0.000755689	0.430561		583.36	15.7375	487.175	9.07699	465.434	4.53912
KLY-1-87	314.368	1188.24	1302.6		0.834331	0.0199674	0.0970688	0.00109809	0.472687		687.05	54.625	616.012	11.0608	597.208	6.46045
KLY-1-88	232.96	704.386	733.578		0.841309	0.0306854	0.0978108	0.00126042	0.353305		687.05	79.6225	619.868	16.9266	601.567	7.40837
KLY-1-89	765.606	1842.06	871.031		1.37169	0.0544967	0.143426	0.00197455	0.346518		905.555	111.11	876.887	23.3391	864.004	11.1419
KLY-1-90	465.414	1785.93	1770.28		0.620957	0.0151584	0.0782396	0.000736675	0.385708		522.26	51.8475	490.447	9.5012	485.606	4.41212
KLY-1-91	403.825	620.299	684.914		2.76984	0.0580717	0.235032	0.00248653	0.504612		1327.78	39.1925	1347.45	15.6681	1360.82	12.9996
KLY-1-92	174.007	215.774	249.05		2.56953	0.0720504	0.222531	0.00265481	0.425463		1301.85	61.2675	1292.01	20.5141	1295.23	14.0163
KLY-1-93	446.252	1700.84	2119.74		0.577939	0.0134975	0.0730321	0.000695971	0.408045		501.89	46.29	463.136	8.69114	454.397	4.18835
KLY-1-94	167.383	700.818	775.344		0.553587	0.0214014	0.0712643	0.000907543	0.329412		457.45	83.325	447.344	13.9907	443.768	5.46646
KLY-1-95	373.697	1684.72	1867.5		0.531832	0.0158492	0.0674066	0.000714046	0.355461		501.89	66.66	433.025	10.5098	420.512	4.31833
KLY-1-96	241.28	880.929	1077.85		0.607501	0.0157306	0.0780758	0.000809138	0.400228		477.82	55.55	481.983	9.94169	484.627	4.84536
KLY-1-97	373.463	1313.16	789.978		0.844083	0.0219268	0.10162	0.00105914	0.40122		616.685	55.545	621.396	12.0807	623.895	6.20696
KLY-1-98	332.943	1472.01	1092.77		0.5873	0.0174468	0.07712	0.000782528	0.341568		420.42	64.8075	469.142	11.1651	478.909	4.69046
KLY-1-99	452.863	1054.9	1116.5		1.81977	0.0650531	0.169022	0.00306456	0.507192		1129.33	56.0175	1052.6	23.4362	1006.72	16.9078
KLY-1-100	79.6725	219.359	205.025		1.13576	0.0473871	0.130672	0.00178056	0.326588		731.49	90.7325	770.495	22.5349	791.698	10.1607
KLY-1-101	255.203	947.608	1156.92		0.588344	0.0177146	0.0767915	0.000855825	0.370146		438.935	64.8075	469.81	11.3289	476.943	5.13003
KLY-1-102	136.911	518.8	609.916		0.608963	0.0214659	0.0766712	0.00089747	0.33207		520.41	74.065	482.906	13.5507	476.223	5.37962
KLY-1-103	232.556	1211.27	617.742		0.620946	0.0290501	0.0756527	0.00119173	0.336714		590.77	92.5775	490.44	18.2004	470.122	7.14661
KLY-1-104	278.657	234.942	326.394		4.40006	0.108411	0.317941	0.00347188	0.443203		1628.09	42.2775	1712.35	20.418	1779.67	17.0091
KLY-1-105	345.28	1186.39	1767.47		0.582973	0.0141985	0.0762064	0.000656283	0.353594		433.38	49.995	466.37	9.11304	473.439	3.9394
KLY-1-106	217.435	862.136	903.768		0.620702	0.0188316	0.0770816	0.000884365	0.378162		542.63	62.9525	490.287	11.8028	478.68	5.2993
KLY-1-107	214.737	844.339	935.361		0.571266	0.016879	0.0754869	0.000825998	0.370339		416.715	64.8075	458.833	10.912	469.128	4.95747
KLY-1-108	367.394	1354.52	1419.77		0.651681	0.016232	0.0817648	0.000834367	0.409688		524.11	49.07	509.512	9.98477	506.648	4.97965
KLY-1-109	355.863	1288.5	1683.32		0.597965	0.0146034	0.0766023	0.000791012	0.422826		472.265	51.845	475.942	9.285	475.81	4.74334
KLY-1-110	200.912	716.246	803.313		0.644897	0.0217424	0.0789075	0.000811852	0.30517		598.17	79.6175	505.334	13.4258	489.599	4.85797
KLY-1-111	481.736	1931.74	2151.33		0.640315	0.0156606	0.0762397	0.000653312	0.350367		631.5	47.215	502.501	9.70022	473.639	3.92153
KLY-1-112	336.046	1279.33	1460.63		0.596098	0.0155116	0.0762117	0.000740545	0.373415		472.265	53.6975	474.754	9.87321	473.471	4.44316
KLY-1-113	199.736	736.269	882.733		0.574997	0.0147496	0.0763628	0.000743363	0.379493		398.2	57.4025	461.241	9.51407	474.376	4.45942
KLY-1-114	1233.07	506.432	1037.53		12.3393	0.212527	0.499875	0.00522444	0.606814		2637.97	24.695	2630.57	16.276	2613.26	22.4988
KLY-1-115	245.101	925.283	1088		0.592328	0.0162172	0.0749592	0.00065303	0.318196		501.89	61.105	472.353	10.3462	465.964	3.92423
KLY-1-116	439.532	1931.73	1999.93		0.598749	0.0135693	0.0764083	0.000796008	0.459691		475.97	46.29	476.44	8.62407	474.649	4.77403
KLY-1-117	238.853	896.053	1086.34		0.578596	0.0154169	0.0749146	0.000751012	0.376236		450.045	57.4025	463.559	9.92143	465.697	4.51094
KLY-1-118	411.621	2065.25	1906.04		0.629	0.215971	0.0736076	0.00983547	0.389159		2445.36	1527.28	495.473	134.619	457.854	59.057
KLY-1-119	307.872	1320.38	1189.7		0.602328	0.0167455	0.0758795	0.000807512	0.382788		509.3	61.105	478.71	10.6165	471.481	4.84511
KLY-1-120	156.048	681.361	589.287		0.581024	0.0237168	0.072895	0.000904293	0.303913		524.11	90.725	465.119	15.235	453.574	5.4389
KLY-3-1	132.181	214.267	291.965		1.17651	0.0683352	0.135479	0.00364062	0.462653		849.995	138.885	789.687	31.8842	819.046	20.6735
KLY-3-2	169.448	287.477	1338.94		0.643105	0.064691	0.0847879	0.00242465	0.284284		372.275	158.315	504.227	39.9783	524.638	14.4114
KLY-3-3	257.765	172.417	1587.74		1.03319	0.101028	0.122789	0.00495775	0.412918		594.47	122.205	720.524	50.4563	746.595	28.4674
KLY-3-4	514.365	261.132	161.696		5.57798	0.245782	0.330687	0.0121604	0.834562		2061.11	68.055	1912.71	37.9614	1841.71	58.9185
KLY-3-5	139.529	247.123	497.889		0.787913	0.0393839	0.0925691	0.00199754	0.431708		766.67	101.07	589.988	22.3703	570.713	11.79
KLY-3-6	295.693	648.969	938.428		0.572118	0.0287933	0.0763461	0.000992071	0.258196		455.6	112.953	459.383	18.5994	474.276	5.94719
KLY-3-7	42.3208	900.186	1072.96		0.0454132	0.00430881	0.00680814	0.000163647	0.25334		235.25	237.015	45.0954	4.18515	43.7394	1.04807
KLY-3-8	1608.2	661.375	832.086		6.37255	0.195781	0.386957	0.00766353	0.644627		1987.04	39.655	2028.49	26.9992	2108.7	35.6374
KLY-3-9	210.414	947.526	2157.31		0.263341	0.00883219	0.0389841	0.000871324	0.666411		327.835	85.1775	237.355	7.10052	246.533	5.4078
KLY-3-10	188.545	800.294	482.506		0.312836	0.0163736	0.0441461	0.000691616	0.299327		364.87	120.358	276.376	12.6652	278.481	4.27259
KLY-3-11	157.316	421.478	433.104		0.619941	0.0399782	0.0780234	0.00167783	0.333466		679.64	154.61	489.81	25.0607	484.314	10.0366
KLY-3-12	253.241	437.069	535.905		0.906738	0.0368285	0.10756	0.00141057	0.322881		705.565	76.845	655.322	19.6171	658.561	8.21775
KLY-3-13	17.8102	389.597	424.619		0.0463301	0.00602615	0.00714241	0.000218609	0.235314		264.88	322.185	45.9856	5.848	45.8793	1.39947
KLY-3-14	15.6456	336.128	369.874		0.0505518	0.00549288	0.00777585	0.000239733	0.283737		176.01	266.63	50.0742	5.30911	49.9325	1.53373
KLY-3-15	69.2364	216.233	421.93		0.331164	0.0188134	0.0477782	0.000684454	0.252168		305.615	129.613	290.454	14.3518	300.866	4.21421
KLY-3-16	140.376	447.332	961.185		0.292236	0.0198711	0.0422802	0.000708824	0.246555		231.55	120.353	260.318	15.6148	266.951	4.38639
KLY-3-17	30.1371	597.728	880.968		0.0486416	0.00452624	0.00781645	0.000184718	0.253962		105.645	225.895	48.2262	4.38281	50.1922	1.18184
KLY-3-18	313.925	453.943	876.304		0.82528	0.0392465	0.104316	0.0031684	0.63869		598.17	100.91	610.99	21.8363	639.653	18.4987
KLY-3-19	170.221	513.477	483.063		0.281371	0.0206854	0.0426916	0.00118973	0.379073		188.97	-30.5525	251.745	16.3924	269.495	7.35691
KLY-3-20	191.525	714.292	1287.79		0.283383	0.0133888	0.039739	0.000490818	0.261418		344.5	97.2125	253.338	10.5943	251.215	3.04611
KLY-3-21	13.894	213.036	306.83		0.0574992	0.00507123	0.00871973	0.000306394	0.398406		472.265	256.293	56.7669	4.86941	55.9673	1.9583
KLY-3-22	565.806	913.123	1023.36		0.92052	0.0456064	0.107226	0.0019307	0.363431		750.005	86.255	662.635	24.1164	656.618	11.2464
KLY-3-23	729.103	977.598	713.286		1.15266	0.0496139	0.125878	0.00245947	0.45393		877.775	72.22	778.497	23.4083	764.306	14.0882
KLY-3-24	141.732	103.245	518.338		1.55347	0.0703977	0.165926	0.00545956	0.726082		1029.32	116.67	951.873	28.001	989.627	30.1907
KLY-3-25	36.0053	711.976	1159.19		0.0470492	0.00364729	0.00731015	0.000158042	0.278887		100.09	172.195	46.6831	3.53712	46.9529	1.01173
KLY-3-26	272.75	754.193	1209.59		0.398942	0.0159621	0.0557865	0.00106953	0.479164		344.5	80.5475	340.881	11.588	349.95	6.53308
KLY-3-27	470.64	467.981	1070.7		1.28793	0.0439523	0.154632	0.00218117	0.413335		650.015	67.5825	840.378	19.5144	926.874	12.188
KLY-3-28	154.397	265.942	525.116		0.339615	0.0182025	0.0489751	0.000661833	0.252133		333.39	95.3575	296.88	13.7983	308.226	4.07066
KLY-3-29	141.719	164.455	328.764		1.34233	0.0483346	0.15101	0.00320022	0.588539		920.37	96.295	864.24	20.9609	906.624	17.93
KLY-3-30	545.324	331.438	647.918		3.73108	0.0864689	0.282199	0.00368977	0.564181		1572.22	35.1825	1578.06	18.5889	1602.43	18.5709
KLY-3-31	201.957	250.741	308.763		1.1194	0.0502423	0.130609	0.00248939	0.424655		722.23	99.99	762.688	24.0761	791.338	14.2002
KLY-3-32	121.312	288.233	274.254		0.545849	0.0230358	0.0734542	0.00108219	0.349106		405.605	94.435	442.274	15.1339	456.933	6.50357
KLY-3-33	1082.25	909.573	1194.73		6.34995	0.232386	0.352661	0.0182549	1.41443		2291.05	86.885	2025.38	32.1333	1947.29	87.0044
KLY-3-34	410.969	419.276	1051.65		1.21268	0.0296594	0.14004	0.00206351	0.602475		722.23	50.92	806.422	13.6215	844.889	11.6772
KLY-3-35	350.281	586.623	748.263		0.747658	0.0239659	0.0956747	0.00147486	0.480908		494.485	65.735	566.865	13.9295	589.011	8.68317
KLY-3-36	173.478	469.552	767.643		0.463369	0.0178926	0.0587671	0.000801408	0.353161		505.595	83.3225	386.598	12.4179	368.123	4.8835
KLY-3-37	50.2843	705.313	1025.25		0.0681431	0.00588051	0.0099812	0.000315668	0.366484		187.12	185.155	66.9358	5.59023	64.0239	2.01511
KLY-3-38	132.496	382.33	879.776		0.379169	0.0155679	0.053578	0.000736204	0.334667		253.77	88.875	326.426	11.4637	336.451	4.50819
KLY-3-39	149.781	418.087	398.557		0.49395	0.0227276	0.0627255	0.000794407	0.275251		501.89	104.457	407.599	15.4496	392.18	4.82347
KLY-3-40	320.978	300.384	963.476		1.41409	0.0319868	0.144822	0.00206823	0.631352		970.06	48.92	894.881	13.4676	871.872	11.6556
KLY-3-41	559.564	694.951	2983.04		0.795898	0.0154317	0.0986484	0.00090549	0.473409		600.025	37.96	594.512	8.73431	606.483	5.32313
KLY-3-42	1097.5	741.312	355.878		3.77405	0.0902573	0.271163	0.00374751	0.577879		1635.18	40.74	1587.24	19.227	1546.7	19.023
KLY-3-43	2163.87	1309.26	1973.78		6.18343	1.19836	0.352582	0.0539517	0.789567		2224.38	168.06	2002.11	169.394	1946.92	257.136
KLY-3-44	503.478	558.187	1465.53		1.18771	0.0219106	0.133709	0.00127937	0.51867		750.005	38.885	794.898	10.1837	808.993	7.28777
KLY-3-45	633.795	1075	1378.26		0.87799	0.0189377	0.102612	0.000921694	0.416439		666.37	50.92	639.897	10.2484	629.699	5.39939
KLY-3-46	144.789	327.574	399.685		0.556522	0.0201453	0.0752221	0.000936662	0.34399		372.275	76.845	449.26	13.1452	467.541	5.62136
KLY-3-47	230.84	730.282	2194.66		0.300217	0.008512	0.0410723	0.000484894	0.416392		320.43	65.735	266.57	6.64978	259.476	3.00578
KLY-3-48	1436.69	521.214	746.049		9.96026	0.179927	0.461547	0.00628484	0.753794		2416.66	35.335	2431.11	16.7506	2446.39	27.7519
KLY-3-49	549.456	710.219	741.686		1.25773	0.0329515	0.137003	0.00176843	0.492686		809.26	48.1425	826.888	14.8301	827.693	10.0364
KLY-3-50	207.154	260.981	739.408		0.949796	0.0235792	0.112692	0.00120778	0.431713		640.45	56.4725	677.996	12.2878	688.363	7.00716
KLY-3-51	333.492	577.999	770.219		0.843009	0.0225663	0.100336	0.00112195	0.417724		655.57	62.955	620.805	12.4398	616.377	6.58147
KLY-3-52	783.301	876.62	629.201		2.83864	0.573342	0.227056	0.0180148	0.392822		1294.44	289.66	1365.81	151.661	1319.05	94.6448
KLY-3-53	133.72	562.678	765.016		0.31526	0.0151898	0.0432395	0.000574427	0.275722		331.54	107.395	278.25	11.7281	272.881	3.55257
KLY-3-54	148.143	2370.35	3011.33		0.0679623	0.0040557	0.0101026	0.000147959	0.245421		109.35	122.2	66.7639	3.85629	64.7987	0.944915
KLY-3-55	327.758	696.494	1335.67		0.562147	0.0184845	0.0718469	0.00110109	0.466076		483.375	74.0675	452.923	12.0187	447.273	6.62668
KLY-3-56	474.083	1146.9	1388.91		0.583655	0.0155974	0.0732267	0.000820153	0.419111		527.815	62.955	466.808	10.0055	455.566	4.93245
KLY-3-57	148.525	523.539	882.785		0.361013	0.0127639	0.0478494	0.000573405	0.33894		390.79	71.29	312.971	9.52491	301.304	3.53136
KLY-3-58	111.004	253.859	555.691		0.515439	0.0200803	0.0702671	0.00105857	0.386702		344.5	83.325	422.1	13.4574	437.765	6.38036
KLY-3-59	212.086	374.456	767.332		0.693386	0.0240058	0.0908453	0.00121303	0.385681		431.53	75.9175	534.833	14.3989	560.534	7.17485
KLY-3-60	492.207	1078.27	1370.1		0.638575	0.01606	0.0786342	0.0007183	0.363212		561.145	53.6925	501.424	9.95783	487.965	4.30097
KLY-3-61	11.971	280.792	262.021		0.0515347	0.0176374	0.00789315	0.000327247	0.12114		error		51.0237	17.0311	50.6828	2.09323
KLY-3-62	224.089	349.775	672.023		0.885539	0.0265106	0.104264	0.00111311	0.356608		733.34	60.18	643.97	14.2829	639.352	6.50723
KLY-3-63	1020.85	2540.19	2493.04		0.568506	0.0142281	0.0700225	0.000829632	0.473408		566.7	50.7625	457.048	9.21591	436.291	5.00372
KLY-3-64	539.172	786.504	517.579		1.04419	0.0293479	0.121023	0.00160114	0.470721		716.675	61.105	726.002	14.5859	736.451	9.21587
KLY-3-65	25.6215	614.11	469.964		0.050613	0.00657109	0.00767944	0.000285849	0.286703		257.47	337	50.1334	6.35084	49.3157	1.82885
KLY-3-66	431.413	307.333	742.037		2.27893	0.0456541	0.209528	0.00220226	0.524657		1166.36	38.885	1205.78	14.1614	1226.3	11.756
KLY-3-67	21.1009	464.705	432.738		0.0590468	0.00893588	0.0088975	0.000417848	0.31032		64.91	401.8	58.2518	8.56755	57.1033	2.67004
KLY-3-68	555.127	730.392	3523.18		0.655414	0.0135652	0.0768225	0.000670037	0.421405		664.83	52.7725	511.805	8.32779	477.129	4.01945
KLY-3-69	797.533	1255.21	1844.91		0.928626	0.0283308	0.107664	0.00118735	0.361485		675.94	55.55	666.912	14.9225	659.169	6.91934
KLY-3-70	356.697	811.532	1044.4		0.60496	0.0151793	0.076555	0.000803489	0.418293		501.89	55.55	480.377	9.60879	475.527	4.81814
KLY-3-71	29.6874	623.257	530.096		0.0529706	0.0101952	0.0081391	0.000383856	0.245037		error		52.4093	9.83133	52.2557	2.45468
KLY-3-72	162.593	227.198	291.444		1.10945	0.0392907	0.120676	0.00183402	0.429143		816.665	68.515	757.91	18.9196	734.454	10.5572
KLY-3-73	276.006	433.124	580.165		0.966421	0.0291243	0.11282	0.00120409	0.354147		664.83	61.105	686.617	15.0459	689.106	6.98506
KLY-3-74	142.276	50.2619	94.0598		10.3143	0.253634	0.477624	0.00697262	0.593663		2418.21	38.73	2463.39	22.8236	2516.91	30.4497
KLY-3-75	520.206	649.962	844.983		2.46054	0.331704	0.207662	0.0152084	0.543259		1253.7	141.205	1260.52	97.3315	1216.35	81.1841
KLY-3-76	2115.05	546.423	756.181		22.981	0.326314	0.682497	0.00617889	0.637593		3139.82	21.3	3226.14	13.9896	3353.93	23.7433
KLY-3-77	107.501	105.277	185.997		1.81364	0.0680712	0.169531	0.00258779	0.406694		1153.71	49.8425	1050.39	24.5758	1009.53	14.2742
KLY-3-78	200.874	735.372	1077.5		0.332891	0.015571	0.0441027	0.000612219	0.296775		466.71	111.1	291.771	11.8635	278.213	3.7829
KLY-3-79	426.037	1768.67	1610.03		0.328024	0.00896685	0.0449042	0.000503853	0.410471		316.725	59.255	288.056	6.85869	283.16	3.11222
KLY-3-80	1050.75	274.865	634.782		17.4034	0.389248	0.552608	0.00827683	0.66966		3016.36	26.545	2957.34	21.5702	2836.01	34.3994
KLY-3-81	469.442	996.61	1400.27		0.574174	0.0153826	0.0711354	0.00093237	0.489233		546.33	62.9525	460.71	9.92712	442.992	5.61638
KLY-3-82	4273.51	1764.54	1446.76		9.80683	0.182226	0.435218	0.00493889	0.610718		2479.62	28.0875	2416.79	17.2002	2329.2	22.2191
KLY-3-83	1438.05	934.595	1754.74		2.84625	0.0489723	0.233286	0.00226115	0.563331		1383.64	32.8725	1367.82	12.9618	1351.7	11.8416
KLY-3-84	325.869	883.25	2093.79		0.37347	0.00867786	0.0493475	0.000474963	0.414226		394.495	56.475	322.222	6.41914	310.515	2.92263
KLY-3-85	698.252	569.921	756.638		2.13317	0.514388	0.187863	0.0131176	0.289565		931.48	328.692	1159.61	166.703	1109.79	71.1903
KLY-3-86	777.861	581.862	945.399		2.25583	0.0583456	0.199368	0.00309613	0.600429		1213.88	37.805	1198.61	18.2143	1171.92	16.6533
KLY-3-87	649.068	220.024	839.433		6.18125	0.107273	0.360933	0.00402524	0.642614		2009.26	27.775	2001.8	15.2287	1986.59	19.0968
KLY-3-88	104.524	207.24	323.933		0.769788	0.0462952	0.0872358	0.00148667	0.28337		744.45	125.912	579.641	26.564	539.169	8.81954
KLY-3-89	309.561	315.037	694.128		1.30755	0.224965	0.137844	0.0294573	1.24208		1464.82	258.332	849.051	98.9922	832.456	166.89
KLY-3-90	2920.28	3441	4477.06		7.85722	0.57918	0.397241	0.032357	1.10502		2298.46	40.28	2214.79	66.4137	2156.32	149.289
KLY-3-91	228.033	351.764	714.546		0.928221	0.0590615	0.102703	0.00202288	0.309552		821.91	163.727	666.698	31.1045	630.229	11.8307
KLY-3-92	1697.94	3245.42	741.721		0.800096	0.021524	0.0922244	0.00121485	0.489661		701.86	62.03	596.883	12.1479	568.679	7.17675
KLY-3-93	379.868	482.556	820.615		1.14806	0.0303655	0.121491	0.00123114	0.383131		879.63	89.045	776.328	14.3634	739.138	7.08791
KLY-3-94	245.055	564.925	798.596		0.526494	0.0210258	0.0663608	0.00114184	0.430859		516.705	94.43	429.48	13.9889	414.193	6.90635
KLY-3-95	123.909	280.211	485.729		0.558455	0.0214314	0.0693409	0.00106238	0.399235		575.96	92.58	450.521	13.9666	432.183	6.40871
KLY-3-96	1001.8	400.701	964.219		5.7106	0.112856	0.348896	0.00411537	0.596856		1927.79	31.175	1932.97	17.1268	1929.33	19.6951
KLY-3-97	256.391	266.549	553.023		1.29306	0.0434774	0.132282	0.00208557	0.468896		949.995	68.5175	842.652	19.2607	800.871	11.8816
KLY-3-98	602.786	217.112	389.107		8.20026	0.186442	0.404766	0.00516351	0.561079		2305.55	4.6325	2253.37	20.6336	2190.95	23.7246
KLY-3-99	312.534	242.445	475.133		2.43201	0.765565	0.21162	0.0562917	0.84503		2603.39	710.653	1252.12	226.499	1237.44	299.5
KLY-3-100	20.1615	403.275	414.796		0.0512385	0.00487319	0.00770279	0.000230231	0.314267		457.45	310.145	50.7376	4.70711	49.4651	1.47306
KLY-3-101	264.299	541.167	613		2.38446	0.425119	0.205725	0.0246372	0.671712		2294.45	379.163	1237.95	127.544	1206	131.724
KLY-3-102	493.972	463.271	809.734		1.27561	0.0535965	0.131927	0.00195781	0.353196		927.775	94.445	834.895	23.9217	798.85	11.1582
KLY-3-103	180.759	204.996	678.214		0.949644	0.0302663	0.108593	0.00155045	0.447976		716.675	63.7275	677.917	15.7696	664.574	9.02292
KLY-3-104	49.7044	575.488	756.935		0.0864071	0.00985638	0.0123984	0.000279667	0.197746		168.6	244.41	84.1509	9.21219	79.4339	1.78129
KLY-3-105	58.8504	1240.87	906.95		0.0501222	0.00347298	0.00727985	0.000147976	0.293356		264.88	180.532	49.6588	3.35826	46.759	0.947357
KLY-3-106	349.16	284.465	1873.98		4.04454	1.25866	0.285552	0.0289469	0.325745		1483.34	246.298	1643.2	253.35	1619.26	145.157
KLY-3-107	335.454	345.486	598.1		1.0878	0.0399754	0.121072	0.0018201	0.40908		788.89	74.0675	747.435	19.4483	736.733	10.4735
KLY-3-108	157.554	225.107	863.758		0.668786	0.0473787	0.0827026	0.00305126	0.520791		657.42	180.532	519.974	28.83	512.234	18.1693
KLY-3-109	543.797	223.89	421.728		2.38549	0.627642	0.205431	0.0247149	0.457254		1695.99	419.75	1238.26	188.246	1204.43	132.172
KLY-3-110	162.361	420.544	590.014		0.461667	0.0199788	0.0588553	0.0009989	0.39219		487.08	92.585	385.417	13.8812	368.66	6.08466
KLY-3-111	27.3629	549.794	511.34		0.0547483	0.00470134	0.00805816	0.000212544	0.307158		338.945	253.673	54.1221	4.52603	51.7381	1.35948
KLY-3-112	355.536	144.58	118.171		9.58206	0.229151	0.437336	0.00594473	0.568401		2442.9	37.4975	2395.45	22.048	2338.7	26.6919
KLY-3-113	486.325	427.777	796.627		1.66242	0.0389828	0.173153	0.00212999	0.524584		909.26	36.11	994.298	14.8825	1029.46	11.7174
KLY-3-114	422.654	1160.55	1073.56		0.448513	0.0200402	0.0565031	0.00109368	0.4332		522.26	101.835	376.237	14.0502	354.324	6.67597
KLY-3-115	622.68	728.833	745.535		1.35299	0.0316334	0.144711	0.00177698	0.525206		864.81	47.0675	868.848	13.6635	871.246	10.0181
KLY-3-116	295.916	534.173	876.27		0.65176	0.0194369	0.0798387	0.000815154	0.342364		575.96	66.655	509.562	11.9534	495.16	4.87364
KLY-3-117	340.908	837.006	748.343		0.520012	0.0200794	0.0637464	0.000927265	0.376712		583.36	116.65	425.159	13.4164	398.369	5.62344
KLY-3-118	188.832	181.911	271.53		1.36844	0.0413765	0.139841	0.00199191	0.471092		964.81	60.03	875.494	17.7487	843.762	11.2745
KLY-3-119	103.57	288.184	1104.83		0.271939	0.0152204	0.0372291	0.000506534	0.243092		309.32	122.205	244.243	12.1515	235.635	3.1507
KLY-3-120	1128.97	628.407	732.687		3.36226	0.0749884	0.269772	0.00319127	0.530402		1421.91	37.345	1495.65	17.4843	1539.64	16.2229
KLY-7-1	100.964	81.4979	802.228		0.676414	0.0213533	0.0827485	0.000983441	0.376474		572.255	66.655	524.605	12.9384	512.507	5.8617
KLY-7-2	187.221	201.759	128.616		5.15193	0.132252	0.328391	0.00370567	0.439586		1861.12	45.99	1844.71	21.8644	1830.58	18.01
KLY-7-3	207.281	212.752	155.414		5.10142	0.125922	0.333529	0.00386529	0.469502		1817.59	44.755	1836.34	20.9928	1855.47	18.712
KLY-7-4	876.931	500.453	1138.22		5.66108	0.10037	0.354443	0.00361126	0.574654		1884.88	29.01	1925.45	15.3558	1955.78	17.22
KLY-7-5	109.564	604.394	896.524		0.318985	0.00942669	0.0459623	0.000495783	0.365007		216.74	70.36	281.122	7.25939	289.684	3.05958
KLY-7-6	103.01	628.018	800.052		0.319786	0.0113226	0.0463583	0.000622873	0.379476		213.035	83.32	281.738	8.71319	292.125	3.84064
KLY-7-7	429.677	1454.54	2028.84		0.607754	0.0120146	0.0764079	0.000676942	0.448157		509.3	42.5875	482.142	7.59497	474.646	4.06218
KLY-7-8	88.5692	706.635	735.201		0.276145	0.0146375	0.0382875	0.000675453	0.33282		324.13	124.058	247.595	11.6477	242.209	4.19572
KLY-7-9	202.256	492.322	316.111		1.32487	0.0371662	0.14549	0.00154016	0.37736		809.26	57.4025	856.642	16.2427	875.633	8.68036
KLY-7-10	864.111	261.58	847.945		12.0359	0.192215	0.501924	0.00470005	0.58635		2586.73	22.38	2607.21	15.0765	2622.06	20.2227
KLY-7-11	256.97	871.074	1347.95		0.556513	0.0129029	0.0735273	0.00068009	0.398939		405.605	51.845	449.255	8.42268	457.371	4.09133
KLY-7-12	266.794	989.146	1194.51		0.572544	0.0137382	0.0722669	0.000620037	0.357568		505.595	58.3275	459.659	8.87617	449.799	3.73554
KLY-7-13	931.721	530.091	1777.28		3.29293	0.0549753	0.261977	0.00249201	0.569774		1442.6	28.55	1479.38	13.0419	1499.95	12.7554
KLY-7-14	301.091	426.075	816.716		1.499	0.0307353	0.160952	0.00150743	0.456779		855.55	40.74	929.98	12.5042	962.063	8.38641
KLY-7-15	1530.75	1782.38	1346.61		3.96661	0.238788	0.286855	0.0143238	0.829478		1610.8	171.915	1627.39	48.8308	1625.79	71.7597
KLY-7-16	477.493	1053.82	1134.05		1.27464	0.0259698	0.132602	0.00117172	0.433703		909.26	36.11	834.464	11.6066	802.692	6.68312
KLY-7-17	207.19	895.198	812.393		0.54008	0.0193519	0.0724729	0.000986347	0.379828		375.98	78.695	438.477	12.7623	451.037	5.93373
KLY-7-18	339.918	1094.26	1714.86		0.58315	0.0147627	0.0774097	0.000786573	0.401384		383.385	53.6975	466.484	9.47362	480.643	4.71342
KLY-7-19	373.154	675.413	1098.15		1.19832	0.0330141	0.1353	0.0015973	0.428512		738.895	53.6975	799.809	15.2586	818.028	9.08049
KLY-7-20	90.7701	397.447	298.651		0.58619	0.0247969	0.0758575	0.00107048	0.333595		500.04	96.285	468.432	15.8767	471.349	6.41923
KLY-7-21	113.266	429.151	595.081		0.502944	0.0191774	0.0687003	0.000770582	0.294165		324.13	85.1775	413.693	12.9592	428.321	4.65391
KLY-7-22	120.133	405.128	616.611		0.573876	0.0191959	0.0758327	0.000869022	0.342598		405.605	74.065	460.518	12.3881	471.2	5.21341
KLY-7-23	222.161	1690.93	1626.09		0.291743	0.00862126	0.0400115	0.000431252	0.364734		320.43	66.66	259.931	6.7791	252.904	2.67656
KLY-7-24	94.3089	191.796	884.787		0.435543	0.0131436	0.0601585	0.000614956	0.338738		294.505	66.66	367.105	9.30004	376.59	3.74484
KLY-7-25	359.178	301.579	338.091		5.2924	0.109974	0.33748	0.00290275	0.413926		1850.31	36.5775	1867.64	17.7916	1874.54	14.0273
KLY-7-26	483.238	852.158	866.899		1.72222	0.0383601	0.169663	0.00169019	0.447258		1027.78	75	1016.85	14.3249	1010.25	9.33119
KLY-7-27	128.101	718.739	311.078		0.552199	0.0246084	0.0710914	0.000943977	0.29796		483.375	93.51	446.436	16.1006	442.727	5.6864
KLY-7-28	266.76	810.868	1295.85		0.597794	0.021626	0.0741047	0.00118181	0.440837		522.26	115.567	475.833	13.7469	460.838	7.09719
KLY-7-29	30.5386	92.7716	202.257		0.528726	0.0300948	0.0717507	0.00140329	0.343605		387.09	138.875	430.964	19.9912	446.694	8.444
KLY-7-30	276.336	938.2	1295.5		0.673222	0.0557725	0.0858006	0.0103233	1.45233		864.81	305.54	522.669	33.847	530.654	61.2901
KLY-7-31	405.491	426.454	243.833		5.50501	0.113104	0.358781	0.00441154	0.598465		1820.68	36.265	1901.38	17.702	1976.39	20.9567
KLY-7-32	220.125	193.419	239.052		4.63744	0.106365	0.32596	0.0034812	0.465634		1683.34	41.05	1756.03	19.195	1818.77	16.953
KLY-7-33	357.434	1815.75	1222.92		0.555996	0.0137335	0.0693422	0.000667916	0.389956		524.11	51.8475	448.917	8.96713	432.191	4.03322
KLY-7-34	796.161	494.424	725.267		8.14603	0.149186	0.391241	0.00327967	0.457725		2347.22	29.015	2247.37	16.6328	2128.58	15.24
KLY-7-35	64.9298	401.341	760.036		0.248724	0.0127763	0.0352492	0.000471428	0.260362		238.955	122.205	225.539	10.39	223.318	2.93802
KLY-7-36	370.81	1132.9	2175.88		0.575542	0.012063	0.0731962	0.000640386	0.417423		479.67	44.44	461.592	7.7805	455.383	3.85449
KLY-7-37	167.217	788.665	562.337		0.589559	0.0205265	0.0744889	0.000810967	0.312698		505.595	78.6925	470.586	13.1159	463.143	4.87184
KLY-7-38	1061.9	1283.72	1705.85		2.60479	0.048332	0.228413	0.00215552	0.50859		1253.7	33.335	1301.99	13.6427	1326.18	11.3343
KLY-7-39	473.097	1106.71	1648.87		0.918437	0.019206	0.107655	0.000959371	0.426151		664.83	45.21	661.533	10.1752	659.116	5.59475
KLY-7-40	685.824	1048.38	2549.07		1.32602	0.0320478	0.127844	0.00116307	0.376423		1064.82	46.2975	857.144	14.0021	775.554	6.66091
KLY-7-41	226.315	103.421	192.275		6.28112	0.144812	0.361563	0.00409797	0.491605		2034.87	40.7375	2015.82	20.2412	1989.58	19.4319
KLY-7-42	25.5443	51.7169	147.131		0.577762	0.0265472	0.071402	0.00103353	0.315023		568.55	107.392	463.022	17.0876	444.597	6.22318
KLY-7-43	37.2489	92.5752	171.463		0.50188	0.0224852	0.0657407	0.000852932	0.289589		433.38	101.84	412.974	15.2043	410.444	5.16394
KLY-7-44	35.3807	24.211	334.326		0.707932	0.0228245	0.0856421	0.00131955	0.477892		598.17	68.5075	543.518	13.5744	529.713	7.84056
KLY-7-45	32.7451	78.2196	131.336		0.526605	0.0289161	0.0669529	0.000835321	0.227211		509.3	125.907	429.554	19.235	417.772	5.05196
KLY-7-46	291.071	383.88	891.746		0.994931	0.0226737	0.110023	0.000885647	0.353222		781.17	49.995	701.233	11.5504	672.88	5.15618
KLY-7-47	89.8129	215.635	325.948		0.547884	0.018802	0.0674128	0.000819184	0.354099		553.74	75.9125	443.61	12.3374	420.55	4.9525
KLY-7-48	118.061	163.873	117.366		1.27215	0.0491815	0.134964	0.00191092	0.366238		875.925	87.9625	833.354	21.9856	816.121	10.8626
KLY-7-49	41.9076	53.1086	42.466		1.5366	0.0765114	0.148943	0.00289749	0.390693		1072.22	104.48	945.144	30.6337	895.037	16.2642
KLY-7-50	42.8915	103.317	131.478		0.584147	0.0279719	0.0733851	0.00112468	0.320054		520.41	103.69	467.123	17.9318	456.517	6.759
KLY-7-51	120.203	184.033	306.422		0.949575	0.0272249	0.104623	0.00114364	0.381263		794.445	61.875	677.881	14.1868	641.446	6.68309
KLY-7-52	4.01794	176.537	296.665		0.0236919	0.00364884	0.00359505	0.000121493	0.219427		509.3	423.1	23.7758	3.61926	23.1336	0.780487
KLY-7-53	91.8934	430.926	447.922		0.272776	0.0114956	0.0368391	0.000523693	0.33732		366.72	96.2875	244.911	9.17236	233.21	3.25843
KLY-7-54	41.2788	164.025	235.218		0.316559	0.0138147	0.0426942	0.000675352	0.362471		364.87	101.843	279.252	10.6562	269.511	4.17787
KLY-7-55	61.1085	134.794	193.509		0.582233	0.0258372	0.0758044	0.00122276	0.363494		457.45	108.323	465.895	16.5838	471.031	7.33139
KLY-7-56	86.3917	93.4259	240.194		0.727541	0.0686396	0.0934575	0.00862979	0.978743		550.035	308.295	555.109	40.3455	575.953	50.8774
KLY-7-57	15.6594	329.119	343.392		0.0469461	0.00529723	0.00773438	0.000197714	0.226549		33.43	288.85	46.5832	5.13763	49.6672	1.26505
KLY-7-58	65.3506	36.2655	64.1317		4.30715	0.139943	0.290396	0.00385719	0.408808		1746.29	57.56	1694.73	26.7992	1643.51	19.2898
KLY-7-59	118.507	244.23	419.032		0.651398	0.0239506	0.0774516	0.00088757	0.311675		633.35	81.4675	509.339	14.7304	480.894	5.31669
KLY-7-60	64.6286	59.91	610.353		0.686352	0.0415223	0.0803328	0.00182898	0.376341		650.015	139.795	530.606	25.0039	498.109	10.917
KLY-7-61	32.359	50.1721	45.1832		1.03936	0.0646753	0.116902	0.00248813	0.34204		772.225	131.475	723.6	32.2051	712.71	14.3658
KLY-7-62	83.9828	81.1077	206.438		1.57392	0.0477545	0.150388	0.00190407	0.417289		1079.63	61.115	959.972	18.85	903.135	10.6809
KLY-7-63	212.984	454.15	921.21		0.588074	0.0173067	0.0725389	0.000791468	0.370749		538.925	67.58	469.637	11.0702	451.434	4.7633
KLY-7-64	315.082	233.585	169.066		3.51426	0.100326	0.254746	0.00317224	0.436193		1610.8	51.8475	1530.43	22.5902	1462.9	16.3169
KLY-7-65	11.0817	230.901	297.612		0.0524098	0.00375485	0.00769716	0.00016003	0.290197		164.9	207.375	51.8684	3.62291	49.4291	1.02409
KLY-7-66	107.066	55.13	78.1184		5.67234	0.158275	0.348195	0.00439167	0.452018		1924.08	51.8525	1927.17	24.1217	1925.98	21.0246
KLY-7-67	130.627	327.091	410.311		0.56176	0.0182612	0.0689107	0.00067893	0.303082		566.7	72.21	452.671	11.8765	429.59	4.10107
KLY-7-68	17.9004	31.5421	36.7447		0.831694	0.0596782	0.103801	0.00228686	0.307033		568.55	161.09	614.552	33.0847	636.646	13.3601
KLY-7-69	441.081	533.896	294.946		1.70445	0.0434909	0.163535	0.00168797	0.40452		1070.06	50	1010.2	16.3431	976.393	9.36685
KLY-7-70	53.7693	69.0653	121.829		1.13558	0.0422185	0.123912	0.00180606	0.392044		809.26	67.59	770.411	20.08	753.042	10.367
KLY-7-71	145.563	47.8593	389.78		3.32676	0.0711999	0.249206	0.00230543	0.432249		1553.71	36.11	1487.35	16.7395	1434.38	11.9221
KLY-7-72	186.054	135.209	198.675		2.96889	0.0656547	0.233619	0.00253928	0.49151		1464.82	42.285	1399.69	16.8237	1353.44	13.2894
KLY-7-73	324.65	153.921	274.66		10.5277	0.20625	0.423204	0.00411548	0.496374		2650.01	32.1	2482.36	18.2452	2275.01	18.6815
KLY-7-74	31.3108	88.4179	236.018		0.382668	0.0181812	0.0508583	0.000643209	0.266189		398.2	109.248	328.999	13.3535	319.789	3.9495
KLY-7-75	80.2099	314.61	392.954		0.333117	0.0190498	0.0462751	0.000663356	0.250672		279.69	106.468	291.943	14.5108	291.612	4.09017
KLY-7-76	56.6272	241.51	456.373		0.269361	0.0107246	0.0371605	0.000484544	0.327497		305.615	88.8775	242.183	8.58035	235.208	3.01434
KLY-7-77	93.1138	163.02	823.281		0.500456	0.012531	0.0613522	0.000802353	0.522296		568.55	49.065	412.011	8.48453	383.844	4.87772
KLY-7-78	131.643	168.929	203.323		1.25667	0.0368655	0.133593	0.00165586	0.422514		875.925	62.9625	826.408	16.5971	808.329	9.42652
KLY-7-79	358.772	663.44	1181.57		0.799969	0.0438401	0.0794677	0.0015386	0.353293		1021.29	121.3	596.811	24.734	492.945	9.19211
KLY-7-80	60.6289	52.3343	153.32		1.57609	0.0483082	0.158324	0.00247223	0.509451		990.74	61.115	960.83	19.0522	947.458	13.7682
KLY-7-81	180.373	194.447	385.029		1.38046	0.0585085	0.132432	0.00173222	0.308614		1075.93	87.965	880.635	24.9639	801.726	9.87025
KLY-7-82	50.341	53.3871	307.122		0.842734	0.025972	0.0999059	0.00120693	0.39199		638.905	64.8025	620.653	14.3173	613.857	7.08143
KLY-7-83	34.7188	99.1312	312.364		0.310849	0.0138842	0.0478085	0.000610271	0.28579		61.205	107.395	274.839	10.7563	301.053	3.75808
KLY-7-84	423.726	989.246	1643.14		0.57642	0.0159997	0.0728289	0.00079963	0.395559		500.04	59.2525	462.158	10.3103	453.177	4.81104
KLY-7-85	27.305	78.8731	126.325		0.38848	0.0229829	0.0510589	0.000955385	0.316279		453.75	140.725	333.258	16.8087	321.019	5.86219
KLY-7-86	87.7896	313.627	747.103		0.280836	0.00939773	0.0391511	0.000486771	0.371544		333.39	74.0625	251.32	7.45201	247.569	3.02266
KLY-7-87	23.0443	25.353	98.4843		0.96559	0.0465549	0.117767	0.00213192	0.37547		587.065	104.46	686.188	24.0538	717.697	12.3014
KLY-7-88	115.389	98.7018	395.811		1.27424	0.033129	0.147482	0.00158872	0.414334		679.64	49.07	834.285	14.802	886.833	8.93806
KLY-7-89	337.655	230.028	344.988		3.12803	0.155659	0.241042	0.00347726	0.289895		1458.34	70.3725	1439.61	38.3003	1392.11	18.0777
KLY-7-90	115.759	232.76	305.683		0.678668	0.099365	0.0874521	0.00299862	0.234194		561.145	294.41	525.969	60.1044	540.451	17.7782
KLY-7-91	122.248	274.107	473.395		0.454577	0.0400048	0.0578147	0.00324216	0.637225		568.55	240.71	380.48	27.927	362.322	19.759
KLY-7-92	57.4859	68.7177	115.975		0.98115	0.0429151	0.119699	0.00145049	0.277045		564.85	96.28	694.195	22	728.832	8.36015
KLY-7-93	22.5433	45.4251	563.018		0.199934	0.00678225	0.0312403	0.000365522	0.344916		13.06	85.18	185.071	5.74051	198.306	2.28743
KLY-7-94	160.717	310.626	594.08		0.585739	0.0214491	0.075988	0.00142503	0.512122		477.82	95.36	468.143	13.738	472.131	8.54138
KLY-7-95	162.897	477.614	744.11		0.380168	0.0114797	0.0549748	0.000558249	0.336285		187.12	74.06	327.161	8.44852	344.992	3.41626
KLY-7-96	37.0754	138.648	246.729		0.295052	0.0245115	0.0419425	0.0010496	0.30123		255.62	209.24	262.528	19.219	264.863	6.49537
KLY-7-97	214.41	51.8981	320.19		8.50184	1.77727	0.420397	0.0287889	0.327585		1950.01	263.738	2286.12	189.929	2262.28	130.663
KLY-7-98	127.668	299.541	509.912		0.450751	0.0259935	0.065055	0.000957368	0.255194		183.415	126.835	377.805	18.1947	406.295	5.79877
KLY-7-99	150.813	263.548	457.762		0.621246	0.0342017	0.0803722	0.0014029	0.317056		453.75	134.243	490.628	21.423	498.344	8.3752
KLY-7-100	53.5489	38.2022	93.7491		1.72531	0.448975	0.18077	0.00787219	0.167346		1061.12	355.55	1018.01	167.278	1071.18	42.9821
KLY-7-101	20.5178	83.7161	172.486		0.207125	0.0148857	0.0298014	0.000468072	0.218545		187.12	170.347	191.138	12.5219	189.305	2.93185
KLY-7-102	30.9396	111.134	195.059		0.287174	0.070357	0.0437523	0.00181939	0.169732		57.5	374.03	256.333	55.5012	276.05	11.2379
KLY-7-103	43.487	166.428	202.803		0.279964	0.0501849	0.0410155	0.00130261	0.177172		146.38	351.81	250.629	39.8116	259.124	8.06751
KLY-7-104	71.2418	270.329	494.42		0.230267	0.0142265	0.0374545	0.000995489	0.430196		error		210.419	11.7425	237.035	6.18698
KLY-7-105	56.1447	166.666	325.863		0.314454	0.0145714	0.0467486	0.000659367	0.304378		109.35	-93.5075	277.627	11.2576	294.529	4.06383
KLY-7-106	34.216	36.1087	100.372		1.24066	0.34777	0.149876	0.00512866	0.122078		612.98	468.19	819.183	157.597	900.266	28.7563
KLY-7-107	245.604	625.337	621.749		0.484996	0.0143688	0.0695357	0.000799284	0.387981		211.185	100.91	401.495	9.82863	433.358	4.8232
KLY-7-108	111.571	146.781	232.523		0.996763	0.0318778	0.127247	0.00158101	0.388498		464.86	102.765	702.165	16.2173	772.143	9.05096
KLY-7-109	42.3416	139.129	233.597		0.30261	0.0238833	0.0419479	0.000550147	0.166172		257.47	164.792	268.437	18.6179	264.896	3.4067
KLY-7-110	79.6015	353.396	386.441		0.256622	0.0131785	0.036486	0.000490967	0.262031		235.25	122.205	231.941	10.6498	231.015	3.05611
KLY-7-111	99.6469	28.1257	173.717		4.7358	0.124277	0.347643	0.0033454	0.366706		1581.17	47.5275	1773.6	22.0332	1923.33	16.0363
KLY-7-112	123.192	165.33	104.197		1.13814	0.0474346	0.137452	0.00210918	0.368183		609.28	87.95	771.625	22.5324	830.236	11.962
KLY-7-113	56.9075	226.63	241.108		0.274474	0.0120338	0.0412399	0.000629796	0.348321		101.94	109.245	246.264	9.5889	260.514	3.90167
KLY-7-114	724.952	294.969	386.095		8.44093	0.174344	0.431472	0.00478101	0.536476		2239.82	36.27	2279.59	18.8149	2312.35	21.5667
KLY-7-115	157.197	214.287	258.758		1.12198	0.0383376	0.126018	0.00232605	0.540193		746.3	66.66	763.924	18.3522	765.109	13.323
KLY-7-116	61.5262	129.004	259.787		0.560994	0.0221819	0.0690906	0.000915564	0.335142		550.035	83.32	452.173	14.432	430.675	5.52558
KLY-7-117	308.167	212.391	392.869		2.77066	0.0637698	0.237168	0.00272817	0.499784		1295.99	42.5925	1347.67	17.1967	1371.96	14.2347
KLY-7-118	57.6878	126.939	87.3829		0.705789	0.039628	0.0892214	0.0015132	0.302064		509.3	121.28	542.243	23.5918	550.931	8.96061
KLY-7-119	75.0336	65.7276	121.589		1.81243	0.0636619	0.177822	0.00260256	0.416675		1027.78	66.665	1049.96	22.9952	1055.06	14.2556
KLY-7-120	16.6255	72.7309	89.2785		0.270553	0.0195034	0.0398156	0.000769205	0.267998		194.525	174.045	243.136	15.5874	251.69	4.77068

## Sheet: PlotDat14
Source sheet	Sheet2	200	0	400	0	200	0
Plot name	ProbDens5	208.235	0	480	0	2991.76	0
Plot Type	16	216.471	1.32642e-08	480	54
1st free col	9	224.706	2.32268e-08	400	54
Sigma Level	1	232.941	3.98888e-08	400	0
Absolute Errs	TRUE	241.176	6.71844e-08	ErrBox	ErrBox
Symbol Type	1	249.412	1.10979e-07	480	0
Inverse Plot	FALSE	257.647	1.79791e-07	560	0
Color Plot	TRUE	265.882	2.8566e-07	560	36
3D plot	FALSE	274.118	4.4513e-07	480	36
Linear	FALSE	282.353	6.80267e-07	480	0
Data Range	S4:T123	290.588	1.01959e-06	ErrBox	ErrBox
Filled Symbols	FALSE	298.824	1.49875e-06	560	0
ConcAge	FALSE	307.059	2.16066e-06	640	0
ConcSwap	FALSE	315.294	3.05491e-06	640	7
1st Symbol-row	1	323.529	4.23609e-06	560	7
		331.765	5.76087e-06	560	0
		340	7.68361e-06	ErrBox	ErrBox
		348.235	1.00507e-05	640	0
		356.471	1.28939e-05	720	0
		364.706	1.62228e-05	720	4
		372.941	2.00182e-05	640	4
		381.176	2.42257e-05	640	0
		389.412	2.87531e-05	ErrBox	ErrBox
		397.647	3.34953e-05	720	0
		405.882	4.09152e-05	800	0
		414.118	0.000311429	800	3
		422.353	0.00106695	720	3
		430.588	0.00186059	720	0
		438.824	0.00254743	ErrBox	ErrBox
		447.059	0.00488196	800	0
		455.294	0.00639085	880	0
		463.529	0.0114513	880	1
		471.765	0.0166526	800	1
		480	0.0146033	800	0
		488.235	0.0091024	ErrBox	ErrBox
		496.471	0.00558906	960	0
		504.706	0.00482045	1040	0
		512.941	0.00415892	1040	1
		521.176	0.00201029	960	1
		529.412	0.0013082	960	0
		537.647	0.00142526	ErrBox	ErrBox
		545.882	0.00188296	1040	0
		554.118	0.000913565	1120	0
		562.353	0.000604713	1120	3
		570.588	0.000250748	1040	3
		578.824	4.10362e-05	1040	0
		587.059	0.000221315	ErrBox	ErrBox
		595.294	0.000809739	1120	0
		603.529	0.000759785	1200	0
		611.765	0.000329575	1200	1
		620	0.000684031	1120	1
		628.235	0.00117977	1120	0
		636.471	0.00124423	ErrBox	ErrBox
		644.706	0.000807973	1280	0
		652.941	0.000672072	1360	0
		661.176	0.00116561	1360	2
		669.412	0.00119222	1280	2
		677.647	0.000651369	1280	0
		685.882	0.000288806	ErrBox	ErrBox
		694.118	9.50855e-05	1520	0
		702.353	1.7591e-05	1600	0
		710.588	3.34988e-06	1600	1
		718.824	1.24966e-05	1520	1
		727.059	5.62228e-05	1520	0
		735.294	0.000155557	ErrBox	ErrBox
		743.529	0.000262658	1600	0
		751.765	0.000271006	1680	0
		760	0.000176142	1680	1
		768.235	0.000111354	1600	1
		776.471	0.000212312	1600	0
		784.706	0.000469795	ErrBox	ErrBox
		792.941	0.000613856	1840	0
		801.176	0.000449767	1920	0
		809.412	0.00018876	1920	3
		817.647	4.7309e-05	1840	3
		825.882	8.57788e-06	1840	0
		834.118	9.61935e-06	ErrBox	ErrBox
		842.353	4.62148e-05	2560	0
		850.588	0.000145844	2640	0
		858.824	0.000269519	2640	1
		867.059	0.000289628	2560	1
		875.294	0.000181562	2560	0
		883.529	6.818e-05	ErrBox	ErrBox
		891.765	1.84669e-05	2640	0
		900	8.14106e-06	2720	0
		908.235	8.43659e-06	2720	2
		916.471	1.05601e-05	2640	2
		924.706	1.33248e-05	2640	0
		932.941	1.67193e-05	ErrBox	ErrBox
		941.176	2.08979e-05
		949.412	2.70811e-05
		957.647	4.80848e-05
		965.882	0.000137531
		974.118	0.000321884
		982.353	0.000407986
		990.588	0.00027365
		998.824	0.000134848
		1007.06	9.90685e-05
		1015.29	0.00010639
		1023.53	0.000120376
		1031.76	0.000134901
		1040	0.000149152
		1048.24	0.000162628
		1056.47	0.000174794
		1064.71	0.000185146
		1072.94	0.000193224
		1081.18	0.00019865
		1089.41	0.000201158
		1097.65	0.000200617
		1105.88	0.000197045
		1114.12	0.000190606
		1122.35	0.000181607
		1130.59	0.000170472
		1138.82	0.00015772
		1147.06	0.000143926
		1155.29	0.000129684
		1163.53	0.000115588
		1171.76	0.000102165
		1180	8.98861e-05
		1188.24	7.91347e-05
		1196.47	7.02005e-05
		1204.71	6.32855e-05
		1212.94	5.85175e-05
		1221.18	5.59695e-05
		1229.41	5.56798e-05
		1237.65	5.76653e-05
		1245.88	6.19205e-05
		1254.12	6.83935e-05
		1262.35	7.69411e-05
		1270.59	8.7267e-05
		1278.82	9.8862e-05
		1287.06	0.000110971
		1295.29	0.000122607
		1303.53	0.000132641
		1311.76	0.000139937
		1320	0.000143539
		1328.24	0.000142874
		1336.47	0.000137815
		1344.71	0.000128787
		1352.94	0.000116631
		1361.18	0.000102489
		1369.41	8.75756e-05
		1377.65	7.30498e-05
		1385.88	5.97656e-05
		1394.12	4.82808e-05
		1402.35	3.88344e-05
		1410.59	3.14033e-05
		1418.82	2.57849e-05
		1427.06	2.16839e-05
		1435.29	1.87817e-05
		1443.53	1.67838e-05
		1451.76	1.54564e-05
		1460	1.45966e-05
		1468.24	1.40752e-05
		1476.47	1.38052e-05
		1484.71	1.37407e-05
		1492.94	1.38749e-05
		1501.18	1.42355e-05
		1509.41	1.49088e-05
		1517.65	1.60039e-05
		1525.88	1.7683e-05
		1534.12	2.01415e-05
		1542.35	2.35873e-05
		1550.59	2.82066e-05
		1558.82	3.41081e-05
		1567.06	4.13068e-05
		1575.29	4.96134e-05
		1583.53	5.86528e-05
		1591.76	6.78534e-05
		1600	7.6493e-05
		1608.24	8.37852e-05
		1616.47	8.89946e-05
		1624.71	9.15671e-05
		1632.94	9.11978e-05
		1641.18	8.79248e-05
		1649.41	8.21018e-05
		1657.65	7.43404e-05
		1665.88	6.54067e-05
		1674.12	5.61017e-05
		1682.35	4.71517e-05
		1690.59	3.91301e-05
		1698.82	3.24217e-05
		1707.06	2.72404e-05
		1715.29	2.36269e-05
		1723.53	2.1546e-05
		1731.76	2.09317e-05
		1740	2.16958e-05
		1748.24	2.38209e-05
		1756.47	2.73538e-05
		1764.71	3.24249e-05
		1772.94	3.92461e-05
		1781.18	4.80892e-05
		1789.41	5.92392e-05
		1797.65	7.29155e-05
		1805.88	8.91677e-05
		1814.12	0.000107755
		1822.35	0.000128076
		1830.59	0.00014909
		1838.82	0.0001694
		1847.06	0.000187396
		1855.29	0.000201479
		1863.53	0.000210314
		1871.76	0.00021305
		1880	0.000209447
		1888.24	0.000199887
		1896.47	0.000185277
		1904.71	0.000166886
		1912.94	0.000146141
		1921.18	0.00012446
		1929.41	0.000103106
		1937.65	8.31016e-05
		1945.88	6.51816e-05
		1954.12	4.9785e-05
		1962.35	3.70766e-05
		1970.59	2.69902e-05
		1978.82	1.92873e-05
		1987.06	1.36224e-05
		1995.29	9.60499e-06
		2003.53	6.85088e-06
		2011.76	5.01796e-06
		2020	3.82524e-06
		2028.24	3.0537e-06
		2036.47	2.55875e-06
		2044.71	2.22772e-06
		2052.94	1.99424e-06
		2061.18	1.8176e-06
		2069.41	1.67403e-06
		2077.65	1.53935e-06
		2085.88	1.43424e-06
		2094.12	1.3348e-06
		2102.35	1.24085e-06
		2110.59	1.15221e-06
		2118.82	1.06869e-06
		2127.06	9.90109e-07
		2135.29	9.16266e-07
		2143.53	8.46973e-07
		2151.76	7.82035e-07
		2160	7.2126e-07
		2168.24	6.64457e-07
		2176.47	6.11435e-07
		2184.71	5.62008e-07
		2192.94	5.15994e-07
		2201.18	4.73211e-07
		2209.41	4.33485e-07
		2217.65	3.96645e-07
		2225.88	3.62526e-07
		2234.12	3.30968e-07
		2242.35	3.01815e-07
		2250.59	2.74919e-07
		2258.82	2.50137e-07
		2267.06	2.27331e-07
		2275.29	2.06372e-07
		2283.53	1.87133e-07
		2291.76	1.69496e-07
		2300	1.53347e-07
		2308.24	1.38581e-07
		2316.47	1.25095e-07
		2324.71	1.12793e-07
		2332.94	1.01587e-07
		2341.18	9.139e-08
		2349.41	8.21239e-08
		2357.65	7.3714e-08
		2365.88	6.60905e-08
		2374.12	5.91885e-08
		2382.35	5.29473e-08
		2390.59	4.73108e-08
		2398.82	4.22265e-08
		2407.06	3.7646e-08
		2415.29	3.35244e-08
		2423.53	2.98204e-08
		2431.76	2.64956e-08
		2440	2.35149e-08
		2448.24	2.08459e-08
		2456.47	1.8459e-08
		2464.71	1.6327e-08
		2472.94	1.44248e-08
		2481.18	1.27299e-08
		2489.41	1.12214e-08
		2497.65	9.88053e-09
		2505.88	1.87919e-08
		2514.12	2.3329e-08
		2522.35	5.17185e-08
		2530.59	1.20623e-07
		2538.82	2.79685e-07
		2547.06	6.24229e-07
		2555.29	1.39456e-06
		2563.53	3.0838e-06
		2571.76	6.62312e-06
		2580	1.35357e-05
		2588.24	2.58723e-05
		2596.47	4.5681e-05
		2604.71	7.393e-05
		2612.94	0.000109249
		2621.18	0.000147336
		2629.41	0.000181839
		2637.65	0.000206703
		2645.88	0.000218769
		2654.12	0.000218989
		2662.35	0.000211438
		2670.59	0.000200845
		2678.82	0.000190327
		2687.06	0.000180542
		2695.29	0.000170358
		2703.53	0.000158186
		2711.76	0.000143067
		2720	0.0001251
		2728.24	0.000105278
		2736.47	8.50522e-05
		2744.71	6.58732e-05
		2752.94	4.88721e-05
		2761.18	3.47221e-05
		2769.41	2.36131e-05
		2777.65	1.53673e-05
		2785.88	9.56875e-06
		2794.12	5.6996e-06
		2802.35	3.24712e-06
		2810.59	1.76912e-06
		2818.82	9.21674e-07
		2827.06	4.59108e-07
		2835.29	2.18645e-07
		2843.53	9.95463e-08
		2851.76	4.33267e-08
		2860	1.3935e-08
		2868.24	0
		2876.47	0
		2884.71	0
		2892.94	0
		2901.18	0
		2909.41	0
		2917.65	0
		2925.88	0
		2934.12	0
		2942.35	0
		2950.59	0
		2958.82	0
		2967.06	0
		2975.29	0
		2983.53	0
		2991.76	0
		IsoLine	IsoLine

## Sheet: PlotDat5
Source sheet	Sheet2	200	0	400	0	200	0
Plot name	ProbDens1	202.647	0	440	0	1097.35	0
Plot Type	16	205.294	0	440	3
1st free col	9	207.941	0	400	3
Sigma Level	1	210.588	9.94772e-09	400	0
Absolute Errs	TRUE	213.235	1.19892e-08	ErrBox	ErrBox
Symbol Type	1	215.882	1.44206e-08	440	0
Inverse Plot	FALSE	218.529	1.73103e-08	480	0
Color Plot	TRUE	221.176	2.07373e-08	480	51
3D plot	FALSE	223.824	2.47929e-08	440	51
Linear	FALSE	226.471	2.95822e-08	440	0
Data Range	V4:W123	229.118	3.52258e-08	ErrBox	ErrBox
Filled Symbols	FALSE	231.765	4.1862e-08	480	0
ConcAge	FALSE	234.412	4.96484e-08	520	0
ConcSwap	FALSE	237.059	5.87649e-08	520	31
1st Symbol-row	1	239.706	6.94159e-08	480	31
		242.353	8.18328e-08	480	0
		245	9.62771e-08	ErrBox	ErrBox
		247.647	1.13044e-07	520	0
		250.294	1.32464e-07	560	0
		252.941	1.54908e-07	560	5
		255.588	1.80793e-07	520	5
		258.235	2.10578e-07	520	0
		260.882	2.44779e-07	ErrBox	ErrBox
		263.529	2.83963e-07	560	0
		266.176	3.28759e-07	600	0
		268.824	3.79858e-07	600	2
		271.471	4.38018e-07	560	2
		274.118	5.04069e-07	560	0
		276.765	5.78916e-07	ErrBox	ErrBox
		279.412	6.63543e-07	600	0
		282.059	7.59013e-07	640	0
		284.706	8.66478e-07	640	5
		287.353	9.87172e-07	600	5
		290	1.12242e-06	600	0
		292.647	1.27364e-06	ErrBox	ErrBox
		295.294	1.44233e-06	640	0
		297.941	1.63009e-06	680	0
		300.588	1.83858e-06	680	4
		303.235	2.06959e-06	640	4
		305.882	2.32494e-06	640	0
		308.529	2.60656e-06	ErrBox	ErrBox
		311.176	2.91642e-06	720	0
		313.824	3.25658e-06	760	0
		316.471	3.6291e-06	760	1
		319.118	4.03613e-06	720	1
		321.765	4.47979e-06	720	0
		324.412	4.96225e-06	ErrBox	ErrBox
		327.059	5.48563e-06	760	0
		329.706	6.05204e-06	800	0
		332.353	6.66354e-06	800	2
		335	7.32209e-06	760	2
		337.647	8.02959e-06	760	0
		340.294	8.78777e-06	ErrBox	ErrBox
		342.941	9.59824e-06	840	0
		345.588	1.04624e-05	880	0
		348.235	1.13815e-05	880	1
		350.882	1.23565e-05	840	1
		353.529	1.33881e-05	840	0
		356.176	1.44767e-05	ErrBox	ErrBox
		358.824	1.56224e-05	960	0
		361.471	1.68249e-05	1000	0
		364.118	1.80836e-05	1000	1
		366.765	1.93975e-05	960	1
		369.412	2.07651e-05	960	0
		372.059	2.21845e-05	ErrBox	ErrBox
		374.706	2.36533e-05
		377.353	2.51688e-05
		380	2.67276e-05
		382.647	2.8326e-05
		385.294	2.99598e-05
		387.941	3.16242e-05
		390.588	3.3314e-05
		393.235	3.50237e-05
		395.882	3.67604e-05
		398.529	3.85142e-05
		401.176	4.03137e-05
		403.824	4.25616e-05
		406.471	4.83778e-05
		409.118	7.31736e-05
		411.765	0.000162943
		414.412	0.000385019
		417.059	0.000733979
		419.706	0.00105357
		422.353	0.00120822
		425	0.00133397
		427.647	0.0016602
		430.294	0.00207192
		432.941	0.00225585
		435.588	0.00232603
		438.235	0.0027287
		440.882	0.00356838
		443.529	0.00452867
		446.176	0.00531519
		448.824	0.00590594
		451.471	0.0064173
		454.118	0.0069448
		456.765	0.0077331
		459.412	0.00923925
		462.059	0.0115576
		464.706	0.0140301
		467.353	0.0160582
		470	0.0178161
		472.647	0.019253
		475.294	0.0194925
		477.941	0.0181796
		480.588	0.0160363
		483.235	0.0138389
		485.882	0.011866
		488.529	0.0101249
		491.176	0.00860469
		493.824	0.00732969
		496.471	0.00632909
		499.118	0.00565225
		501.765	0.0053704
		504.412	0.00543988
		507.059	0.00557017
		509.706	0.00540367
		512.353	0.00486286
		515	0.00413116
		517.647	0.00333842
		520.294	0.00252854
		522.941	0.00184802
		525.588	0.0014861
		528.235	0.00144544
		530.882	0.00153113
		533.529	0.00157285
		536.176	0.00158004
		538.824	0.00167202
		541.471	0.00189484
		544.118	0.00210976
		546.765	0.00208964
		549.412	0.00176749
		552.059	0.00132093
		554.706	0.000972028
		557.353	0.000795359
		560	0.000729185
		562.647	0.000677391
		565.294	0.000580677
		567.941	0.000437306
		570.588	0.000283949
		573.235	0.000159337
		575.882	8.10787e-05
		578.529	4.76883e-05
		581.176	5.44591e-05
		583.824	0.000106144
		586.471	0.000216757
		589.118	0.000395343
		591.765	0.00062518
		594.412	0.000853654
		597.059	0.00100887
		599.706	0.00103749
		602.353	0.000936153
		605	0.00075165
		607.647	0.000554769
		610.294	0.000411592
		612.941	0.000368107
		615.588	0.000443183
		618.235	0.000621642
		620.882	0.00085407
		623.529	0.00107686
		626.176	0.00124622
		628.824	0.00135586
		631.471	0.00141961
		634.118	0.00144029
		636.765	0.00140099
		639.412	0.00128656
		642.059	0.00110947
		644.706	0.000914942
		647.353	0.000762733
		650	0.000701237
		652.647	0.000749294
		655.294	0.00089199
		657.941	0.00108803
		660.588	0.00128257
		663.235	0.001421
		665.882	0.00146286
		668.529	0.00139473
		671.176	0.00123593
		673.824	0.00102966
		676.471	0.000821892
		679.118	0.000641984
		681.765	0.000497394
		684.412	0.000381904
		687.059	0.000286916
		689.706	0.000207564
		692.353	0.000142731
		695	9.25298e-05
		697.647	5.63084e-05
		700.294	3.21156e-05
		702.941	1.72424e-05
		705.588	8.91827e-06
		708.235	4.90061e-06
		710.882	3.7444e-06
		713.529	4.76868e-06
		716.176	8.02236e-06
		718.824	1.41129e-05
		721.471	2.40922e-05
		724.118	3.92364e-05
		726.765	6.07939e-05
		729.412	8.95063e-05
		732.059	0.000125219
		734.706	0.00016646
		737.353	0.000210267
		740	0.00025238
		742.647	0.000287861
		745.294	0.000312005
		747.941	0.000321388
		750.588	0.000314712
		753.235	0.000293173
		755.882	0.000260308
		758.529	0.000221372
		761.176	0.000182525
		763.824	0.00015007
		766.471	0.00012994
		769.118	0.000127357
		771.765	0.000146489
		774.412	0.000189826
		777.059	0.000257198
		779.706	0.000344666
		782.353	0.000443837
		785	0.000542273
		787.647	0.000625354
		790.294	0.000679368
		792.941	0.000694908
		795.588	0.000669355
		798.235	0.000607453
		800.882	0.000519782
		803.529	0.000419744
		806.176	0.000320247
		808.824	0.000231119
		811.471	0.000157975
		814.118	0.000102417
		816.765	6.30711e-05
		819.412	3.6991e-05
		822.059	2.08147e-05
		824.706	1.1557e-05
		827.353	7.00759e-06
		830	5.85281e-06
		832.647	7.65107e-06
		835.294	1.27441e-05
		837.941	2.21219e-05
		840.588	3.72006e-05
		843.235	5.94822e-05
		845.882	9.00078e-05
		848.529	0.00012876
		851.176	0.000174111
		853.824	0.000222514
		856.471	0.000268768
		859.118	0.000306819
		861.765	0.000331036
		864.412	0.000337564
		867.059	0.000325329
		869.706	0.000296331
		872.353	0.000255105
		875	0.000207562
		877.647	0.000159611
		880.294	0.000116002
		882.941	7.96813e-05
		885.588	5.1729e-05
		888.235	3.17394e-05
		890.882	1.84056e-05
		893.529	1.00876e-05
		896.176	5.22533e-06
		898.824	2.55816e-06
		901.471	1.18366e-06
		904.118	5.17624e-07
		906.765	2.13938e-07
		909.412	8.35699e-08
		912.059	3.08531e-08
		914.706	1.07655e-08
		917.353	0
		920	0
		922.647	0
		925.294	0
		927.941	0
		930.588	0
		933.235	0
		935.882	0
		938.529	1.39475e-08
		941.176	4.84446e-08
		943.824	1.55264e-07
		946.471	4.59167e-07
		949.118	1.25299e-06
		951.765	3.15499e-06
		954.412	7.33032e-06
		957.059	1.57153e-05
		959.706	3.10885e-05
		962.353	5.67481e-05
		965	9.55823e-05
		967.647	0.000148552
		970.294	0.000213037
		972.941	0.000281908
		975.588	0.000344218
		978.235	0.000387825
		980.882	0.000403192
		983.529	0.00038678
		986.176	0.000342367
		988.824	0.000279636
		991.471	0.000210752
		994.118	0.000146563
		996.765	9.40483e-05
		999.412	5.5687e-05
		1002.06	3.04251e-05
		1004.71	1.53386e-05
		1007.35	7.13531e-06
		1010	3.06278e-06
		1012.65	1.21309e-06
		1015.29	4.43351e-07
		1017.94	1.49512e-07
		1020.59	4.65243e-08
		1023.24	1.33585e-08
		1025.88	0
		1028.53	0
		1031.18	0
		1033.82	0
		1036.47	0
		1039.12	0
		1041.76	0
		1044.41	0
		1047.06	0
		1049.71	0
		1052.35	0
		1055	0
		1057.65	0
		1060.29	0
		1062.94	0
		1065.59	0
		1068.24	0
		1070.88	0
		1073.53	0
		1076.18	0
		1078.82	0
		1081.47	0
		1084.12	0
		1086.76	0
		1089.41	0
		1092.06	0
		1094.71	0
		1097.35	0
		IsoLine	IsoLine

## Sheet: PlotDat8
Source sheet	Sheet2	250	1.49972e-07	420	0	250	0
Plot name	ProbDens4	251.176	1.60833e-07	440	0	648.824	0
Plot Type	16	252.353	1.72411e-07	440	3
1st free col	9	253.529	1.8475e-07	420	3
Sigma Level	1	254.706	1.97893e-07	420	0
Absolute Errs	TRUE	255.882	2.11887e-07	ErrBox	ErrBox
Symbol Type	1	257.059	2.26781e-07	440	0
Inverse Plot	FALSE	258.235	2.42625e-07	460	0
Color Plot	TRUE	259.412	2.59473e-07	460	14
3D plot	FALSE	260.588	2.77381e-07	440	14
Linear	FALSE	261.765	2.96407e-07	440	0
Data Range	Y4:Z123	262.941	3.16613e-07	ErrBox	ErrBox
Filled Symbols	FALSE	264.118	3.38062e-07	460	0
ConcAge	FALSE	265.294	3.60821e-07	480	0
ConcSwap	FALSE	266.471	3.84959e-07	480	37
1st Symbol-row	1	267.647	4.10549e-07	460	37
		268.824	4.37666e-07	460	0
		270	4.6639e-07	ErrBox	ErrBox
		271.176	4.96801e-07	480	0
		272.353	5.28985e-07	500	0
		273.529	5.63031e-07	500	21
		274.706	5.9903e-07	480	21
		275.882	6.37078e-07	480	0
		277.059	6.77274e-07	ErrBox	ErrBox
		278.235	7.1972e-07	500	0
		279.412	7.64523e-07	520	0
		280.588	8.11793e-07	520	10
		281.765	8.61643e-07	500	10
		282.941	9.14192e-07	500	0
		284.118	9.69561e-07	ErrBox	ErrBox
		285.294	1.02788e-06	520	0
		286.471	1.08926e-06	540	0
		287.647	1.15386e-06	540	2
		288.824	1.22181e-06	520	2
		290	1.29324e-06	520	0
		291.176	1.3683e-06	ErrBox	ErrBox
		292.353	1.44715e-06	540	0
		293.529	1.52993e-06	560	0
		294.706	1.61681e-06	560	3
		295.882	1.70794e-06	540	3
		297.059	1.80349e-06	540	0
		298.235	1.90363e-06	ErrBox	ErrBox
		299.412	2.00854e-06	560	0
		300.588	2.11839e-06	580	0
		301.765	2.23335e-06	580	1
		302.941	2.35363e-06	560	1
		304.118	2.47939e-06	560	0
		305.294	2.61084e-06	ErrBox	ErrBox
		306.471	2.74817e-06	580	0
		307.647	2.89158e-06	600	0
		308.824	3.04125e-06	600	1
		310	3.19741e-06	580	1
		311.176	3.36026e-06	580	0
		312.353	3.52999e-06	ErrBox	ErrBox
		313.529	3.70683e-06
		314.706	3.89098e-06
		315.882	4.08266e-06
		317.059	4.28209e-06
		318.235	4.48947e-06
		319.412	4.70503e-06
		320.588	4.92898e-06
		321.765	5.16154e-06
		322.941	5.40293e-06
		324.118	5.65337e-06
		325.294	5.91307e-06
		326.471	6.18224e-06
		327.647	6.46111e-06
		328.824	6.74987e-06
		330	7.04874e-06
		331.176	7.35792e-06
		332.353	7.67762e-06
		333.529	8.00803e-06
		334.706	8.34934e-06
		335.882	8.70175e-06
		337.059	9.06544e-06
		338.235	9.44057e-06
		339.412	9.82733e-06
		340.588	1.02259e-05
		341.765	1.06364e-05
		342.941	1.10589e-05
		344.118	1.14937e-05
		345.294	1.19409e-05
		346.471	1.24005e-05
		347.647	1.28727e-05
		348.824	1.33576e-05
		350	1.38553e-05
		351.176	1.43658e-05
		352.353	1.48892e-05
		353.529	1.54255e-05
		354.706	1.59749e-05
		355.882	1.65372e-05
		357.059	1.71125e-05
		358.235	1.77008e-05
		359.412	1.83021e-05
		360.588	1.89163e-05
		361.765	1.95433e-05
		362.941	2.01832e-05
		364.118	2.08357e-05
		365.294	2.15007e-05
		366.471	2.21782e-05
		367.647	2.28679e-05
		368.824	2.35698e-05
		370	2.42835e-05
		371.176	2.5009e-05
		372.353	2.57459e-05
		373.529	2.6494e-05
		374.706	2.7253e-05
		375.882	2.80226e-05
		377.059	2.88025e-05
		378.235	2.95924e-05
		379.412	3.03919e-05
		380.588	3.12006e-05
		381.765	3.20181e-05
		382.941	3.2844e-05
		384.118	3.36779e-05
		385.294	3.45192e-05
		386.471	3.53675e-05
		387.647	3.62222e-05
		388.824	3.70829e-05
		390	3.7949e-05
		391.176	3.88199e-05
		392.353	3.9695e-05
		393.529	4.05738e-05
		394.706	4.14676e-05
		395.882	4.23547e-05
		397.059	4.32552e-05
		398.235	4.4151e-05
		399.412	4.50499e-05
		400.588	4.59759e-05
		401.765	4.69386e-05
		402.941	4.80223e-05
		404.118	4.94414e-05
		405.294	5.16782e-05
		406.471	5.57401e-05
		407.647	6.36267e-05
		408.824	7.87972e-05
		410	0.000106582
		411.176	0.000154099
		412.353	0.000229215
		413.529	0.000338288
		414.706	0.000482925
		415.882	0.000657019
		417.059	0.000845678
		418.235	0.0010277
		419.412	0.00118166
		420.588	0.00129409
		421.765	0.00136617
		422.941	0.00141566
		424.118	0.00147187
		425.294	0.00156506
		426.471	0.00171334
		427.647	0.00191285
		428.824	0.00213641
		430	0.00234296
		431.176	0.00249547
		432.353	0.00257911
		433.529	0.00261073
		434.706	0.00263438
		435.882	0.00270482
		437.059	0.00286753
		438.235	0.00314396
		439.412	0.00352743
		440.588	0.00398867
		441.765	0.00448696
		442.941	0.00498188
		444.118	0.00544244
		445.294	0.00585198
		446.471	0.00620864
		447.647	0.00652151
		448.824	0.00680473
		450	0.00707115
		451.176	0.00732972
		452.353	0.00758741
		453.529	0.00785615
		454.706	0.00816054
		455.882	0.0085418
		457.059	0.00905288
		458.235	0.00974442
		459.412	0.0106453
		460.588	0.0117459
		461.765	0.012992
		462.941	0.0142966
		464.118	0.0155663
		465.294	0.0167338
		466.471	0.0177804
		467.647	0.0187344
		468.824	0.0196423
		470	0.0205274
		471.176	0.0213583
		472.353	0.0220466
		473.529	0.0224787
		474.706	0.0225618
		475.882	0.0222617
		477.059	0.0216125
		478.235	0.0206986
		479.412	0.0196225
		480.588	0.0184768
		481.765	0.017328
		482.941	0.0162152
		484.118	0.0151555
		485.294	0.0141526
		486.471	0.0132041
		487.647	0.0123066
		488.824	0.0114583
		490	0.0106599
		491.176	0.00991419
		492.353	0.00922434
		493.529	0.00859338
		494.706	0.00802388
		495.882	0.00751901
		497.059	0.00708375
		498.235	0.0067254
		499.412	0.00645279
		500.588	0.00627319
		501.765	0.00618769
		502.941	0.00618672
		504.118	0.00624703
		505.294	0.00633308
		506.471	0.00640237
		507.647	0.00641493
		508.824	0.00634262
		510	0.00617555
		511.176	0.00592206
		512.353	0.00560291
		513.529	0.00524201
		514.706	0.00485809
		515.882	0.004461
		517.059	0.00405363
		518.235	0.00363766
		519.412	0.00321965
		520.588	0.00281428
		521.765	0.00244306
		522.941	0.00212926
		524.118	0.00189141
		525.294	0.00173777
		526.471	0.00166384
		527.647	0.00165368
		528.824	0.00168415
		530	0.00173081
		531.176	0.00177373
		532.353	0.0018014
		533.529	0.00181222
		534.706	0.00181325
		535.882	0.00181731
		537.059	0.00183864
		538.235	0.00188872
		539.412	0.00197265
		540.588	0.00208636
		541.765	0.00221602
		542.941	0.00233956
		544.118	0.00243083
		545.294	0.00246578
		546.471	0.00242878
		547.647	0.00231705
		548.824	0.00214159
		550	0.0019241
		551.176	0.00169124
		552.353	0.00146835
		553.529	0.00127444
		554.706	0.00111995
		555.882	0.00100691
		557.059	0.000930669
		558.235	0.000882549
		559.412	0.000852062
		560.588	0.000828871
		561.765	0.00080411
		562.941	0.000771251
		564.118	0.000726543
		565.294	0.000669047
		566.471	0.000600304
		567.647	0.000523718
		568.824	0.000443665
		570	0.000364778
		571.176	0.000291096
		572.353	0.000225678
		573.529	0.000170372
		574.706	0.000125875
		575.882	9.19809e-05
		577.059	6.79333e-05
		578.235	5.27898e-05
		579.412	4.57275e-05
		580.588	4.63349e-05
		581.765	5.45985e-05
		582.941	7.09797e-05
		584.118	9.62392e-05
		585.294	0.000131185
		586.471	0.000176336
		587.647	0.000231553
		588.824	0.000295694
		590	0.000366381
		591.176	0.000439953
		592.353	0.000511654
		593.529	0.000576065
		594.706	0.000627771
		595.882	0.000662056
		597.059	0.000675639
		598.235	0.000667174
		599.412	0.000637467
		600.588	0.000589344
		601.765	0.000527207
		602.941	0.000456368
		604.118	0.00038229
		605.294	0.00030995
		606.471	0.000243268
		607.647	0.000184887
		608.824	0.000136134
		610	9.71858e-05
		611.176	6.73532e-05
		612.353	4.54072e-05
		613.529	2.98791e-05
		614.706	1.92968e-05
		615.882	1.23403e-05
		617.059	7.92093e-06
		618.235	5.19993e-06
		619.412	3.56895e-06
		620.588	2.60986e-06
		621.765	2.04926e-06
		622.941	1.71663e-06
		624.118	1.51027e-06
		625.294	1.37204e-06
		626.471	1.27006e-06
		627.647	1.17736e-06
		628.824	1.1116e-06
		630	1.0491e-06
		631.176	9.89719e-07
		632.353	9.33329e-07
		633.529	8.79803e-07
		634.706	8.29018e-07
		635.882	7.80854e-07
		637.059	7.35196e-07
		638.235	6.91934e-07
		639.412	6.50959e-07
		640.588	6.12167e-07
		641.765	5.75459e-07
		642.941	5.40737e-07
		644.118	5.07909e-07
		645.294	4.76884e-07
		646.471	4.47577e-07
		647.647	4.19904e-07
		648.824	3.93786e-07
		IsoLine	IsoLine

## Sheet: PlotDat13
Source sheet	Sheet2	800	2.14121e-06	1000	0	800	0
Plot name	ProbDens4	806.471	2.6348e-06	1100	0	2993.53	0
Plot Type	16	812.941	3.25559e-06	1100	3
1st free col	9	819.412	4.03362e-06	1000	3
Sigma Level	1	825.882	5.00448e-06	1000	0
Absolute Errs	TRUE	832.353	6.20985e-06	ErrBox	ErrBox
Symbol Type	1	838.824	7.79615e-06	1100	0
Inverse Plot	FALSE	845.294	9.76454e-06	1200	0
Color Plot	TRUE	851.765	1.21268e-05	1200	1
3D plot	FALSE	858.235	1.50277e-05	1100	1
Linear	FALSE	864.706	1.85745e-05	1100	0
Data Range	AA26:AB123	871.176	2.28921e-05	ErrBox	ErrBox
Filled Symbols	FALSE	877.647	2.81257e-05	1300	0
ConcAge	FALSE	884.118	3.44441e-05	1400	0
ConcSwap	FALSE	890.588	4.20416e-05	1400	2
1st Symbol-row	1	897.059	5.12359e-05	1300	2
		903.529	6.21507e-05	1300	0
		910	7.51432e-05	ErrBox	ErrBox
		916.471	9.05518e-05	1500	0
		922.941	0.000108755	1600	0
		929.412	0.00013017	1600	1
		935.882	0.00015525	1500	1
		942.353	0.000184474	1500	0
		948.824	0.000218336	ErrBox	ErrBox
		955.294	0.000257331	1600	0
		961.765	0.000301925	1700	0
		968.235	0.000352535	1700	1
		974.706	0.000409493	1600	1
		981.176	0.000473006	1600	0
		987.647	0.000543126	ErrBox	ErrBox
		994.118	0.000619702	1800	0
		1000.59	0.000702355	1900	0
		1007.06	0.000790441	1900	2
		1013.53	0.00088304	1800	2
		1020	0.000978941	1800	0
		1026.47	0.00107666	ErrBox	ErrBox
		1032.94	0.00117447	1900	0
		1039.41	0.00127041	2000	0
		1045.88	0.00136246	2000	1
		1052.35	0.00144836	1900	1
		1058.82	0.00152597	1900	0
		1065.29	0.00159324	ErrBox	ErrBox
		1071.76	0.00164831	2600	0
		1078.24	0.00168956	2700	0
		1084.71	0.00171578	2700	2
		1091.18	0.00172613	2600	2
		1097.65	0.00172027	2600	0
		1104.12	0.00169834	ErrBox	ErrBox
		1110.59	0.00166095	2700	0
		1117.06	0.00160921	2800	0
		1123.53	0.00154464	2800	1
		1130	0.00146912	2700	1
		1136.47	0.00138481	2700	0
		1142.94	0.00129409	ErrBox	ErrBox
		1149.41	0.00119942
		1155.88	0.00110329
		1162.35	0.00100818
		1168.82	0.000916228
		1175.29	0.000829517
		1181.76	0.000749809
		1188.24	0.000678572
		1194.71	0.000616969
		1201.18	0.000565875
		1207.65	0.00052591
		1214.12	0.000497484
		1220.59	0.000480854
		1227.06	0.00047617
		1233.53	0.000483519
		1240	0.000502923
		1246.47	0.000534304
		1252.94	0.000577408
		1259.41	0.000631669
		1265.88	0.00069605
		1272.35	0.000768882
		1278.82	0.000847731
		1285.29	0.000929339
		1291.76	0.00100968
		1298.24	0.00108417
		1304.71	0.00114797
		1311.18	0.00119644
		1317.65	0.00122557
		1324.12	0.00123273
		1330.59	0.00121652
		1337.06	0.00117728
		1343.53	0.00111724
		1350	0.00103982
		1356.47	0.000949598
		1362.94	0.000851651
		1369.41	0.000750951
		1375.88	0.000652406
		1382.35	0.000559627
		1388.82	0.000475379
		1395.29	0.000401344
		1401.76	0.000338201
		1408.24	0.000285803
		1414.71	0.000243396
		1421.18	0.000209848
		1427.65	0.00018385
		1434.12	0.000164076
		1440.59	0.00014929
		1447.06	0.000138409
		1453.53	0.000130662
		1460	0.000125164
		1466.47	0.00012145
		1472.94	0.000119139
		1479.41	0.000117988
		1485.88	0.000117882
		1492.35	0.000118833
		1498.82	0.000120928
		1505.29	0.000124576
		1511.76	0.000130101
		1518.24	0.000138076
		1524.71	0.000149205
		1531.18	0.000164302
		1537.65	0.000184236
		1544.12	0.000209853
		1550.59	0.000241868
		1557.06	0.000280736
		1563.53	0.000326458
		1570	0.000378679
		1576.47	0.000436215
		1582.94	0.000497292
		1589.41	0.000559497
		1595.88	0.000619898
		1602.35	0.000675256
		1608.82	0.0007223
		1615.29	0.000758036
		1621.76	0.000780065
		1628.24	0.000786954
		1634.71	0.000778029
		1641.18	0.000753946
		1647.65	0.000716319
		1654.12	0.000667616
		1660.59	0.000610895
		1667.06	0.000549496
		1673.53	0.000486732
		1680	0.000425621
		1686.47	0.000368688
		1692.94	0.000317849
		1699.41	0.000274389
		1705.88	0.000239111
		1712.35	0.000212125
		1718.82	0.000193379
		1725.29	0.000182574
		1731.76	0.000179487
		1738.24	0.000183653
		1744.71	0.000195013
		1751.18	0.000213653
		1757.65	0.000239925
		1764.12	0.000274462
		1770.59	0.000318159
		1777.06	0.000372122
		1783.53	0.000437559
		1790	0.000515612
		1796.47	0.000607125
		1802.94	0.00071236
		1809.41	0.000830631
		1815.88	0.000960334
		1822.35	0.00109824
		1828.82	0.00123988
		1835.29	0.00137955
		1841.76	0.00151071
		1848.24	0.00162651
		1854.71	0.00172041
		1861.18	0.00178689
		1867.65	0.00182195
		1874.12	0.00182356
		1880.59	0.00179175
		1887.06	0.00172859
		1893.53	0.00163781
		1900	0.00152442
		1906.47	0.00139418
		1912.94	0.00125314
		1919.41	0.00110717
		1925.88	0.000961637
		1932.35	0.00082115
		1938.82	0.000689426
		1945.29	0.000569214
		1951.76	0.000462291
		1958.24	0.000369528
		1964.71	0.000290989
		1971.18	0.000226073
		1977.65	0.000173677
		1984.12	0.000132361
		1990.59	0.000100514
		1997.06	7.64961e-05
		2003.53	5.87455e-05
		2010	4.58608e-05
		2016.47	3.66431e-05
		2022.94	3.00492e-05
		2029.41	2.54634e-05
		2035.88	2.21891e-05
		2042.35	1.98081e-05
		2048.82	1.80229e-05
		2055.29	1.6629e-05
		2061.76	1.54902e-05
		2068.24	1.45182e-05
		2074.71	1.35337e-05
		2081.18	1.28074e-05
		2087.65	1.21117e-05
		2094.12	1.14458e-05
		2100.59	1.08089e-05
		2107.06	1.02004e-05
		2113.53	9.61935e-06
		2120	9.06511e-06
		2126.47	8.53684e-06
		2132.94	8.03374e-06
		2139.41	7.55502e-06
		2145.88	7.09987e-06
		2152.35	6.66748e-06
		2158.82	6.25705e-06
		2165.29	5.8678e-06
		2171.76	5.49892e-06
		2178.24	5.14963e-06
		2184.71	4.81916e-06
		2191.18	4.50676e-06
		2197.65	4.21166e-06
		2204.12	3.93314e-06
		2210.59	3.67048e-06
		2217.06	3.42296e-06
		2223.53	3.18991e-06
		2230	2.97066e-06
		2236.47	2.76454e-06
		2242.94	2.57093e-06
		2249.41	2.38921e-06
		2255.88	2.21878e-06
		2262.35	2.05908e-06
		2268.82	1.90953e-06
		2275.29	1.76962e-06
		2281.76	1.6388e-06
		2288.24	1.5166e-06
		2294.71	1.40254e-06
		2301.18	1.29614e-06
		2307.65	1.19699e-06
		2314.12	1.10464e-06
		2320.59	1.01871e-06
		2327.06	9.38808e-07
		2333.53	8.6457e-07
		2340	7.95646e-07
		2346.47	7.31706e-07
		2352.94	6.72435e-07
		2359.41	6.17533e-07
		2365.88	5.66719e-07
		2372.35	5.19723e-07
		2378.82	4.76291e-07
		2385.29	4.36185e-07
		2391.76	3.99177e-07
		2398.24	3.65054e-07
		2404.71	3.33614e-07
		2411.18	3.0467e-07
		2417.65	2.78043e-07
		2424.12	2.53566e-07
		2430.59	2.31082e-07
		2437.06	2.10445e-07
		2443.53	1.91517e-07
		2450	1.74171e-07
		2456.47	1.58284e-07
		2462.94	1.43747e-07
		2469.41	1.30453e-07
		2475.88	1.18306e-07
		2482.35	1.07216e-07
		2488.82	9.70969e-08
		2495.29	8.78718e-08
		2501.76	7.94677e-08
		2508.24	1.82301e-07
		2514.71	2.12036e-07
		2521.18	3.96796e-07
		2527.65	7.24055e-07
		2534.12	1.45514e-06
		2540.59	2.84776e-06
		2547.06	5.35269e-06
		2553.53	1.00693e-05
		2560	1.8864e-05
		2566.47	3.48984e-05
		2572.94	6.31179e-05
		2579.41	0.000110516
		2585.88	0.000185779
		2592.35	0.000297903
		2598.82	0.00045359
		2605.29	0.000653858
		2611.76	0.000890961
		2618.24	0.00114726
		2624.71	0.00139731
		2631.18	0.00161333
		2637.65	0.00177246
		2644.12	0.0018631
		2650.59	0.00188759
		2657.06	0.00186011
		2663.53	0.00180084
		2670	0.00172889
		2676.47	0.00165703
		2682.94	0.00158967
		2689.41	0.00152415
		2695.88	0.00145406
		2702.35	0.00137279
		2708.82	0.00127613
		2715.29	0.00116339
		2721.76	0.00103724
		2728.24	0.000902748
		2734.71	0.000766118
		2741.18	0.00063353
		2747.65	0.000510205
		2754.12	0.000400167
		2760.59	0.00030554
		2767.06	0.000227075
		2773.53	0.000164247
		2780	0.000115613
		2786.47	7.91866e-05
		2792.94	5.27715e-05
		2799.41	3.4215e-05
		2805.88	2.15811e-05
		2812.35	1.32417e-05
		2818.82	7.90326e-06
		2825.29	4.58819e-06
		2831.76	2.5908e-06
		2838.24	1.42289e-06
		2844.71	7.60049e-07
		2851.18	3.94856e-07
		2857.65	1.54212e-07
		2864.12	7.57726e-08
		2870.59	0
		2877.06	0
		2883.53	0
		2890	0
		2896.47	0
		2902.94	0
		2909.41	0
		2915.88	0
		2922.35	0
		2928.82	0
		2935.29	0
		2941.76	0
		2948.24	0
		2954.71	0
		2961.18	0
		2967.65	0
		2974.12	0
		2980.59	0
		2987.06	0
		2993.53	0
		IsoLine	IsoLine

## Sheet: PlotDat19
Source sheet	Sheet2	0	0	400	0	0	0
Plot name	ProbDens1	1.5	0	425	0	2998.5	0
Plot Type	16	3	0	425	1
1st free col	9	4.5	0	400	1
Sigma Level	1	6	0	400	0
Absolute Errs	TRUE	7.5	0	ErrBox	ErrBox
Symbol Type	1	9	0	425	0
Inverse Plot	FALSE	10.5	0	450	0
Color Plot	TRUE	12	0	450	8
3D plot	FALSE	13.5	0	425	8
Linear	FALSE	15	0	425	0
Data Range	S4:T123	16.5	0	ErrBox	ErrBox
Filled Symbols	TRUE	18	0	450	0
ConcAge	FALSE	19.5	0	475	0
ConcSwap	FALSE	21	0	475	36
1st Symbol-row	1	22.5	0	450	36
		24	0	450	0
		25.5	0	ErrBox	ErrBox
		27	0	475	0
		28.5	0	500	0
		30	0	500	30
		31.5	0	475	30
		33	0	475	0
		34.5	0	ErrBox	ErrBox
		36	0	500	0
		37.5	0	525	0
		39	0	525	10
		40.5	0	500	10
		42	0	500	0
		43.5	0	ErrBox	ErrBox
		45	0	525	0
		46.5	0	550	0
		48	0	550	5
		49.5	0	525	5
		51	0	525	0
		52.5	0	ErrBox	ErrBox
		54	0	550	0
		55.5	0	575	0
		57	0	575	1
		58.5	0	550	1
		60	0	550	0
		61.5	0	ErrBox	ErrBox
		63	0	575	0
		64.5	0	600	0
		66	0	600	1
		67.5	0	575	1
		69	0	575	0
		70.5	0	ErrBox	ErrBox
		72	0	600	0
		73.5	0	625	0
		75	0	625	2
		76.5	0	600	2
		78	0	600	0
		79.5	0	ErrBox	ErrBox
		81	0	625	0
		82.5	0	650	0
		84	0	650	3
		85.5	0	625	3
		87	0	625	0
		88.5	0	ErrBox	ErrBox
		90	0	650	0
		91.5	0	675	0
		93	0	675	3
		94.5	0	650	3
		96	0	650	0
		97.5	0	ErrBox	ErrBox
		99	0	675	0
		100.5	0	700	0
		102	0	700	1
		103.5	0	675	1
		105	0	675	0
		106.5	0	ErrBox	ErrBox
		108	0	725	0
		109.5	0	750	0
		111	0	750	1
		112.5	0	725	1
		114	0	725	0
		115.5	0	ErrBox	ErrBox
		117	0	775	0
		118.5	0	800	0
		120	0	800	2
		121.5	0	775	2
		123	0	775	0
		124.5	0	ErrBox	ErrBox
		126	0	850	0
		127.5	0	875	0
		129	0	875	1
		130.5	0	850	1
		132	0	850	0
		133.5	0	ErrBox	ErrBox
		135	0	975	0
		136.5	0	1000	0
		138	0	1000	1
		139.5	0	975	1
		141	0	975	0
		142.5	0	ErrBox	ErrBox
		144	0	1050	0
		145.5	0	1075	0
		147	0	1075	1
		148.5	0	1050	1
		150	0	1050	0
		151.5	0	ErrBox	ErrBox
		153	0	1075	0
		154.5	0	1100	0
		156	0	1100	2
		157.5	0	1075	2
		159	0	1075	0
		160.5	0	ErrBox	ErrBox
		162	0	1125	0
		163.5	0	1150	0
		165	0	1150	1
		166.5	0	1125	1
		168	0	1125	0
		169.5	0	ErrBox	ErrBox
		171	0	1300	0
		172.5	0	1325	0
		174	0	1325	1
		175.5	0	1300	1
		177	0	1300	0
		178.5	0	ErrBox	ErrBox
		180	0	1325	0
		181.5	0	1350	0
		183	0	1350	1
		184.5	0	1325	1
		186	0	1325	0
		187.5	0	ErrBox	ErrBox
		189	0	1550	0
		190.5	0	1575	0
		192	0	1575	1
		193.5	0	1550	1
		195	0	1550	0
		196.5	0	ErrBox	ErrBox
		198	0	1625	0
		199.5	0	1650	0
		201	0	1650	1
		202.5	0	1625	1
		204	0	1625	0
		205.5	0	ErrBox	ErrBox
		207	0	1825	0
		208.5	0	1850	0
		210	8.42784e-09	1850	1
		211.5	9.37283e-09	1825	1
		213	1.04171e-08	1825	0
		214.5	1.15701e-08	ErrBox	ErrBox
		216	1.28426e-08	1850	0
		217.5	1.42458e-08	1875	0
		219	1.57921e-08	1875	1
		220.5	1.74949e-08	1850	1
		222	1.93689e-08	1850	0
		223.5	2.14298e-08	ErrBox	ErrBox
		225	2.36947e-08	1900	0
		226.5	2.61821e-08	1925	0
		228	2.89119e-08	1925	1
		229.5	3.19057e-08	1900	1
		231	3.51869e-08	1900	0
		232.5	3.87804e-08	ErrBox	ErrBox
		234	4.27134e-08	2625	0
		235.5	4.70149e-08	2650	0
		237	5.17162e-08	2650	1
		238.5	5.6851e-08	2625	1
		240	6.24553e-08	2625	0
		241.5	6.85677e-08	ErrBox	ErrBox
		243	7.52299e-08	2675	0
		244.5	8.24861e-08	2700	0
		246	9.03839e-08	2700	1
		247.5	9.89741e-08	2675	1
		249	1.08311e-07	2675	0
		250.5	1.18452e-07	ErrBox	ErrBox
		252	1.29459e-07	2700	0
		253.5	1.41397e-07	2725	0
		255	1.54337e-07	2725	1
		256.5	1.68352e-07	2700	1
		258	1.83522e-07	2700	0
		259.5	1.99929e-07	ErrBox	ErrBox
		261	2.17663e-07
		262.5	2.36817e-07
		264	2.57491e-07
		265.5	2.79788e-07
		267	3.03821e-07
		268.5	3.29705e-07
		270	3.57563e-07
		271.5	3.87526e-07
		273	4.19728e-07
		274.5	4.54313e-07
		276	4.9143e-07
		277.5	5.31237e-07
		279	5.73898e-07
		280.5	6.19586e-07
		282	6.68479e-07
		283.5	7.20765e-07
		285	7.76639e-07
		286.5	8.36306e-07
		288	8.99975e-07
		289.5	9.67868e-07
		291	1.04021e-06
		292.5	1.11724e-06
		294	1.1992e-06
		295.5	1.28634e-06
		297	1.37892e-06
		298.5	1.47722e-06
		300	1.5815e-06
		301.5	1.69205e-06
		303	1.80916e-06
		304.5	1.93313e-06
		306	2.06426e-06
		307.5	2.20286e-06
		309	2.34925e-06
		310.5	2.50376e-06
		312	2.66671e-06
		313.5	2.83843e-06
		315	3.01926e-06
		316.5	3.20954e-06
		318	3.40961e-06
		319.5	3.61982e-06
		321	3.84051e-06
		322.5	4.07202e-06
		324	4.31471e-06
		325.5	4.56891e-06
		327	4.83497e-06
		328.5	5.11323e-06
		330	5.404e-06
		331.5	5.70764e-06
		333	6.02444e-06
		334.5	6.35473e-06
		336	6.6988e-06
		337.5	7.05694e-06
		339	7.42945e-06
		340.5	7.81656e-06
		342	8.21855e-06
		343.5	8.63564e-06
		345	9.06804e-06
		346.5	9.51595e-06
		348	9.97955e-06
		349.5	1.0459e-05
		351	1.09544e-05
		352.5	1.14658e-05
		354	1.19934e-05
		355.5	1.25372e-05
		357	1.30972e-05
		358.5	1.36734e-05
		360	1.42657e-05
		361.5	1.48741e-05
		363	1.54985e-05
		364.5	1.61386e-05
		366	1.67943e-05
		367.5	1.74654e-05
		369	1.81516e-05
		370.5	1.88526e-05
		372	1.9568e-05
		373.5	2.02975e-05
		375	2.10406e-05
		376.5	2.17968e-05
		378	2.25657e-05
		379.5	2.33466e-05
		381	2.4139e-05
		382.5	2.49421e-05
		384	2.57554e-05
		385.5	2.6578e-05
		387	2.74092e-05
		388.5	2.82482e-05
		390	2.90941e-05
		391.5	2.9946e-05
		393	3.08029e-05
		394.5	3.16729e-05
		396	3.25399e-05
		397.5	3.34194e-05
		399	3.42966e-05
		400.5	3.51944e-05
		402	3.61418e-05
		403.5	3.72823e-05
		405	3.91015e-05
		406.5	4.28409e-05
		408	5.15264e-05
		409.5	7.11538e-05
		411	0.000111474
		412.5	0.000184688
		414	0.000300546
		415.5	0.000458426
		417	0.000641094
		418.5	0.000816842
		420	0.000953259
		421.5	0.00103714
		423	0.00108716
		424.5	0.00114758
		426	0.00126277
		427.5	0.0014458
		429	0.00166329
		430.5	0.00185219
		432	0.00196332
		433.5	0.00200118
		435	0.00202822
		436.5	0.00212879
		438	0.00236095
		439.5	0.00272916
		441	0.00319011
		442.5	0.00367916
		444	0.00413885
		445.5	0.00453716
		447	0.0048714
		448.5	0.00515888
		450	0.00542119
		451.5	0.00567355
		453	0.00592832
		454.5	0.00621233
		456	0.00658268
		457.5	0.0071214
		459	0.00790111
		460.5	0.00893726
		462	0.0101593
		463.5	0.0114303
		465	0.0126142
		466.5	0.0136506
		468	0.014574
		469.5	0.0154518
		471	0.016284
		472.5	0.0169562
		474	0.0172938
		475.5	0.0171736
		477	0.0165999
		478.5	0.0156913
		480	0.0146076
		481.5	0.0134813
		483	0.01239
		484.5	0.0113645
		486	0.0104091
		487.5	0.00951892
		489	0.00869032
		490.5	0.0079245
		492	0.00722599
		493.5	0.00659975
		495	0.00605008
		496.5	0.00558238
		498	0.00520602
		499.5	0.00493427
		501	0.00477845
		502.5	0.0047367
		504	0.00478334
		505.5	0.00486649
		507	0.00491974
		508.5	0.00488508
		510	0.00473456
		511.5	0.00447716
		513	0.00414625
		514.5	0.00377687
		516	0.00338919
		517.5	0.00298879
		519	0.00258016
		520.5	0.00218023
		522	0.00182083
		523.5	0.00153794
		525	0.0013557
		526.5	0.00127488
		528	0.00127243
		529.5	0.00131133
		531	0.00135553
		532.5	0.00138275
		534	0.00139009
		535.5	0.00139132
		537	0.00140833
		538.5	0.00146022
		540	0.00155357
		541.5	0.0016763
		543	0.00179791
		544.5	0.00187783
		546	0.0018804
		547.5	0.00179004
		549	0.00161844
		550.5	0.0013995
		552	0.0011752
		553.5	0.000980433
		555	0.000834048
		556.5	0.000738129
		558	0.000682651
		559.5	0.00065181
		561	0.000629255
		562.5	0.000601694
		564	0.000560886
		565.5	0.000504274
		567	0.000434374
		568.5	0.000357093
		570	0.000279713
		571.5	0.000208791
		573	0.000148951
		574.5	0.000102442
		576	6.95103e-05
		577.5	4.92587e-05
		579	4.06126e-05
		580.5	4.3159e-05
		582	5.75723e-05
		583.5	8.56666e-05
		585	0.000129975
		586.5	0.000192892
		588	0.000275525
		589.5	0.000376504
		591	0.000491114
		592.5	0.000611068
		594	0.000725317
		595.5	0.000821721
		597	0.000889235
		598.5	0.000920177
		600	0.000911742
		601.5	0.000866496
		603	0.000791624
		604.5	0.000697547
		606	0.000596104
		607.5	0.000498938
		609	0.000416423
		610.5	0.000357051
		612	0.000327108
		613.5	0.0003304
		615	0.000367855
		616.5	0.000437123
		618	0.000532364
		619.5	0.000644765
		621	0.000763751
		622.5	0.000878883
		624	0.000981863
		625.5	0.00106794
		627	0.00113614
		628.5	0.00118828
		630	0.00122711
		631.5	0.00125443
		633	0.00126989
		634.5	0.00127099
		636	0.00125412
		637.5	0.00121625
		639	0.00115649
		640.5	0.00107714
		642	0.00098388
		643.5	0.000885054
		645	0.00079048
		646.5	0.000709966
		648	0.000651935
		649.5	0.00062237
		651	0.000624194
		652.5	0.000657095
		654	0.000717741
		655.5	0.000800301
		657	0.000897068
		658.5	0.000999207
		660	0.00109746
		661.5	0.00118286
		663	0.00124743
		664.5	0.00128494
		666	0.00129158
		667.5	0.00126651
		669	0.00121204
		670.5	0.00113332
		672	0.00103752
		673.5	0.000932626
		675	0.000826131
		676.5	0.000724095
		678	0.000630389
		679.5	0.000546778
		681	0.000473284
		682.5	0.000408825
		684	0.000351884
		685.5	0.000301023
		687	0.000255171
		688.5	0.000213706
		690	0.000176373
		691.5	0.000143147
		693	0.000114072
		694.5	8.91453e-05
		696	6.8292e-05
		697.5	5.12429e-05
		699	3.76589e-05
		700.5	2.71112e-05
		702	1.91461e-05
		703.5	1.32995e-05
		705	9.15074e-06
		706.5	6.32856e-06
		708	4.55674e-06
		709.5	3.60831e-06
		711	3.33915e-06
		712.5	3.66895e-06
		714	4.60214e-06
		715.5	6.17547e-06
		717	8.48741e-06
		718.5	1.16798e-05
		720	1.59295e-05
		721.5	2.14382e-05
		723	2.84195e-05
		724.5	3.70753e-05
		726	4.76067e-05
		727.5	6.01384e-05
		729	7.47362e-05
		730.5	9.13694e-05
		732	0.00010989
		733.5	0.000130017
		735	0.00015133
		736.5	0.000173274
		738	0.000195175
		739.5	0.000216269
		741	0.000235747
		742.5	0.000252821
		744	0.00026671
		745.5	0.000276805
		747	0.00028262
		748.5	0.000283891
		750	0.000280579
		751.5	0.000272874
		753	0.000261195
		754.5	0.000246162
		756	0.000228561
		757.5	0.000209298
		759	0.000189358
		760.5	0.000169764
		762	0.000151537
		763.5	0.000135672
		765	0.000123116
		766.5	0.000114758
		768	0.000111409
		769.5	0.000113787
		771	0.00012249
		772.5	0.000137954
		774	0.000160409
		775.5	0.00018981
		777	0.000225783
		778.5	0.000267568
		780	0.000313989
		781.5	0.000363456
		783	0.000414002
		784.5	0.000463381
		786	0.000509195
		787.5	0.000549065
		789	0.000580814
		790.5	0.000602653
		792	0.000613332
		793.5	0.000612252
		795	0.000599513
		796.5	0.000575892
		798	0.000542765
		799.5	0.000501965
		801	0.000455615
		802.5	0.000405936
		804	0.000355106
		805.5	0.000305057
		807	0.000257414
		808.5	0.000213412
		810	0.000173884
		811.5	0.000139277
		813	0.00010971
		814.5	8.50149e-05
		816	6.48404e-05
		817.5	4.87073e-05
		819	3.60748e-05
		820.5	2.63929e-05
		822	1.91417e-05
		823.5	1.38581e-05
		825	1.01518e-05
		826.5	7.71371e-06
		828	6.31777e-06
		829.5	5.81979e-06
		831	6.15381e-06
		832.5	7.32745e-06
		834	9.41608e-06
		835.5	1.25648e-05
		837	1.6944e-05
		838.5	2.27796e-05
		840	3.03396e-05
		841.5	3.98571e-05
		843	5.15615e-05
		844.5	6.55986e-05
		846	8.20456e-05
		847.5	0.000100842
		849	0.000121792
		850.5	0.000144507
		852	0.000168428
		853.5	0.000192827
		855	0.000216835
		856.5	0.000239491
		858	0.000259798
		859.5	0.0002768
		861	0.000289652
		862.5	0.000297692
		864	0.0003005
		865.5	0.000297928
		867	0.000290122
		868.5	0.000277502
		870	0.000260729
		871.5	0.000240648
		873	0.000218215
		874.5	0.000194426
		876	0.000170245
		877.5	0.000146541
		879	0.000124042
		880.5	0.00010331
		882	8.47244e-05
		883.5	6.84943e-05
		885	5.46739e-05
		886.5	4.31907e-05
		888	3.3878e-05
		889.5	2.65067e-05
		891	2.08149e-05
		892.5	1.65326e-05
		894	1.34093e-05
		895.5	1.11924e-05
		897	9.68477e-06
		898.5	8.71466e-06
		900	8.14348e-06
		901.5	7.86277e-06
		903	7.79018e-06
		904.5	7.86497e-06
		906	8.04353e-06
		907.5	8.29541e-06
		909	8.59992e-06
		910.5	8.94342e-06
		912	9.31717e-06
		913.5	9.7158e-06
		915	1.01362e-05
		916.5	1.05721e-05
		918	1.1034e-05
		919.5	1.1514e-05
		921	1.20126e-05
		922.5	1.25306e-05
		924	1.30685e-05
		925.5	1.3627e-05
		927	1.42067e-05
		928.5	1.48083e-05
		930	1.54324e-05
		931.5	1.60797e-05
		933	1.6751e-05
		934.5	1.74469e-05
		936	1.81681e-05
		937.5	1.89153e-05
		939	1.97047e-05
		940.5	2.0522e-05
		942	2.13823e-05
		943.5	2.22982e-05
		945	2.32912e-05
		946.5	2.43958e-05
		948	2.56666e-05
		949.5	2.71875e-05
		951	2.90823e-05
		952.5	3.15282e-05
		954	3.47677e-05
		955.5	3.912e-05
		957	4.49852e-05
		958.5	5.28389e-05
		960	6.32118e-05
		961.5	7.66505e-05
		963	9.36579e-05
		964.5	0.000114614
		966	0.000139685
		967.5	0.000168733
		969	0.000201237
		970.5	0.000236248
		972	0.000272398
		973.5	0.00030796
		975	0.000340979
		976.5	0.000369448
		978	0.000391517
		979.5	0.000405703
		981	0.000411071
		982.5	0.000407346
		984	0.000394952
		985.5	0.000374955
		987	0.000348933
		988.5	0.000318787
		990	0.000286531
		991.5	0.000254085
		993	0.000223106
		994.5	0.000194874
		996	0.000170245
		997.5	0.00014965
		999	0.000133155
		1000.5	0.000120539
		1002	0.000111387
		1003.5	0.00010518
		1005	0.00010137
		1006.5	9.9435e-05
		1008	9.89136e-05
		1009.5	9.94223e-05
		1011	0.000100658
		1012.5	0.000102392
		1014	0.00010446
		1015.5	0.000106745
		1017	0.000109169
		1018.5	0.000111682
		1020	0.000114251
		1021.5	0.000116855
		1023	0.000119481
		1024.5	0.000122115
		1026	0.000124765
		1027.5	0.000127417
		1029	0.000130068
		1030.5	0.000132715
		1032	0.000135355
		1033.5	0.000137985
		1035	0.000140602
		1036.5	0.000143204
		1038	0.000145787
		1039.5	0.000148348
		1041	0.000150884
		1042.5	0.000153392
		1044	0.000155869
		1045.5	0.00015832
		1047	0.000160726
		1048.5	0.000163091
		1050	0.000165412
		1051.5	0.000167686
		1053	0.00016991
		1054.5	0.00017208
		1056	0.000174194
		1057.5	0.000176249
		1059	0.000178242
		1060.5	0.000180169
		1062	0.000182028
		1063.5	0.000183816
		1065	0.000185531
		1066.5	0.00018717
		1068	0.000188729
		1069.5	0.000190208
		1071	0.000191603
		1072.5	0.000192913
		1074	0.000194135
		1075.5	0.000195267
		1077	0.000196307
		1078.5	0.000197255
		1080	0.000198107
		1081.5	0.000198864
		1083	0.000199523
		1084.5	0.000200083
		1086	0.000200544
		1087.5	0.000200905
		1089	0.000201164
		1090.5	0.000201322
		1092	0.000201379
		1093.5	0.000201333
		1095	0.000201185
		1096.5	0.000200936
		1098	0.000200585
		1099.5	0.000200134
		1101	0.000199582
		1102.5	0.000198931
		1104	0.000198181
		1105.5	0.000197334
		1107	0.000196392
		1108.5	0.000195355
		1110	0.000194225
		1111.5	0.000193004
		1113	0.000191695
		1114.5	0.000190298
		1116	0.000188817
		1117.5	0.000187253
		1119	0.00018561
		1120.5	0.000183889
		1122	0.000182093
		1123.5	0.000180226
		1125	0.00017829
		1126.5	0.000176288
		1128	0.000174224
		1129.5	0.000172099
		1131	0.000169919
		1132.5	0.000167686
		1134	0.000165403
		1135.5	0.000163074
		1137	0.000160702
		1138.5	0.000158292
		1140	0.000155846
		1141.5	0.000153368
		1143	0.000150862
		1144.5	0.000148332
		1146	0.00014578
		1147.5	0.000143211
		1149	0.000140628
		1150.5	0.000138036
		1152	0.000135436
		1153.5	0.000132834
		1155	0.000130232
		1156.5	0.000127634
		1158	0.000125043
		1159.5	0.000122471
		1161	0.000119907
		1162.5	0.000117359
		1164	0.000114832
		1165.5	0.000112329
		1167	0.000109852
		1168.5	0.000107405
		1170	0.000104991
		1171.5	0.000102611
		1173	0.000100269
		1174.5	9.79678e-05
		1176	9.57091e-05
		1177.5	9.34956e-05
		1179	9.13295e-05
		1180.5	8.92129e-05
		1182	8.71479e-05
		1183.5	8.51365e-05
		1185	8.31804e-05
		1186.5	8.12815e-05
		1188	7.94414e-05
		1189.5	7.76616e-05
		1191	7.59435e-05
		1192.5	7.42885e-05
		1194	7.26979e-05
		1195.5	7.11727e-05
		1197	6.97141e-05
		1198.5	6.83231e-05
		1200	6.70005e-05
		1201.5	6.57472e-05
		1203	6.45639e-05
		1204.5	6.34514e-05
		1206	6.24101e-05
		1207.5	6.14407e-05
		1209	6.05437e-05
		1210.5	5.97195e-05
		1212	5.89685e-05
		1213.5	5.82911e-05
		1215	5.76875e-05
		1216.5	5.71581e-05
		1218	5.67031e-05
		1219.5	5.63227e-05
		1221	5.60171e-05
		1222.5	5.57865e-05
		1224	5.5631e-05
		1225.5	5.55508e-05
		1227	5.55459e-05
		1228.5	5.56165e-05
		1230	5.57626e-05
		1231.5	5.59842e-05
		1233	5.62815e-05
		1234.5	5.66544e-05
		1236	5.7103e-05
		1237.5	5.7627e-05
		1239	5.82265e-05
		1240.5	5.89013e-05
		1242	5.96512e-05
		1243.5	6.04759e-05
		1245	6.13752e-05
		1246.5	6.23486e-05
		1248	6.33956e-05
		1249.5	6.45157e-05
		1251	6.5708e-05
		1252.5	6.69719e-05
		1254	6.83062e-05
		1255.5	6.97099e-05
		1257	7.11816e-05
		1258.5	7.27199e-05
		1260	7.4323e-05
		1261.5	7.59892e-05
		1263	7.77163e-05
		1264.5	7.95019e-05
		1266	8.13435e-05
		1267.5	8.32382e-05
		1269	8.51829e-05
		1270.5	8.71743e-05
		1272	8.92088e-05
		1273.5	9.12823e-05
		1275	9.33907e-05
		1276.5	9.55295e-05
		1278	9.76939e-05
		1279.5	9.98789e-05
		1281	0.000102079
		1282.5	0.000104289
		1284	0.000106503
		1285.5	0.000108714
		1287	0.000110917
		1288.5	0.000113105
		1290	0.000115272
		1291.5	0.00011741
		1293	0.000119512
		1294.5	0.000121573
		1296	0.000123583
		1297.5	0.000125538
		1299	0.000127428
		1300.5	0.000129248
		1302	0.00013099
		1303.5	0.000132648
		1305	0.000134215
		1306.5	0.000135684
		1308	0.000137049
		1309.5	0.000138304
		1311	0.000139444
		1312.5	0.000140462
		1314	0.000141356
		1315.5	0.000142119
		1317	0.000142747
		1318.5	0.000143231
		1320	0.000143582
		1321.5	0.000143789
		1323	0.000143852
		1324.5	0.000143767
		1326	0.000143536
		1327.5	0.000143156
		1329	0.000142629
		1330.5	0.000141956
		1332	0.000141137
		1333.5	0.000140168
		1335	0.000139068
		1336.5	0.00013783
		1338	0.000136459
		1339.5	0.00013496
		1341	0.000133336
		1342.5	0.000131593
		1344	0.000129736
		1345.5	0.000127772
		1347	0.000125707
		1348.5	0.000123547
		1350	0.0001213
		1351.5	0.000118972
		1353	0.00011657
		1354.5	0.000114103
		1356	0.000111578
		1357.5	0.000109001
		1359	0.000106382
		1360.5	0.000103727
		1362	0.000101043
		1363.5	9.83392e-05
		1365	9.56215e-05
		1366.5	9.28897e-05
		1368	9.01666e-05
		1369.5	8.74421e-05
		1371	8.47397e-05
		1372.5	8.20565e-05
		1374	7.93982e-05
		1375.5	7.67702e-05
		1377	7.41777e-05
		1378.5	7.16253e-05
		1380	6.91175e-05
		1381.5	6.66582e-05
		1383	6.4251e-05
		1384.5	6.18992e-05
		1386	5.96056e-05
		1387.5	5.73729e-05
		1389	5.5203e-05
		1390.5	5.30978e-05
		1392	5.10589e-05
		1393.5	4.90872e-05
		1395	4.71836e-05
		1396.5	4.53487e-05
		1398	4.35826e-05
		1399.5	4.18854e-05
		1401	4.02567e-05
		1402.5	3.86959e-05
		1404	3.72025e-05
		1405.5	3.57754e-05
		1407	3.44135e-05
		1408.5	3.31156e-05
		1410	3.18803e-05
		1411.5	3.0706e-05
		1413	2.95911e-05
		1414.5	2.85338e-05
		1416	2.75325e-05
		1417.5	2.65851e-05
		1419	2.56899e-05
		1420.5	2.48448e-05
		1422	2.4048e-05
		1423.5	2.32974e-05
		1425	2.25911e-05
		1426.5	2.19272e-05
		1428	2.13037e-05
		1429.5	2.07187e-05
		1431	2.01704e-05
		1432.5	1.96569e-05
		1434	1.91765e-05
		1435.5	1.87274e-05
		1437	1.83079e-05
		1438.5	1.79165e-05
		1440	1.75516e-05
		1441.5	1.72116e-05
		1443	1.68951e-05
		1444.5	1.66007e-05
		1446	1.63272e-05
		1447.5	1.60819e-05
		1449	1.58477e-05
		1450.5	1.5631e-05
		1452	1.54306e-05
		1453.5	1.52457e-05
		1455	1.50752e-05
		1456.5	1.49184e-05
		1458	1.47744e-05
		1459.5	1.46423e-05
		1461	1.45217e-05
		1462.5	1.44117e-05
		1464	1.43117e-05
		1465.5	1.42213e-05
		1467	1.414e-05
		1468.5	1.40672e-05
		1470	1.40025e-05
		1471.5	1.39457e-05
		1473	1.38963e-05
		1474.5	1.38541e-05
		1476	1.38189e-05
		1477.5	1.37905e-05
		1479	1.37686e-05
		1480.5	1.37533e-05
		1482	1.37445e-05
		1483.5	1.3742e-05
		1485	1.37461e-05
		1486.5	1.37566e-05
		1488	1.37737e-05
		1489.5	1.37976e-05
		1491	1.38284e-05
		1492.5	1.38665e-05
		1494	1.39119e-05
		1495.5	1.39652e-05
		1497	1.40191e-05
		1498.5	1.40903e-05
		1500	1.41703e-05
		1501.5	1.42598e-05
		1503	1.43593e-05
		1504.5	1.44695e-05
		1506	1.45909e-05
		1507.5	1.47244e-05
		1509	1.48707e-05
		1510.5	1.50307e-05
		1512	1.52052e-05
		1513.5	1.53951e-05
		1515	1.56015e-05
		1516.5	1.58252e-05
		1518	1.60674e-05
		1519.5	1.63291e-05
		1521	1.66115e-05
		1522.5	1.69158e-05
		1524	1.72431e-05
		1525.5	1.75946e-05
		1527	1.79717e-05
		1528.5	1.83755e-05
		1530	1.88074e-05
		1531.5	1.92686e-05
		1533	1.97604e-05
		1534.5	2.02841e-05
		1536	2.08409e-05
		1537.5	2.14321e-05
		1539	2.20589e-05
		1540.5	2.27224e-05
		1542	2.34237e-05
		1543.5	2.41639e-05
		1545	2.4944e-05
		1546.5	2.57649e-05
		1548	2.66272e-05
		1549.5	2.75319e-05
		1551	2.84793e-05
		1552.5	2.947e-05
		1554	3.05043e-05
		1555.5	3.15823e-05
		1557	3.27041e-05
		1558.5	3.38694e-05
		1560	3.50704e-05
		1561.5	3.63223e-05
		1563	3.76162e-05
		1564.5	3.8951e-05
		1566	4.03255e-05
		1567.5	4.17385e-05
		1569	4.31883e-05
		1570.5	4.46731e-05
		1572	4.61909e-05
		1573.5	4.77393e-05
		1575	4.93159e-05
		1576.5	5.09179e-05
		1578	5.25424e-05
		1579.5	5.41862e-05
		1581	5.58458e-05
		1582.5	5.75177e-05
		1584	5.91981e-05
		1585.5	6.08829e-05
		1587	6.25682e-05
		1588.5	6.42494e-05
		1590	6.59223e-05
		1591.5	6.75823e-05
		1593	6.92246e-05
		1594.5	7.08446e-05
		1596	7.24375e-05
		1597.5	7.39983e-05
		1599	7.55224e-05
		1600.5	7.70048e-05
		1602	7.84408e-05
		1603.5	7.98256e-05
		1605	8.11547e-05
		1606.5	8.24233e-05
		1608	8.36273e-05
		1609.5	8.47623e-05
		1611	8.58244e-05
		1612.5	8.68096e-05
		1614	8.77145e-05
		1615.5	8.85357e-05
		1617	8.92701e-05
		1618.5	8.9915e-05
		1620	9.04679e-05
		1621.5	9.09267e-05
		1623	9.12985e-05
		1624.5	9.15653e-05
		1626	9.17338e-05
		1627.5	9.18035e-05
		1629	9.17739e-05
		1630.5	9.16451e-05
		1632	9.14176e-05
		1633.5	9.10922e-05
		1635	9.067e-05
		1636.5	9.01526e-05
		1638	8.95418e-05
		1639.5	8.884e-05
		1641	8.80496e-05
		1642.5	8.71735e-05
		1644	8.62149e-05
		1645.5	8.51772e-05
		1647	8.4064e-05
		1648.5	8.28794e-05
		1650	8.16274e-05
		1651.5	8.03124e-05
		1653	7.89389e-05
		1654.5	7.75114e-05
		1656	7.60348e-05
		1657.5	7.45137e-05
		1659	7.29532e-05
		1660.5	7.13582e-05
		1662	6.97336e-05
		1663.5	6.80842e-05
		1665	6.64152e-05
		1666.5	6.47312e-05
		1668	6.3037e-05
		1669.5	6.13374e-05
		1671	5.96368e-05
		1672.5	5.79397e-05
		1674	5.62504e-05
		1675.5	5.4573e-05
		1677	5.29114e-05
		1678.5	5.12693e-05
		1680	4.96505e-05
		1681.5	4.80581e-05
		1683	4.64953e-05
		1684.5	4.49651e-05
		1686	4.34703e-05
		1687.5	4.20131e-05
		1689	4.05961e-05
		1690.5	3.92212e-05
		1692	3.78903e-05
		1693.5	3.6605e-05
		1695	3.53667e-05
		1696.5	3.41768e-05
		1698	3.30362e-05
		1699.5	3.19458e-05
		1701	3.09064e-05
		1702.5	2.99267e-05
		1704	2.89921e-05
		1705.5	2.81098e-05
		1707	2.72799e-05
		1708.5	2.65025e-05
		1710	2.57775e-05
		1711.5	2.51047e-05
		1713	2.44838e-05
		1714.5	2.39145e-05
		1716	2.33964e-05
		1717.5	2.29291e-05
		1719	2.2512e-05
		1720.5	2.21447e-05
		1722	2.18266e-05
		1723.5	2.15571e-05
		1725	2.13358e-05
		1726.5	2.11715e-05
		1728	2.10464e-05
		1729.5	2.09682e-05
		1731	2.09364e-05
		1732.5	2.09506e-05
		1734	2.10104e-05
		1735.5	2.11157e-05
		1737	2.12662e-05
		1738.5	2.14617e-05
		1740	2.17022e-05
		1741.5	2.19877e-05
		1743	2.23182e-05
		1744.5	2.26939e-05
		1746	2.31151e-05
		1747.5	2.35821e-05
		1749	2.40954e-05
		1750.5	2.46554e-05
		1752	2.52629e-05
		1753.5	2.59184e-05
		1755	2.66229e-05
		1756.5	2.73772e-05
		1758	2.81823e-05
		1759.5	2.90394e-05
		1761	2.99497e-05
		1762.5	3.09143e-05
		1764	3.19347e-05
		1765.5	3.30123e-05
		1767	3.41486e-05
		1768.5	3.53452e-05
		1770	3.66037e-05
		1771.5	3.79259e-05
		1773	3.93134e-05
		1774.5	4.0768e-05
		1776	4.22916e-05
		1777.5	4.38859e-05
		1779	4.55526e-05
		1780.5	4.72936e-05
		1782	4.91105e-05
		1783.5	5.10051e-05
		1785	5.29789e-05
		1786.5	5.50333e-05
		1788	5.71698e-05
		1789.5	5.93896e-05
		1791	6.16938e-05
		1792.5	6.40831e-05
		1794	6.65584e-05
		1795.5	6.912e-05
		1797	7.17681e-05
		1798.5	7.45026e-05
		1800	7.7323e-05
		1801.5	8.02287e-05
		1803	8.32185e-05
		1804.5	8.6291e-05
		1806	8.94443e-05
		1807.5	9.26761e-05
		1809	9.59754e-05
		1810.5	9.93568e-05
		1812	0.000102807
		1813.5	0.000106322
		1815	0.000109898
		1816.5	0.000113528
		1818	0.000117209
		1819.5	0.000120933
		1821	0.000124695
		1822.5	0.000128487
		1824	0.000132303
		1825.5	0.000136134
		1827	0.000139973
		1828.5	0.00014381
		1830	0.000147638
		1831.5	0.000151446
		1833	0.000155226
		1834.5	0.000158968
		1836	0.000162662
		1837.5	0.000166298
		1839	0.000169866
		1840.5	0.000173356
		1842	0.000176758
		1843.5	0.000180062
		1845	0.000183258
		1846.5	0.000186337
		1848	0.000189288
		1849.5	0.000192103
		1851	0.000194773
		1852.5	0.000197289
		1854	0.000199643
		1855.5	0.000201828
		1857	0.000203837
		1858.5	0.000205663
		1860	0.000207299
		1861.5	0.000208742
		1863	0.000209986
		1864.5	0.000211027
		1866	0.000211862
		1867.5	0.000212488
		1869	0.000212903
		1870.5	0.000213107
		1872	0.000213098
		1873.5	0.000212877
		1875	0.000212446
		1876.5	0.000211805
		1878	0.000210957
		1879.5	0.000209905
		1881	0.000208652
		1882.5	0.000207203
		1884	0.000205563
		1885.5	0.000203736
		1887	0.00020173
		1888.5	0.000199549
		1890	0.000197201
		1891.5	0.000194692
		1893	0.000192031
		1894.5	0.000189225
		1896	0.000186282
		1897.5	0.000183211
		1899	0.00018002
		1900.5	0.000176716
		1902	0.000173311
		1903.5	0.000169811
		1905	0.000166226
		1906.5	0.000162565
		1908	0.000158836
		1909.5	0.000155048
		1911	0.000151211
		1912.5	0.000147332
		1914	0.00014342
		1915.5	0.000139483
		1917	0.000135529
		1918.5	0.000131566
		1920	0.000127602
		1921.5	0.000123644
		1923	0.000119699
		1924.5	0.000115773
		1926	0.000111874
		1927.5	0.000108008
		1929	0.00010418
		1930.5	0.000100396
		1932	9.66615e-05
		1933.5	9.29813e-05
		1935	8.936e-05
		1936.5	8.5802e-05
		1938	8.23111e-05
		1939.5	7.8891e-05
		1941	7.5545e-05
		1942.5	7.22761e-05
		1944	6.90868e-05
		1945.5	6.59796e-05
		1947	6.29563e-05
		1948.5	6.00188e-05
		1950	5.71685e-05
		1951.5	5.44063e-05
		1953	5.17332e-05
		1954.5	4.91497e-05
		1956	4.66561e-05
		1957.5	4.42524e-05
		1959	4.19384e-05
		1960.5	3.97136e-05
		1962	3.75774e-05
		1963.5	3.5529e-05
		1965	3.35671e-05
		1966.5	3.16907e-05
		1968	2.98982e-05
		1969.5	2.81882e-05
		1971	2.65588e-05
		1972.5	2.50084e-05
		1974	2.35348e-05
		1975.5	2.21361e-05
		1977	2.08102e-05
		1978.5	1.95548e-05
		1980	1.83676e-05
		1981.5	1.72463e-05
		1983	1.61886e-05
		1984.5	1.51921e-05
		1986	1.42543e-05
		1987.5	1.33729e-05
		1989	1.25454e-05
		1990.5	1.17695e-05
		1992	1.10428e-05
		1993.5	1.03628e-05
		1995	9.7274e-06
		1996.5	9.13423e-06
		1998	8.58108e-06
		1999.5	8.06578e-06
		2001	7.58624e-06
		2002.5	7.1404e-06
		2004	6.72628e-06
		2005.5	6.34198e-06
		2007	5.98564e-06
		2008.5	5.6555e-06
		2010	5.34985e-06
		2011.5	5.06709e-06
		2013	4.80566e-06
		2014.5	4.56409e-06
		2016	4.34097e-06
		2017.5	4.13499e-06
		2019	3.94488e-06
		2020.5	3.76946e-06
		2022	3.59962e-06
		2023.5	3.4516e-06
		2025	3.31492e-06
		2026.5	3.18869e-06
		2028	3.07208e-06
		2029.5	2.9643e-06
		2031	2.86464e-06
		2032.5	2.7724e-06
		2034	2.68695e-06
		2035.5	2.60772e-06
		2037	2.53416e-06
		2038.5	2.46578e-06
		2040	2.4021e-06
		2041.5	2.34271e-06
		2043	2.28721e-06
		2044.5	2.23526e-06
		2046	2.18651e-06
		2047.5	2.14068e-06
		2049	2.09749e-06
		2050.5	2.0567e-06
		2052	2.01806e-06
		2053.5	1.98139e-06
		2055	1.94649e-06
		2056.5	1.9132e-06
		2058	1.88136e-06
		2059.5	1.85084e-06
		2061	1.82152e-06
		2062.5	1.79327e-06
		2064	1.76601e-06
		2065.5	1.73964e-06
		2067	1.71409e-06
		2068.5	1.68927e-06
		2070	1.66514e-06
		2071.5	1.63367e-06
		2073	1.61162e-06
		2074.5	1.58999e-06
		2076	1.56153e-06
		2077.5	1.54173e-06
		2079	1.52214e-06
		2080.5	1.50273e-06
		2082	1.48352e-06
		2083.5	1.46449e-06
		2085	1.44566e-06
		2086.5	1.42701e-06
		2088	1.40855e-06
		2089.5	1.39028e-06
		2091	1.3722e-06
		2092.5	1.3543e-06
		2094	1.33658e-06
		2095.5	1.31904e-06
		2097	1.30169e-06
		2098.5	1.28451e-06
		2100	1.26752e-06
		2101.5	1.2507e-06
		2103	1.23406e-06
		2104.5	1.2176e-06
		2106	1.20131e-06
		2107.5	1.18519e-06
		2109	1.16925e-06
		2110.5	1.15347e-06
		2112	1.13787e-06
		2113.5	1.12244e-06
		2115	1.10717e-06
		2116.5	1.09207e-06
		2118	1.07714e-06
		2119.5	1.06237e-06
		2121	1.04776e-06
		2122.5	1.03332e-06
		2124	1.01904e-06
		2125.5	1.00491e-06
		2127	9.90946e-07
		2128.5	9.77139e-07
		2130	9.63487e-07
		2131.5	9.49991e-07
		2133	9.36649e-07
		2134.5	9.23459e-07
		2136	9.10421e-07
		2137.5	8.97533e-07
		2139	8.84795e-07
		2140.5	8.72205e-07
		2142	8.59761e-07
		2143.5	8.47464e-07
		2145	8.35311e-07
		2146.5	8.23301e-07
		2148	8.11433e-07
		2149.5	7.99707e-07
		2151	7.8812e-07
		2152.5	7.76673e-07
		2154	7.65362e-07
		2155.5	7.54189e-07
		2157	7.4315e-07
		2158.5	7.32246e-07
		2160	7.21474e-07
		2161.5	7.10834e-07
		2163	7.00325e-07
		2164.5	6.89946e-07
		2166	6.79694e-07
		2167.5	6.6957e-07
		2169	6.59572e-07
		2170.5	6.49699e-07
		2172	6.3995e-07
		2173.5	6.30323e-07
		2175	6.20818e-07
		2176.5	6.11433e-07
		2178	6.02168e-07
		2179.5	5.93021e-07
		2181	5.8399e-07
		2182.5	5.75076e-07
		2184	5.66276e-07
		2185.5	5.57591e-07
		2187	5.49018e-07
		2188.5	5.40556e-07
		2190	5.32205e-07
		2191.5	5.23963e-07
		2193	5.1583e-07
		2194.5	5.07803e-07
		2196	4.99883e-07
		2197.5	4.92068e-07
		2199	4.84357e-07
		2200.5	4.76749e-07
		2202	4.69243e-07
		2203.5	4.61837e-07
		2205	4.54532e-07
		2206.5	4.47325e-07
		2208	4.40216e-07
		2209.5	4.33204e-07
		2211	4.26287e-07
		2212.5	4.19465e-07
		2214	4.12737e-07
		2215.5	4.06101e-07
		2217	3.99558e-07
		2218.5	3.93104e-07
		2220	3.86741e-07
		2221.5	3.80466e-07
		2223	3.74279e-07
		2224.5	3.68179e-07
		2226	3.62165e-07
		2227.5	3.56236e-07
		2229	3.5039e-07
		2230.5	3.44628e-07
		2232	3.38947e-07
		2233.5	3.33348e-07
		2235	3.27829e-07
		2236.5	3.22389e-07
		2238	3.17028e-07
		2239.5	3.11744e-07
		2241	3.06536e-07
		2242.5	3.01405e-07
		2244	2.96348e-07
		2245.5	2.91365e-07
		2247	2.86455e-07
		2248.5	2.81617e-07
		2250	2.7685e-07
		2251.5	2.72154e-07
		2253	2.67528e-07
		2254.5	2.6297e-07
		2256	2.58481e-07
		2257.5	2.54058e-07
		2259	2.49702e-07
		2260.5	2.45411e-07
		2262	2.41185e-07
		2263.5	2.37023e-07
		2265	2.32924e-07
		2266.5	2.28887e-07
		2268	2.24912e-07
		2269.5	2.20997e-07
		2271	2.17143e-07
		2272.5	2.13347e-07
		2274	2.0961e-07
		2275.5	2.05931e-07
		2277	2.02309e-07
		2278.5	1.98743e-07
		2280	1.95233e-07
		2281.5	1.91777e-07
		2283	1.88376e-07
		2284.5	1.85028e-07
		2286	1.81733e-07
		2287.5	1.78489e-07
		2289	1.75297e-07
		2290.5	1.72156e-07
		2292	1.69064e-07
		2293.5	1.66022e-07
		2295	1.63029e-07
		2296.5	1.60083e-07
		2298	1.57185e-07
		2299.5	1.54333e-07
		2301	1.51528e-07
		2302.5	1.48767e-07
		2304	1.46052e-07
		2305.5	1.43381e-07
		2307	1.40753e-07
		2308.5	1.38169e-07
		2310	1.35627e-07
		2311.5	1.33126e-07
		2313	1.30667e-07
		2314.5	1.28248e-07
		2316	1.2587e-07
		2317.5	1.23531e-07
		2319	1.2123e-07
		2320.5	1.18969e-07
		2322	1.16745e-07
		2323.5	1.14558e-07
		2325	1.12408e-07
		2326.5	1.10294e-07
		2328	1.08216e-07
		2329.5	1.06173e-07
		2331	1.04165e-07
		2332.5	1.02191e-07
		2334	1.0025e-07
		2335.5	9.83431e-08
		2337	9.64685e-08
		2338.5	9.46261e-08
		2340	9.28154e-08
		2341.5	9.10359e-08
		2343	8.92871e-08
		2344.5	8.75687e-08
		2346	8.58802e-08
		2347.5	8.4221e-08
		2349	8.25908e-08
		2350.5	8.09891e-08
		2352	7.94155e-08
		2353.5	7.78695e-08
		2355	7.63508e-08
		2356.5	7.48589e-08
		2358	7.33934e-08
		2359.5	7.19538e-08
		2361	7.05399e-08
		2362.5	6.91512e-08
		2364	6.77872e-08
		2365.5	6.64477e-08
		2367	6.51322e-08
		2368.5	6.38403e-08
		2370	6.25717e-08
		2371.5	6.13261e-08
		2373	6.01029e-08
		2374.5	5.8902e-08
		2376	5.77229e-08
		2377.5	5.65652e-08
		2379	5.54287e-08
		2380.5	5.4313e-08
		2382	5.32178e-08
		2383.5	5.21427e-08
		2385	5.10874e-08
		2386.5	5.00516e-08
		2388	4.90349e-08
		2389.5	4.80371e-08
		2391	4.70578e-08
		2392.5	4.60968e-08
		2394	4.51536e-08
		2395.5	4.42282e-08
		2397	4.332e-08
		2398.5	4.2429e-08
		2400	4.15547e-08
		2401.5	4.06969e-08
		2403	3.98553e-08
		2404.5	3.90296e-08
		2406	3.82196e-08
		2407.5	3.7425e-08
		2409	3.66456e-08
		2410.5	3.5881e-08
		2412	3.51311e-08
		2413.5	3.43956e-08
		2415	3.36742e-08
		2416.5	3.29667e-08
		2418	3.22728e-08
		2419.5	3.15924e-08
		2421	3.09251e-08
		2422.5	3.02708e-08
		2424	2.96293e-08
		2425.5	2.90002e-08
		2427	2.83835e-08
		2428.5	2.77788e-08
		2430	2.7186e-08
		2431.5	2.66048e-08
		2433	2.60351e-08
		2434.5	2.54766e-08
		2436	2.49292e-08
		2437.5	2.43926e-08
		2439	2.38667e-08
		2440.5	2.33512e-08
		2442	2.2846e-08
		2443.5	2.23509e-08
		2445	2.18657e-08
		2446.5	2.13903e-08
		2448	2.09244e-08
		2449.5	2.04678e-08
		2451	2.00205e-08
		2452.5	1.95822e-08
		2454	1.91528e-08
		2455.5	1.87321e-08
		2457	1.832e-08
		2458.5	1.79163e-08
		2460	1.75208e-08
		2461.5	1.71334e-08
		2463	1.67539e-08
		2464.5	1.63822e-08
		2466	1.60182e-08
		2467.5	1.56616e-08
		2469	1.53125e-08
		2470.5	1.49705e-08
		2472	1.46357e-08
		2473.5	1.43077e-08
		2475	1.39867e-08
		2476.5	1.36723e-08
		2478	1.33644e-08
		2479.5	1.3063e-08
		2481	1.2768e-08
		2482.5	1.24791e-08
		2484	1.21963e-08
		2485.5	1.19195e-08
		2487	1.16485e-08
		2488.5	1.13832e-08
		2490	1.11236e-08
		2491.5	1.08695e-08
		2493	1.06208e-08
		2494.5	1.03774e-08
		2496	1.01392e-08
		2497.5	9.90604e-09
		2499	9.67792e-09
		2500.5	9.4547e-09
		2502	9.23629e-09
		2503.5	9.02258e-09
		2505	1.80293e-08
		2506.5	1.93837e-08
		2508	2.09892e-08
		2509.5	1.46688e-08
		2511	1.70806e-08
		2512.5	1.98621e-08
		2514	2.30652e-08
		2515.5	2.67486e-08
		2517	3.09782e-08
		2518.5	3.58279e-08
		2520	4.13808e-08
		2521.5	4.77296e-08
		2523	5.49779e-08
		2524.5	6.32412e-08
		2526	7.26478e-08
		2527.5	8.33406e-08
		2529	9.54778e-08
		2530.5	1.19633e-07
		2532	1.38323e-07
		2533.5	1.59911e-07
		2535	1.84856e-07
		2536.5	2.23162e-07
		2538	2.58224e-07
		2539.5	2.98807e-07
		2541	3.45795e-07
		2542.5	4.00211e-07
		2544	4.63241e-07
		2545.5	5.36256e-07
		2547	6.20837e-07
		2548.5	7.18804e-07
		2550	8.32252e-07
		2551.5	9.63575e-07
		2553	1.11551e-06
		2554.5	1.29118e-06
		2556	1.49411e-06
		2557.5	1.7283e-06
		2559	1.99826e-06
		2560.5	2.30902e-06
		2562	2.66622e-06
		2563.5	3.0761e-06
		2565	3.54559e-06
		2566.5	4.08227e-06
		2568	4.69445e-06
		2569.5	5.39118e-06
		2571	6.18219e-06
		2572.5	7.07796e-06
		2574	8.08964e-06
		2575.5	9.22904e-06
		2577	1.05085e-05
		2578.5	1.1941e-05
		2580	1.35397e-05
		2581.5	1.53182e-05
		2583	1.72901e-05
		2584.5	1.94691e-05
		2586	2.18683e-05
		2587.5	2.45007e-05
		2589	2.73783e-05
		2590.5	3.05121e-05
		2592	3.3912e-05
		2593.5	3.75861e-05
		2595	4.15409e-05
		2596.5	4.57805e-05
		2598	5.03066e-05
		2599.5	5.51184e-05
		2601	6.0212e-05
		2602.5	6.55804e-05
		2604	7.12134e-05
		2605.5	7.7097e-05
		2607	8.32141e-05
		2608.5	8.95439e-05
		2610	9.60621e-05
		2611.5	0.000102741
		2613	0.00010955
		2614.5	0.000116456
		2616	0.000123422
		2617.5	0.000130411
		2619	0.000137381
		2620.5	0.000144293
		2622	0.000151104
		2623.5	0.000157772
		2625	0.000164257
		2626.5	0.000170518
		2628	0.000176518
		2629.5	0.00018222
		2631	0.000187592
		2632.5	0.000192605
		2634	0.000197233
		2635.5	0.000201456
		2637	0.000205258
		2638.5	0.000208626
		2640	0.000211554
		2641.5	0.000214042
		2643	0.000216091
		2644.5	0.000217711
		2646	0.000218913
		2647.5	0.000219715
		2649	0.000220137
		2650.5	0.000220202
		2652	0.000219936
		2653.5	0.000219369
		2655	0.000218529
		2656.5	0.000217448
		2658	0.000216157
		2659.5	0.000214686
		2661	0.000213066
		2662.5	0.000211325
		2664	0.000209491
		2665.5	0.000207588
		2667	0.00020564
		2668.5	0.000203665
		2670	0.000201682
		2671.5	0.000199703
		2673	0.00019774
		2674.5	0.000195802
		2676	0.000193892
		2677.5	0.000192014
		2679	0.000190168
		2680.5	0.00018835
		2682	0.000186557
		2683.5	0.000184782
		2685	0.000183017
		2686.5	0.000181254
		2688	0.000179482
		2689.5	0.000177692
		2691	0.000175873
		2692.5	0.000174013
		2694	0.000172104
		2695.5	0.000170135
		2697	0.000168096
		2698.5	0.00016598
		2700	0.000163779
		2701.5	0.000161487
		2703	0.000159099
		2704.5	0.000156612
		2706	0.000154022
		2707.5	0.000151328
		2709	0.000148531
		2710.5	0.000145632
		2712	0.000142632
		2713.5	0.000139537
		2715	0.000136349
		2716.5	0.000133075
		2718	0.000129721
		2719.5	0.000126294
		2721	0.000122801
		2722.5	0.000119252
		2724	0.000115653
		2725.5	0.000112015
		2727	0.000108347
		2728.5	0.000104657
		2730	0.000100956
		2731.5	9.72521e-05
		2733	9.35553e-05
		2734.5	8.98744e-05
		2736	8.6218e-05
		2737.5	8.25948e-05
		2739	7.90127e-05
		2740.5	7.54794e-05
		2742	7.20022e-05
		2743.5	6.85879e-05
		2745	6.52425e-05
		2746.5	6.19719e-05
		2748	5.87747e-05
		2749.5	5.567e-05
		2751	5.26536e-05
		2752.5	4.97289e-05
		2754	4.68989e-05
		2755.5	4.41662e-05
		2757	4.15327e-05
		2758.5	3.89997e-05
		2760	3.65682e-05
		2761.5	3.42386e-05
		2763	3.20108e-05
		2764.5	2.98846e-05
		2766	2.78591e-05
		2767.5	2.5933e-05
		2769	2.4105e-05
		2770.5	2.23731e-05
		2772	2.07354e-05
		2773.5	1.91895e-05
		2775	1.77329e-05
		2776.5	1.63629e-05
		2778	1.50766e-05
		2779.5	1.38711e-05
		2781	1.27433e-05
		2782.5	1.169e-05
		2784	1.0708e-05
		2785.5	9.79405e-06
		2787	8.94496e-06
		2788.5	8.15746e-06
		2790	7.42833e-06
		2791.5	6.75441e-06
		2793	6.13257e-06
		2794.5	5.55977e-06
		2796	5.03303e-06
		2797.5	4.54946e-06
		2799	4.10627e-06
		2800.5	3.70078e-06
		2802	3.3304e-06
		2803.5	2.99264e-06
		2805	2.68516e-06
		2806.5	2.4057e-06
		2808	2.15213e-06
		2809.5	1.92244e-06
		2811	1.71471e-06
		2812.5	1.52715e-06
		2814	1.3581e-06
		2815.5	1.20596e-06
		2817	1.06927e-06
		2818.5	9.4667e-07
		2820	8.36878e-07
		2821.5	7.38719e-07
		2823	6.51103e-07
		2824.5	5.73025e-07
		2826	5.03559e-07
		2827.5	4.41854e-07
		2829	3.87134e-07
		2830.5	3.38684e-07
		2832	2.95857e-07
		2833.5	2.58059e-07
		2835	2.24755e-07
		2836.5	1.95458e-07
		2838	1.69725e-07
		2839.5	1.47161e-07
		2841	1.27406e-07
		2842.5	1.10138e-07
		2844	9.50685e-08
		2845.5	8.19384e-08
		2847	7.05163e-08
		2848.5	6.05958e-08
		2850	5.19932e-08
		2851.5	4.45452e-08
		2853	3.81072e-08
		2854.5	2.51552e-08
		2856	2.14581e-08
		2857.5	1.82763e-08
		2859	1.55424e-08
		2860.5	1.31972e-08
		2862	1.11886e-08
		2863.5	9.47122e-09
		2865	0
		2866.5	0
		2868	0
		2869.5	0
		2871	0
		2872.5	0
		2874	0
		2875.5	0
		2877	0
		2878.5	0
		2880	0
		2881.5	0
		2883	0
		2884.5	0
		2886	0
		2887.5	0
		2889	0
		2890.5	0
		2892	0
		2893.5	0
		2895	0
		2896.5	0
		2898	0
		2899.5	0
		2901	0
		2902.5	0
		2904	0
		2905.5	0
		2907	0
		2908.5	0
		2910	0
		2911.5	0
		2913	0
		2914.5	0
		2916	0
		2917.5	0
		2919	0
		2920.5	0
		2922	0
		2923.5	0
		2925	0
		2926.5	0
		2928	0
		2929.5	0
		2931	0
		2932.5	0
		2934	0
		2935.5	0
		2937	0
		2938.5	0
		2940	0
		2941.5	0
		2943	0
		2944.5	0
		2946	0
		2947.5	0
		2949	0
		2950.5	0
		2952	0
		2953.5	0
		2955	0
		2956.5	0
		2958	0
		2959.5	0
		2961	0
		2962.5	0
		2964	0
		2965.5	0
		2967	0
		2968.5	0
		2970	0
		2971.5	0
		2973	0
		2974.5	0
		2976	0
		2977.5	0
		2979	0
		2980.5	0
		2982	0
		2983.5	0
		2985	0
		2986.5	0
		2988	0
		2989.5	0
		2991	0
		2992.5	0
		2994	0
		2995.5	0
		2997	0
		2998.5	0
[truncated: 1 more rows]

## Sheet: PlotDat17
Source sheet	Sheet2	0	0	400	0	0	0
Plot name	ProbDens2	1.5	0	450	0	2998.5	0
Plot Type	16	3	0	450	9
1st free col	9	4.5	0	400	9
Sigma Level	1	6	0	400	0
Absolute Errs	TRUE	7.5	0	ErrBox	ErrBox
Symbol Type	1	9	0	450	0
Inverse Plot	FALSE	10.5	0	500	0
Color Plot	TRUE	12	0	500	66
3D plot	FALSE	13.5	0	450	66
Linear	FALSE	15	0	450	0
Data Range	S4:T123	16.5	0	ErrBox	ErrBox
Filled Symbols	TRUE	18	0	500	0
ConcAge	FALSE	19.5	0	550	0
ConcSwap	FALSE	21	0	550	15
1st Symbol-row	1	22.5	0	500	15
		24	0	500	0
		25.5	0	ErrBox	ErrBox
		27	0	550	0
		28.5	0	600	0
		30	0	600	2
		31.5	0	550	2
		33	0	550	0
		34.5	0	ErrBox	ErrBox
		36	0	600	0
		37.5	0	650	0
		39	0	650	5
		40.5	0	600	5
		42	0	600	0
		43.5	0	ErrBox	ErrBox
		45	0	650	0
		46.5	0	700	0
		48	0	700	4
		49.5	0	650	4
		51	0	650	0
		52.5	0	ErrBox	ErrBox
		54	0	700	0
		55.5	0	750	0
		57	0	750	1
		58.5	0	700	1
		60	0	700	0
		61.5	0	ErrBox	ErrBox
		63	0	750	0
		64.5	0	800	0
		66	0	800	2
		67.5	0	750	2
		69	0	750	0
		70.5	0	ErrBox	ErrBox
		72	0	850	0
		73.5	0	900	0
		75	0	900	1
		76.5	0	850	1
		78	0	850	0
		79.5	0	ErrBox	ErrBox
		81	0	950	0
		82.5	0	1000	0
		84	0	1000	1
		85.5	0	950	1
		87	0	950	0
		88.5	0	ErrBox	ErrBox
		90	0	1050	0
		91.5	0	1100	0
		93	0	1100	3
		94.5	0	1050	3
		96	0	1050	0
		97.5	0	ErrBox	ErrBox
		99	0	1100	0
		100.5	0	1150	0
		102	0	1150	1
		103.5	0	1100	1
		105	0	1100	0
		106.5	0	ErrBox	ErrBox
		108	0	1300	0
		109.5	0	1350	0
		111	0	1350	2
		112.5	0	1300	2
		114	0	1300	0
		115.5	0	ErrBox	ErrBox
		117	0	1550	0
		118.5	0	1600	0
		120	0	1600	1
		121.5	0	1550	1
		123	0	1550	0
		124.5	0	ErrBox	ErrBox
		126	0	1600	0
		127.5	0	1650	0
		129	0	1650	1
		130.5	0	1600	1
		132	0	1600	0
		133.5	0	ErrBox	ErrBox
		135	0	1800	0
		136.5	0	1850	0
		138	0	1850	1
		139.5	0	1800	1
		141	0	1800	0
		142.5	0	ErrBox	ErrBox
		144	0	1850	0
		145.5	0	1900	0
		147	0	1900	1
		148.5	0	1850	1
		150	0	1850	0
		151.5	0	ErrBox	ErrBox
		153	0	1900	0
		154.5	0	1950	0
		156	0	1950	1
		157.5	0	1900	1
		159	0	1900	0
		160.5	0	ErrBox	ErrBox
		162	0	2600	0
		163.5	0	2650	0
		165	0	2650	1
		166.5	0	2600	1
		168	0	2600	0
		169.5	0	ErrBox	ErrBox
		171	0	2650	0
		172.5	0	2700	0
		174	0	2700	1
		175.5	0	2650	1
		177	0	2650	0
		178.5	0	ErrBox	ErrBox
		180	0	2700	0
		181.5	0	2750	0
		183	0	2750	1
		184.5	0	2700	1
		186	0	2700	0
		187.5	0	ErrBox	ErrBox
		189	0
		190.5	0
		192	0
		193.5	0
		195	0
		196.5	0
		198	0
		199.5	0
		201	0
		202.5	0
		204	0
		205.5	0
		207	0
		208.5	0
		210	8.42784e-09
		211.5	9.37283e-09
		213	1.04171e-08
		214.5	1.15701e-08
		216	1.28426e-08
		217.5	1.42458e-08
		219	1.57921e-08
		220.5	1.74949e-08
		222	1.93689e-08
		223.5	2.14298e-08
		225	2.36947e-08
		226.5	2.61821e-08
		228	2.89119e-08
		229.5	3.19057e-08
		231	3.51869e-08
		232.5	3.87804e-08
		234	4.27134e-08
		235.5	4.70149e-08
		237	5.17162e-08
		238.5	5.6851e-08
		240	6.24553e-08
		241.5	6.85677e-08
		243	7.52299e-08
		244.5	8.24861e-08
		246	9.03839e-08
		247.5	9.89741e-08
		249	1.08311e-07
		250.5	1.18452e-07
		252	1.29459e-07
		253.5	1.41397e-07
		255	1.54337e-07
		256.5	1.68352e-07
		258	1.83522e-07
		259.5	1.99929e-07
		261	2.17663e-07
		262.5	2.36817e-07
		264	2.57491e-07
		265.5	2.79788e-07
		267	3.03821e-07
		268.5	3.29705e-07
		270	3.57563e-07
		271.5	3.87526e-07
		273	4.19728e-07
		274.5	4.54313e-07
		276	4.9143e-07
		277.5	5.31237e-07
		279	5.73898e-07
		280.5	6.19586e-07
		282	6.68479e-07
		283.5	7.20765e-07
		285	7.76639e-07
		286.5	8.36306e-07
		288	8.99975e-07
		289.5	9.67868e-07
		291	1.04021e-06
		292.5	1.11724e-06
		294	1.1992e-06
		295.5	1.28634e-06
		297	1.37892e-06
		298.5	1.47722e-06
		300	1.5815e-06
		301.5	1.69205e-06
		303	1.80916e-06
		304.5	1.93313e-06
		306	2.06426e-06
		307.5	2.20286e-06
		309	2.34925e-06
		310.5	2.50376e-06
		312	2.66671e-06
		313.5	2.83843e-06
		315	3.01926e-06
		316.5	3.20954e-06
		318	3.40961e-06
		319.5	3.61982e-06
		321	3.84051e-06
		322.5	4.07202e-06
		324	4.31471e-06
		325.5	4.56891e-06
		327	4.83497e-06
		328.5	5.11323e-06
		330	5.404e-06
		331.5	5.70764e-06
		333	6.02444e-06
		334.5	6.35473e-06
		336	6.6988e-06
		337.5	7.05694e-06
		339	7.42945e-06
		340.5	7.81656e-06
		342	8.21855e-06
		343.5	8.63564e-06
		345	9.06804e-06
		346.5	9.51595e-06
		348	9.97955e-06
		349.5	1.0459e-05
		351	1.09544e-05
		352.5	1.14658e-05
		354	1.19934e-05
		355.5	1.25372e-05
		357	1.30972e-05
		358.5	1.36734e-05
		360	1.42657e-05
		361.5	1.48741e-05
		363	1.54985e-05
		364.5	1.61386e-05
		366	1.67943e-05
		367.5	1.74654e-05
		369	1.81516e-05
		370.5	1.88526e-05
		372	1.9568e-05
		373.5	2.02975e-05
		375	2.10406e-05
		376.5	2.17968e-05
		378	2.25657e-05
		379.5	2.33466e-05
		381	2.4139e-05
		382.5	2.49421e-05
		384	2.57554e-05
		385.5	2.6578e-05
		387	2.74092e-05
		388.5	2.82482e-05
		390	2.90941e-05
		391.5	2.9946e-05
		393	3.08029e-05
		394.5	3.16729e-05
		396	3.25399e-05
		397.5	3.34194e-05
		399	3.42966e-05
		400.5	3.51944e-05
		402	3.61418e-05
		403.5	3.72823e-05
		405	3.91015e-05
		406.5	4.28409e-05
		408	5.15264e-05
		409.5	7.11538e-05
		411	0.000111474
		412.5	0.000184688
		414	0.000300546
		415.5	0.000458426
		417	0.000641094
		418.5	0.000816842
		420	0.000953259
		421.5	0.00103714
		423	0.00108716
		424.5	0.00114758
		426	0.00126277
		427.5	0.0014458
		429	0.00166329
		430.5	0.00185219
		432	0.00196332
		433.5	0.00200118
		435	0.00202822
		436.5	0.00212879
		438	0.00236095
		439.5	0.00272916
		441	0.00319011
		442.5	0.00367916
		444	0.00413885
		445.5	0.00453716
		447	0.0048714
		448.5	0.00515888
		450	0.00542119
		451.5	0.00567355
		453	0.00592832
		454.5	0.00621233
		456	0.00658268
		457.5	0.0071214
		459	0.00790111
		460.5	0.00893726
		462	0.0101593
		463.5	0.0114303
		465	0.0126142
		466.5	0.0136506
		468	0.014574
		469.5	0.0154518
		471	0.016284
		472.5	0.0169562
		474	0.0172938
		475.5	0.0171736
		477	0.0165999
		478.5	0.0156913
		480	0.0146076
		481.5	0.0134813
		483	0.01239
		484.5	0.0113645
		486	0.0104091
		487.5	0.00951892
		489	0.00869032
		490.5	0.0079245
		492	0.00722599
		493.5	0.00659975
		495	0.00605008
		496.5	0.00558238
		498	0.00520602
		499.5	0.00493427
		501	0.00477845
		502.5	0.0047367
		504	0.00478334
		505.5	0.00486649
		507	0.00491974
		508.5	0.00488508
		510	0.00473456
		511.5	0.00447716
		513	0.00414625
		514.5	0.00377687
		516	0.00338919
		517.5	0.00298879
		519	0.00258016
		520.5	0.00218023
		522	0.00182083
		523.5	0.00153794
		525	0.0013557
		526.5	0.00127488
		528	0.00127243
		529.5	0.00131133
		531	0.00135553
		532.5	0.00138275
		534	0.00139009
		535.5	0.00139132
		537	0.00140833
		538.5	0.00146022
		540	0.00155357
		541.5	0.0016763
		543	0.00179791
		544.5	0.00187783
		546	0.0018804
		547.5	0.00179004
		549	0.00161844
		550.5	0.0013995
		552	0.0011752
		553.5	0.000980433
		555	0.000834048
		556.5	0.000738129
		558	0.000682651
		559.5	0.00065181
		561	0.000629255
		562.5	0.000601694
		564	0.000560886
		565.5	0.000504274
		567	0.000434374
		568.5	0.000357093
		570	0.000279713
		571.5	0.000208791
		573	0.000148951
		574.5	0.000102442
		576	6.95103e-05
		577.5	4.92587e-05
		579	4.06126e-05
		580.5	4.3159e-05
		582	5.75723e-05
		583.5	8.56666e-05
		585	0.000129975
		586.5	0.000192892
		588	0.000275525
		589.5	0.000376504
		591	0.000491114
		592.5	0.000611068
		594	0.000725317
		595.5	0.000821721
		597	0.000889235
		598.5	0.000920177
		600	0.000911742
		601.5	0.000866496
		603	0.000791624
		604.5	0.000697547
		606	0.000596104
		607.5	0.000498938
		609	0.000416423
		610.5	0.000357051
		612	0.000327108
		613.5	0.0003304
		615	0.000367855
		616.5	0.000437123
		618	0.000532364
		619.5	0.000644765
		621	0.000763751
		622.5	0.000878883
		624	0.000981863
		625.5	0.00106794
		627	0.00113614
		628.5	0.00118828
		630	0.00122711
		631.5	0.00125443
		633	0.00126989
		634.5	0.00127099
		636	0.00125412
		637.5	0.00121625
		639	0.00115649
		640.5	0.00107714
		642	0.00098388
		643.5	0.000885054
		645	0.00079048
		646.5	0.000709966
		648	0.000651935
		649.5	0.00062237
		651	0.000624194
		652.5	0.000657095
		654	0.000717741
		655.5	0.000800301
		657	0.000897068
		658.5	0.000999207
		660	0.00109746
		661.5	0.00118286
		663	0.00124743
		664.5	0.00128494
		666	0.00129158
		667.5	0.00126651
		669	0.00121204
		670.5	0.00113332
		672	0.00103752
		673.5	0.000932626
		675	0.000826131
		676.5	0.000724095
		678	0.000630389
		679.5	0.000546778
		681	0.000473284
		682.5	0.000408825
		684	0.000351884
		685.5	0.000301023
		687	0.000255171
		688.5	0.000213706
		690	0.000176373
		691.5	0.000143147
		693	0.000114072
		694.5	8.91453e-05
		696	6.8292e-05
		697.5	5.12429e-05
		699	3.76589e-05
		700.5	2.71112e-05
		702	1.91461e-05
		703.5	1.32995e-05
		705	9.15074e-06
		706.5	6.32856e-06
		708	4.55674e-06
		709.5	3.60831e-06
		711	3.33915e-06
		712.5	3.66895e-06
		714	4.60214e-06
		715.5	6.17547e-06
		717	8.48741e-06
		718.5	1.16798e-05
		720	1.59295e-05
		721.5	2.14382e-05
		723	2.84195e-05
		724.5	3.70753e-05
		726	4.76067e-05
		727.5	6.01384e-05
		729	7.47362e-05
		730.5	9.13694e-05
		732	0.00010989
		733.5	0.000130017
		735	0.00015133
		736.5	0.000173274
		738	0.000195175
		739.5	0.000216269
		741	0.000235747
		742.5	0.000252821
		744	0.00026671
		745.5	0.000276805
		747	0.00028262
		748.5	0.000283891
		750	0.000280579
		751.5	0.000272874
		753	0.000261195
		754.5	0.000246162
		756	0.000228561
		757.5	0.000209298
		759	0.000189358
		760.5	0.000169764
		762	0.000151537
		763.5	0.000135672
		765	0.000123116
		766.5	0.000114758
		768	0.000111409
		769.5	0.000113787
		771	0.00012249
		772.5	0.000137954
		774	0.000160409
		775.5	0.00018981
		777	0.000225783
		778.5	0.000267568
		780	0.000313989
		781.5	0.000363456
		783	0.000414002
		784.5	0.000463381
		786	0.000509195
		787.5	0.000549065
		789	0.000580814
		790.5	0.000602653
		792	0.000613332
		793.5	0.000612252
		795	0.000599513
		796.5	0.000575892
		798	0.000542765
		799.5	0.000501965
		801	0.000455615
		802.5	0.000405936
		804	0.000355106
		805.5	0.000305057
		807	0.000257414
		808.5	0.000213412
		810	0.000173884
		811.5	0.000139277
		813	0.00010971
		814.5	8.50149e-05
		816	6.48404e-05
		817.5	4.87073e-05
		819	3.60748e-05
		820.5	2.63929e-05
		822	1.91417e-05
		823.5	1.38581e-05
		825	1.01518e-05
		826.5	7.71371e-06
		828	6.31777e-06
		829.5	5.81979e-06
		831	6.15381e-06
		832.5	7.32745e-06
		834	9.41608e-06
		835.5	1.25648e-05
		837	1.6944e-05
		838.5	2.27796e-05
		840	3.03396e-05
		841.5	3.98571e-05
		843	5.15615e-05
		844.5	6.55986e-05
		846	8.20456e-05
		847.5	0.000100842
		849	0.000121792
		850.5	0.000144507
		852	0.000168428
		853.5	0.000192827
		855	0.000216835
		856.5	0.000239491
		858	0.000259798
		859.5	0.0002768
		861	0.000289652
		862.5	0.000297692
		864	0.0003005
		865.5	0.000297928
		867	0.000290122
		868.5	0.000277502
		870	0.000260729
		871.5	0.000240648
		873	0.000218215
		874.5	0.000194426
		876	0.000170245
		877.5	0.000146541
		879	0.000124042
		880.5	0.00010331
		882	8.47244e-05
		883.5	6.84943e-05
		885	5.46739e-05
		886.5	4.31907e-05
		888	3.3878e-05
		889.5	2.65067e-05
		891	2.08149e-05
		892.5	1.65326e-05
		894	1.34093e-05
		895.5	1.11924e-05
		897	9.68477e-06
		898.5	8.71466e-06
		900	8.14348e-06
		901.5	7.86277e-06
		903	7.79018e-06
		904.5	7.86497e-06
		906	8.04353e-06
		907.5	8.29541e-06
		909	8.59992e-06
		910.5	8.94342e-06
		912	9.31717e-06
		913.5	9.7158e-06
		915	1.01362e-05
		916.5	1.05721e-05
		918	1.1034e-05
		919.5	1.1514e-05
		921	1.20126e-05
		922.5	1.25306e-05
		924	1.30685e-05
		925.5	1.3627e-05
		927	1.42067e-05
		928.5	1.48083e-05
		930	1.54324e-05
		931.5	1.60797e-05
		933	1.6751e-05
		934.5	1.74469e-05
		936	1.81681e-05
		937.5	1.89153e-05
		939	1.97047e-05
		940.5	2.0522e-05
		942	2.13823e-05
		943.5	2.22982e-05
		945	2.32912e-05
		946.5	2.43958e-05
		948	2.56666e-05
		949.5	2.71875e-05
		951	2.90823e-05
		952.5	3.15282e-05
		954	3.47677e-05
		955.5	3.912e-05
		957	4.49852e-05
		958.5	5.28389e-05
		960	6.32118e-05
		961.5	7.66505e-05
		963	9.36579e-05
		964.5	0.000114614
		966	0.000139685
		967.5	0.000168733
		969	0.000201237
		970.5	0.000236248
		972	0.000272398
		973.5	0.00030796
		975	0.000340979
		976.5	0.000369448
		978	0.000391517
		979.5	0.000405703
		981	0.000411071
		982.5	0.000407346
		984	0.000394952
		985.5	0.000374955
		987	0.000348933
		988.5	0.000318787
		990	0.000286531
		991.5	0.000254085
		993	0.000223106
		994.5	0.000194874
		996	0.000170245
		997.5	0.00014965
		999	0.000133155
		1000.5	0.000120539
		1002	0.000111387
		1003.5	0.00010518
		1005	0.00010137
		1006.5	9.9435e-05
		1008	9.89136e-05
		1009.5	9.94223e-05
		1011	0.000100658
		1012.5	0.000102392
		1014	0.00010446
		1015.5	0.000106745
		1017	0.000109169
		1018.5	0.000111682
		1020	0.000114251
		1021.5	0.000116855
		1023	0.000119481
		1024.5	0.000122115
		1026	0.000124765
		1027.5	0.000127417
		1029	0.000130068
		1030.5	0.000132715
		1032	0.000135355
		1033.5	0.000137985
		1035	0.000140602
		1036.5	0.000143204
		1038	0.000145787
		1039.5	0.000148348
		1041	0.000150884
		1042.5	0.000153392
		1044	0.000155869
		1045.5	0.00015832
		1047	0.000160726
		1048.5	0.000163091
		1050	0.000165412
		1051.5	0.000167686
		1053	0.00016991
		1054.5	0.00017208
		1056	0.000174194
		1057.5	0.000176249
		1059	0.000178242
		1060.5	0.000180169
		1062	0.000182028
		1063.5	0.000183816
		1065	0.000185531
		1066.5	0.00018717
		1068	0.000188729
		1069.5	0.000190208
		1071	0.000191603
		1072.5	0.000192913
		1074	0.000194135
		1075.5	0.000195267
		1077	0.000196307
		1078.5	0.000197255
		1080	0.000198107
		1081.5	0.000198864
		1083	0.000199523
		1084.5	0.000200083
		1086	0.000200544
		1087.5	0.000200905
		1089	0.000201164
		1090.5	0.000201322
		1092	0.000201379
		1093.5	0.000201333
		1095	0.000201185
		1096.5	0.000200936
		1098	0.000200585
		1099.5	0.000200134
		1101	0.000199582
		1102.5	0.000198931
		1104	0.000198181
		1105.5	0.000197334
		1107	0.000196392
		1108.5	0.000195355
		1110	0.000194225
		1111.5	0.000193004
		1113	0.000191695
		1114.5	0.000190298
		1116	0.000188817
		1117.5	0.000187253
		1119	0.00018561
		1120.5	0.000183889
		1122	0.000182093
		1123.5	0.000180226
		1125	0.00017829
		1126.5	0.000176288
		1128	0.000174224
		1129.5	0.000172099
		1131	0.000169919
		1132.5	0.000167686
		1134	0.000165403
		1135.5	0.000163074
		1137	0.000160702
		1138.5	0.000158292
		1140	0.000155846
		1141.5	0.000153368
		1143	0.000150862
		1144.5	0.000148332
		1146	0.00014578
		1147.5	0.000143211
		1149	0.000140628
		1150.5	0.000138036
		1152	0.000135436
		1153.5	0.000132834
		1155	0.000130232
		1156.5	0.000127634
		1158	0.000125043
		1159.5	0.000122471
		1161	0.000119907
		1162.5	0.000117359
		1164	0.000114832
		1165.5	0.000112329
		1167	0.000109852
		1168.5	0.000107405
		1170	0.000104991
		1171.5	0.000102611
		1173	0.000100269
		1174.5	9.79678e-05
		1176	9.57091e-05
		1177.5	9.34956e-05
		1179	9.13295e-05
		1180.5	8.92129e-05
		1182	8.71479e-05
		1183.5	8.51365e-05
		1185	8.31804e-05
		1186.5	8.12815e-05
		1188	7.94414e-05
		1189.5	7.76616e-05
		1191	7.59435e-05
		1192.5	7.42885e-05
		1194	7.26979e-05
		1195.5	7.11727e-05
		1197	6.97141e-05
		1198.5	6.83231e-05
		1200	6.70005e-05
		1201.5	6.57472e-05
		1203	6.45639e-05
		1204.5	6.34514e-05
		1206	6.24101e-05
		1207.5	6.14407e-05
		1209	6.05437e-05
		1210.5	5.97195e-05
		1212	5.89685e-05
		1213.5	5.82911e-05
		1215	5.76875e-05
		1216.5	5.71581e-05
		1218	5.67031e-05
		1219.5	5.63227e-05
		1221	5.60171e-05
		1222.5	5.57865e-05
		1224	5.5631e-05
		1225.5	5.55508e-05
		1227	5.55459e-05
		1228.5	5.56165e-05
		1230	5.57626e-05
		1231.5	5.59842e-05
		1233	5.62815e-05
		1234.5	5.66544e-05
		1236	5.7103e-05
		1237.5	5.7627e-05
		1239	5.82265e-05
		1240.5	5.89013e-05
		1242	5.96512e-05
		1243.5	6.04759e-05
		1245	6.13752e-05
		1246.5	6.23486e-05
		1248	6.33956e-05
		1249.5	6.45157e-05
		1251	6.5708e-05
		1252.5	6.69719e-05
		1254	6.83062e-05
		1255.5	6.97099e-05
		1257	7.11816e-05
		1258.5	7.27199e-05
		1260	7.4323e-05
		1261.5	7.59892e-05
		1263	7.77163e-05
		1264.5	7.95019e-05
		1266	8.13435e-05
		1267.5	8.32382e-05
		1269	8.51829e-05
		1270.5	8.71743e-05
		1272	8.92088e-05
		1273.5	9.12823e-05
		1275	9.33907e-05
		1276.5	9.55295e-05
		1278	9.76939e-05
		1279.5	9.98789e-05
		1281	0.000102079
		1282.5	0.000104289
		1284	0.000106503
		1285.5	0.000108714
		1287	0.000110917
		1288.5	0.000113105
		1290	0.000115272
		1291.5	0.00011741
		1293	0.000119512
		1294.5	0.000121573
		1296	0.000123583
		1297.5	0.000125538
		1299	0.000127428
		1300.5	0.000129248
		1302	0.00013099
		1303.5	0.000132648
		1305	0.000134215
		1306.5	0.000135684
		1308	0.000137049
		1309.5	0.000138304
		1311	0.000139444
		1312.5	0.000140462
		1314	0.000141356
		1315.5	0.000142119
		1317	0.000142747
		1318.5	0.000143231
		1320	0.000143582
		1321.5	0.000143789
		1323	0.000143852
		1324.5	0.000143767
		1326	0.000143536
		1327.5	0.000143156
		1329	0.000142629
		1330.5	0.000141956
		1332	0.000141137
		1333.5	0.000140168
		1335	0.000139068
		1336.5	0.00013783
		1338	0.000136459
		1339.5	0.00013496
		1341	0.000133336
		1342.5	0.000131593
		1344	0.000129736
		1345.5	0.000127772
		1347	0.000125707
		1348.5	0.000123547
		1350	0.0001213
		1351.5	0.000118972
		1353	0.00011657
		1354.5	0.000114103
		1356	0.000111578
		1357.5	0.000109001
		1359	0.000106382
		1360.5	0.000103727
		1362	0.000101043
		1363.5	9.83392e-05
		1365	9.56215e-05
		1366.5	9.28897e-05
		1368	9.01666e-05
		1369.5	8.74421e-05
		1371	8.47397e-05
		1372.5	8.20565e-05
		1374	7.93982e-05
		1375.5	7.67702e-05
		1377	7.41777e-05
		1378.5	7.16253e-05
		1380	6.91175e-05
		1381.5	6.66582e-05
		1383	6.4251e-05
		1384.5	6.18992e-05
		1386	5.96056e-05
		1387.5	5.73729e-05
		1389	5.5203e-05
		1390.5	5.30978e-05
		1392	5.10589e-05
		1393.5	4.90872e-05
		1395	4.71836e-05
		1396.5	4.53487e-05
		1398	4.35826e-05
		1399.5	4.18854e-05
		1401	4.02567e-05
		1402.5	3.86959e-05
		1404	3.72025e-05
		1405.5	3.57754e-05
		1407	3.44135e-05
		1408.5	3.31156e-05
		1410	3.18803e-05
		1411.5	3.0706e-05
		1413	2.95911e-05
		1414.5	2.85338e-05
		1416	2.75325e-05
		1417.5	2.65851e-05
		1419	2.56899e-05
		1420.5	2.48448e-05
		1422	2.4048e-05
		1423.5	2.32974e-05
		1425	2.25911e-05
		1426.5	2.19272e-05
		1428	2.13037e-05
		1429.5	2.07187e-05
		1431	2.01704e-05
		1432.5	1.96569e-05
		1434	1.91765e-05
		1435.5	1.87274e-05
		1437	1.83079e-05
		1438.5	1.79165e-05
		1440	1.75516e-05
		1441.5	1.72116e-05
		1443	1.68951e-05
		1444.5	1.66007e-05
		1446	1.63272e-05
		1447.5	1.60819e-05
		1449	1.58477e-05
		1450.5	1.5631e-05
		1452	1.54306e-05
		1453.5	1.52457e-05
		1455	1.50752e-05
		1456.5	1.49184e-05
		1458	1.47744e-05
		1459.5	1.46423e-05
		1461	1.45217e-05
		1462.5	1.44117e-05
		1464	1.43117e-05
		1465.5	1.42213e-05
		1467	1.414e-05
		1468.5	1.40672e-05
		1470	1.40025e-05
		1471.5	1.39457e-05
		1473	1.38963e-05
		1474.5	1.38541e-05
		1476	1.38189e-05
		1477.5	1.37905e-05
		1479	1.37686e-05
		1480.5	1.37533e-05
		1482	1.37445e-05
		1483.5	1.3742e-05
		1485	1.37461e-05
		1486.5	1.37566e-05
		1488	1.37737e-05
		1489.5	1.37976e-05
		1491	1.38284e-05
		1492.5	1.38665e-05
		1494	1.39119e-05
		1495.5	1.39652e-05
		1497	1.40191e-05
		1498.5	1.40903e-05
		1500	1.41703e-05
		1501.5	1.42598e-05
		1503	1.43593e-05
		1504.5	1.44695e-05
		1506	1.45909e-05
		1507.5	1.47244e-05
		1509	1.48707e-05
		1510.5	1.50307e-05
		1512	1.52052e-05
		1513.5	1.53951e-05
		1515	1.56015e-05
		1516.5	1.58252e-05
		1518	1.60674e-05
		1519.5	1.63291e-05
		1521	1.66115e-05
		1522.5	1.69158e-05
		1524	1.72431e-05
		1525.5	1.75946e-05
		1527	1.79717e-05
		1528.5	1.83755e-05
		1530	1.88074e-05
		1531.5	1.92686e-05
		1533	1.97604e-05
		1534.5	2.02841e-05
		1536	2.08409e-05
		1537.5	2.14321e-05
		1539	2.20589e-05
		1540.5	2.27224e-05
		1542	2.34237e-05
		1543.5	2.41639e-05
		1545	2.4944e-05
		1546.5	2.57649e-05
		1548	2.66272e-05
		1549.5	2.75319e-05
		1551	2.84793e-05
		1552.5	2.947e-05
		1554	3.05043e-05
		1555.5	3.15823e-05
		1557	3.27041e-05
		1558.5	3.38694e-05
		1560	3.50704e-05
		1561.5	3.63223e-05
		1563	3.76162e-05
		1564.5	3.8951e-05
		1566	4.03255e-05
		1567.5	4.17385e-05
		1569	4.31883e-05
		1570.5	4.46731e-05
		1572	4.61909e-05
		1573.5	4.77393e-05
		1575	4.93159e-05
		1576.5	5.09179e-05
		1578	5.25424e-05
		1579.5	5.41862e-05
		1581	5.58458e-05
		1582.5	5.75177e-05
		1584	5.91981e-05
		1585.5	6.08829e-05
		1587	6.25682e-05
		1588.5	6.42494e-05
		1590	6.59223e-05
		1591.5	6.75823e-05
		1593	6.92246e-05
		1594.5	7.08446e-05
		1596	7.24375e-05
		1597.5	7.39983e-05
		1599	7.55224e-05
		1600.5	7.70048e-05
		1602	7.84408e-05
		1603.5	7.98256e-05
		1605	8.11547e-05
		1606.5	8.24233e-05
		1608	8.36273e-05
		1609.5	8.47623e-05
		1611	8.58244e-05
		1612.5	8.68096e-05
		1614	8.77145e-05
		1615.5	8.85357e-05
		1617	8.92701e-05
		1618.5	8.9915e-05
		1620	9.04679e-05
		1621.5	9.09267e-05
		1623	9.12985e-05
		1624.5	9.15653e-05
		1626	9.17338e-05
		1627.5	9.18035e-05
		1629	9.17739e-05
		1630.5	9.16451e-05
		1632	9.14176e-05
		1633.5	9.10922e-05
		1635	9.067e-05
		1636.5	9.01526e-05
		1638	8.95418e-05
		1639.5	8.884e-05
		1641	8.80496e-05
		1642.5	8.71735e-05
		1644	8.62149e-05
		1645.5	8.51772e-05
		1647	8.4064e-05
		1648.5	8.28794e-05
		1650	8.16274e-05
		1651.5	8.03124e-05
		1653	7.89389e-05
		1654.5	7.75114e-05
		1656	7.60348e-05
		1657.5	7.45137e-05
		1659	7.29532e-05
		1660.5	7.13582e-05
		1662	6.97336e-05
		1663.5	6.80842e-05
		1665	6.64152e-05
		1666.5	6.47312e-05
		1668	6.3037e-05
		1669.5	6.13374e-05
		1671	5.96368e-05
		1672.5	5.79397e-05
		1674	5.62504e-05
		1675.5	5.4573e-05
		1677	5.29114e-05
		1678.5	5.12693e-05
		1680	4.96505e-05
		1681.5	4.80581e-05
		1683	4.64953e-05
		1684.5	4.49651e-05
		1686	4.34703e-05
		1687.5	4.20131e-05
		1689	4.05961e-05
		1690.5	3.92212e-05
		1692	3.78903e-05
		1693.5	3.6605e-05
		1695	3.53667e-05
		1696.5	3.41768e-05
		1698	3.30362e-05
		1699.5	3.19458e-05
		1701	3.09064e-05
		1702.5	2.99267e-05
		1704	2.89921e-05
		1705.5	2.81098e-05
		1707	2.72799e-05
		1708.5	2.65025e-05
		1710	2.57775e-05
		1711.5	2.51047e-05
		1713	2.44838e-05
		1714.5	2.39145e-05
		1716	2.33964e-05
		1717.5	2.29291e-05
		1719	2.2512e-05
		1720.5	2.21447e-05
		1722	2.18266e-05
		1723.5	2.15571e-05
		1725	2.13358e-05
		1726.5	2.11715e-05
		1728	2.10464e-05
		1729.5	2.09682e-05
		1731	2.09364e-05
		1732.5	2.09506e-05
		1734	2.10104e-05
		1735.5	2.11157e-05
		1737	2.12662e-05
		1738.5	2.14617e-05
		1740	2.17022e-05
		1741.5	2.19877e-05
		1743	2.23182e-05
		1744.5	2.26939e-05
		1746	2.31151e-05
		1747.5	2.35821e-05
		1749	2.40954e-05
		1750.5	2.46554e-05
		1752	2.52629e-05
		1753.5	2.59184e-05
		1755	2.66229e-05
		1756.5	2.73772e-05
		1758	2.81823e-05
		1759.5	2.90394e-05
		1761	2.99497e-05
		1762.5	3.09143e-05
		1764	3.19347e-05
		1765.5	3.30123e-05
		1767	3.41486e-05
		1768.5	3.53452e-05
		1770	3.66037e-05
		1771.5	3.79259e-05
		1773	3.93134e-05
		1774.5	4.0768e-05
		1776	4.22916e-05
		1777.5	4.38859e-05
		1779	4.55526e-05
		1780.5	4.72936e-05
		1782	4.91105e-05
		1783.5	5.10051e-05
		1785	5.29789e-05
		1786.5	5.50333e-05
		1788	5.71698e-05
		1789.5	5.93896e-05
		1791	6.16938e-05
		1792.5	6.40831e-05
		1794	6.65584e-05
		1795.5	6.912e-05
		1797	7.17681e-05
		1798.5	7.45026e-05
		1800	7.7323e-05
		1801.5	8.02287e-05
		1803	8.32185e-05
		1804.5	8.6291e-05
		1806	8.94443e-05
		1807.5	9.26761e-05
		1809	9.59754e-05
		1810.5	9.93568e-05
		1812	0.000102807
		1813.5	0.000106322
		1815	0.000109898
		1816.5	0.000113528
		1818	0.000117209
		1819.5	0.000120933
		1821	0.000124695
		1822.5	0.000128487
		1824	0.000132303
		1825.5	0.000136134
		1827	0.000139973
		1828.5	0.00014381
		1830	0.000147638
		1831.5	0.000151446
		1833	0.000155226
		1834.5	0.000158968
		1836	0.000162662
		1837.5	0.000166298
		1839	0.000169866
		1840.5	0.000173356
		1842	0.000176758
		1843.5	0.000180062
		1845	0.000183258
		1846.5	0.000186337
		1848	0.000189288
		1849.5	0.000192103
		1851	0.000194773
		1852.5	0.000197289
		1854	0.000199643
		1855.5	0.000201828
		1857	0.000203837
		1858.5	0.000205663
		1860	0.000207299
		1861.5	0.000208742
		1863	0.000209986
		1864.5	0.000211027
		1866	0.000211862
		1867.5	0.000212488
		1869	0.000212903
		1870.5	0.000213107
		1872	0.000213098
		1873.5	0.000212877
		1875	0.000212446
		1876.5	0.000211805
		1878	0.000210957
		1879.5	0.000209905
		1881	0.000208652
		1882.5	0.000207203
		1884	0.000205563
		1885.5	0.000203736
		1887	0.00020173
		1888.5	0.000199549
		1890	0.000197201
		1891.5	0.000194692
		1893	0.000192031
		1894.5	0.000189225
		1896	0.000186282
		1897.5	0.000183211
		1899	0.00018002
		1900.5	0.000176716
		1902	0.000173311
		1903.5	0.000169811
		1905	0.000166226
		1906.5	0.000162565
		1908	0.000158836
		1909.5	0.000155048
		1911	0.000151211
		1912.5	0.000147332
		1914	0.00014342
		1915.5	0.000139483
		1917	0.000135529
		1918.5	0.000131566
		1920	0.000127602
		1921.5	0.000123644
		1923	0.000119699
		1924.5	0.000115773
		1926	0.000111874
		1927.5	0.000108008
		1929	0.00010418
		1930.5	0.000100396
		1932	9.66615e-05
		1933.5	9.29813e-05
		1935	8.936e-05
		1936.5	8.5802e-05
		1938	8.23111e-05
		1939.5	7.8891e-05
		1941	7.5545e-05
		1942.5	7.22761e-05
		1944	6.90868e-05
		1945.5	6.59796e-05
		1947	6.29563e-05
		1948.5	6.00188e-05
		1950	5.71685e-05
		1951.5	5.44063e-05
		1953	5.17332e-05
		1954.5	4.91497e-05
		1956	4.66561e-05
		1957.5	4.42524e-05
		1959	4.19384e-05
		1960.5	3.97136e-05
		1962	3.75774e-05
		1963.5	3.5529e-05
		1965	3.35671e-05
		1966.5	3.16907e-05
		1968	2.98982e-05
		1969.5	2.81882e-05
		1971	2.65588e-05
		1972.5	2.50084e-05
		1974	2.35348e-05
		1975.5	2.21361e-05
		1977	2.08102e-05
		1978.5	1.95548e-05
		1980	1.83676e-05
		1981.5	1.72463e-05
		1983	1.61886e-05
		1984.5	1.51921e-05
		1986	1.42543e-05
		1987.5	1.33729e-05
		1989	1.25454e-05
		1990.5	1.17695e-05
		1992	1.10428e-05
		1993.5	1.03628e-05
		1995	9.7274e-06
		1996.5	9.13423e-06
		1998	8.58108e-06
		1999.5	8.06578e-06
		2001	7.58624e-06
		2002.5	7.1404e-06
		2004	6.72628e-06
		2005.5	6.34198e-06
		2007	5.98564e-06
		2008.5	5.6555e-06
		2010	5.34985e-06
		2011.5	5.06709e-06
		2013	4.80566e-06
		2014.5	4.56409e-06
		2016	4.34097e-06
		2017.5	4.13499e-06
		2019	3.94488e-06
		2020.5	3.76946e-06
		2022	3.59962e-06
		2023.5	3.4516e-06
		2025	3.31492e-06
		2026.5	3.18869e-06
		2028	3.07208e-06
		2029.5	2.9643e-06
		2031	2.86464e-06
		2032.5	2.7724e-06
		2034	2.68695e-06
		2035.5	2.60772e-06
		2037	2.53416e-06
		2038.5	2.46578e-06
		2040	2.4021e-06
		2041.5	2.34271e-06
		2043	2.28721e-06
		2044.5	2.23526e-06
		2046	2.18651e-06
		2047.5	2.14068e-06
		2049	2.09749e-06
		2050.5	2.0567e-06
		2052	2.01806e-06
		2053.5	1.98139e-06
		2055	1.94649e-06
		2056.5	1.9132e-06
		2058	1.88136e-06
		2059.5	1.85084e-06
		2061	1.82152e-06
		2062.5	1.79327e-06
		2064	1.76601e-06
		2065.5	1.73964e-06
		2067	1.71409e-06
		2068.5	1.68927e-06
		2070	1.66514e-06
		2071.5	1.63367e-06
		2073	1.61162e-06
		2074.5	1.58999e-06
		2076	1.56153e-06
		2077.5	1.54173e-06
		2079	1.52214e-06
		2080.5	1.50273e-06
		2082	1.48352e-06
		2083.5	1.46449e-06
		2085	1.44566e-06
		2086.5	1.42701e-06
		2088	1.40855e-06
		2089.5	1.39028e-06
		2091	1.3722e-06
		2092.5	1.3543e-06
		2094	1.33658e-06
		2095.5	1.31904e-06
		2097	1.30169e-06
		2098.5	1.28451e-06
		2100	1.26752e-06
		2101.5	1.2507e-06
		2103	1.23406e-06
		2104.5	1.2176e-06
		2106	1.20131e-06
		2107.5	1.18519e-06
		2109	1.16925e-06
		2110.5	1.15347e-06
		2112	1.13787e-06
		2113.5	1.12244e-06
		2115	1.10717e-06
		2116.5	1.09207e-06
		2118	1.07714e-06
		2119.5	1.06237e-06
		2121	1.04776e-06
		2122.5	1.03332e-06
		2124	1.01904e-06
		2125.5	1.00491e-06
		2127	9.90946e-07
		2128.5	9.77139e-07
		2130	9.63487e-07
		2131.5	9.49991e-07
		2133	9.36649e-07
		2134.5	9.23459e-07
		2136	9.10421e-07
		2137.5	8.97533e-07
		2139	8.84795e-07
		2140.5	8.72205e-07
		2142	8.59761e-07
		2143.5	8.47464e-07
		2145	8.35311e-07
		2146.5	8.23301e-07
		2148	8.11433e-07
		2149.5	7.99707e-07
		2151	7.8812e-07
		2152.5	7.76673e-07
		2154	7.65362e-07
		2155.5	7.54189e-07
		2157	7.4315e-07
		2158.5	7.32246e-07
		2160	7.21474e-07
		2161.5	7.10834e-07
		2163	7.00325e-07
		2164.5	6.89946e-07
		2166	6.79694e-07
		2167.5	6.6957e-07
		2169	6.59572e-07
		2170.5	6.49699e-07
		2172	6.3995e-07
		2173.5	6.30323e-07
		2175	6.20818e-07
		2176.5	6.11433e-07
		2178	6.02168e-07
		2179.5	5.93021e-07
		2181	5.8399e-07
		2182.5	5.75076e-07
		2184	5.66276e-07
		2185.5	5.57591e-07
		2187	5.49018e-07
		2188.5	5.40556e-07
		2190	5.32205e-07
		2191.5	5.23963e-07
		2193	5.1583e-07
		2194.5	5.07803e-07
		2196	4.99883e-07
		2197.5	4.92068e-07
		2199	4.84357e-07
		2200.5	4.76749e-07
		2202	4.69243e-07
		2203.5	4.61837e-07
		2205	4.54532e-07
		2206.5	4.47325e-07
		2208	4.40216e-07
		2209.5	4.33204e-07
		2211	4.26287e-07
		2212.5	4.19465e-07
		2214	4.12737e-07
		2215.5	4.06101e-07
		2217	3.99558e-07
		2218.5	3.93104e-07
		2220	3.86741e-07
		2221.5	3.80466e-07
		2223	3.74279e-07
		2224.5	3.68179e-07
		2226	3.62165e-07
		2227.5	3.56236e-07
		2229	3.5039e-07
		2230.5	3.44628e-07
		2232	3.38947e-07
		2233.5	3.33348e-07
		2235	3.27829e-07
		2236.5	3.22389e-07
		2238	3.17028e-07
		2239.5	3.11744e-07
		2241	3.06536e-07
		2242.5	3.01405e-07
		2244	2.96348e-07
		2245.5	2.91365e-07
		2247	2.86455e-07
		2248.5	2.81617e-07
		2250	2.7685e-07
		2251.5	2.72154e-07
		2253	2.67528e-07
		2254.5	2.6297e-07
		2256	2.58481e-07
		2257.5	2.54058e-07
		2259	2.49702e-07
		2260.5	2.45411e-07
		2262	2.41185e-07
		2263.5	2.37023e-07
		2265	2.32924e-07
		2266.5	2.28887e-07
		2268	2.24912e-07
		2269.5	2.20997e-07
		2271	2.17143e-07
		2272.5	2.13347e-07
		2274	2.0961e-07
		2275.5	2.05931e-07
		2277	2.02309e-07
		2278.5	1.98743e-07
		2280	1.95233e-07
		2281.5	1.91777e-07
		2283	1.88376e-07
		2284.5	1.85028e-07
		2286	1.81733e-07
		2287.5	1.78489e-07
		2289	1.75297e-07
		2290.5	1.72156e-07
		2292	1.69064e-07
		2293.5	1.66022e-07
		2295	1.63029e-07
		2296.5	1.60083e-07
		2298	1.57185e-07
		2299.5	1.54333e-07
		2301	1.51528e-07
		2302.5	1.48767e-07
		2304	1.46052e-07
		2305.5	1.43381e-07
		2307	1.40753e-07
		2308.5	1.38169e-07
		2310	1.35627e-07
		2311.5	1.33126e-07
		2313	1.30667e-07
		2314.5	1.28248e-07
		2316	1.2587e-07
		2317.5	1.23531e-07
		2319	1.2123e-07
		2320.5	1.18969e-07
		2322	1.16745e-07
		2323.5	1.14558e-07
		2325	1.12408e-07
		2326.5	1.10294e-07
		2328	1.08216e-07
		2329.5	1.06173e-07
		2331	1.04165e-07
		2332.5	1.02191e-07
		2334	1.0025e-07
		2335.5	9.83431e-08
		2337	9.64685e-08
		2338.5	9.46261e-08
		2340	9.28154e-08
		2341.5	9.10359e-08
		2343	8.92871e-08
		2344.5	8.75687e-08
		2346	8.58802e-08
		2347.5	8.4221e-08
		2349	8.25908e-08
		2350.5	8.09891e-08
		2352	7.94155e-08
		2353.5	7.78695e-08
		2355	7.63508e-08
		2356.5	7.48589e-08
		2358	7.33934e-08
		2359.5	7.19538e-08
		2361	7.05399e-08
		2362.5	6.91512e-08
		2364	6.77872e-08
		2365.5	6.64477e-08
		2367	6.51322e-08
		2368.5	6.38403e-08
		2370	6.25717e-08
		2371.5	6.13261e-08
		2373	6.01029e-08
		2374.5	5.8902e-08
		2376	5.77229e-08
		2377.5	5.65652e-08
		2379	5.54287e-08
		2380.5	5.4313e-08
		2382	5.32178e-08
		2383.5	5.21427e-08
		2385	5.10874e-08
		2386.5	5.00516e-08
		2388	4.90349e-08
		2389.5	4.80371e-08
		2391	4.70578e-08
		2392.5	4.60968e-08
		2394	4.51536e-08
		2395.5	4.42282e-08
		2397	4.332e-08
		2398.5	4.2429e-08
		2400	4.15547e-08
		2401.5	4.06969e-08
		2403	3.98553e-08
		2404.5	3.90296e-08
		2406	3.82196e-08
		2407.5	3.7425e-08
		2409	3.66456e-08
		2410.5	3.5881e-08
		2412	3.51311e-08
		2413.5	3.43956e-08
		2415	3.36742e-08
		2416.5	3.29667e-08
		2418	3.22728e-08
		2419.5	3.15924e-08
		2421	3.09251e-08
		2422.5	3.02708e-08
		2424	2.96293e-08
		2425.5	2.90002e-08
		2427	2.83835e-08
		2428.5	2.77788e-08
		2430	2.7186e-08
		2431.5	2.66048e-08
		2433	2.60351e-08
		2434.5	2.54766e-08
		2436	2.49292e-08
		2437.5	2.43926e-08
		2439	2.38667e-08
		2440.5	2.33512e-08
		2442	2.2846e-08
		2443.5	2.23509e-08
		2445	2.18657e-08
		2446.5	2.13903e-08
		2448	2.09244e-08
		2449.5	2.04678e-08
		2451	2.00205e-08
		2452.5	1.95822e-08
		2454	1.91528e-08
		2455.5	1.87321e-08
		2457	1.832e-08
		2458.5	1.79163e-08
		2460	1.75208e-08
		2461.5	1.71334e-08
		2463	1.67539e-08
		2464.5	1.63822e-08
		2466	1.60182e-08
		2467.5	1.56616e-08
		2469	1.53125e-08
		2470.5	1.49705e-08
		2472	1.46357e-08
		2473.5	1.43077e-08
		2475	1.39867e-08
		2476.5	1.36723e-08
		2478	1.33644e-08
		2479.5	1.3063e-08
		2481	1.2768e-08
		2482.5	1.24791e-08
		2484	1.21963e-08
		2485.5	1.19195e-08
		2487	1.16485e-08
		2488.5	1.13832e-08
		2490	1.11236e-08
		2491.5	1.08695e-08
		2493	1.06208e-08
		2494.5	1.03774e-08
		2496	1.01392e-08
		2497.5	9.90604e-09
		2499	9.67792e-09
		2500.5	9.4547e-09
		2502	9.23629e-09
		2503.5	9.02258e-09
		2505	1.80293e-08
		2506.5	1.93837e-08
		2508	2.09892e-08
		2509.5	1.46688e-08
		2511	1.70806e-08
		2512.5	1.98621e-08
		2514	2.30652e-08
		2515.5	2.67486e-08
		2517	3.09782e-08
		2518.5	3.58279e-08
		2520	4.13808e-08
		2521.5	4.77296e-08
		2523	5.49779e-08
		2524.5	6.32412e-08
		2526	7.26478e-08
		2527.5	8.33406e-08
		2529	9.54778e-08
		2530.5	1.19633e-07
		2532	1.38323e-07
		2533.5	1.59911e-07
		2535	1.84856e-07
		2536.5	2.23162e-07
		2538	2.58224e-07
		2539.5	2.98807e-07
		2541	3.45795e-07
		2542.5	4.00211e-07
		2544	4.63241e-07
		2545.5	5.36256e-07
		2547	6.20837e-07
		2548.5	7.18804e-07
		2550	8.32252e-07
		2551.5	9.63575e-07
		2553	1.11551e-06
		2554.5	1.29118e-06
		2556	1.49411e-06
		2557.5	1.7283e-06
		2559	1.99826e-06
		2560.5	2.30902e-06
		2562	2.66622e-06
		2563.5	3.0761e-06
		2565	3.54559e-06
		2566.5	4.08227e-06
		2568	4.69445e-06
		2569.5	5.39118e-06
		2571	6.18219e-06
		2572.5	7.07796e-06
		2574	8.08964e-06
		2575.5	9.22904e-06
		2577	1.05085e-05
		2578.5	1.1941e-05
		2580	1.35397e-05
		2581.5	1.53182e-05
		2583	1.72901e-05
		2584.5	1.94691e-05
		2586	2.18683e-05
		2587.5	2.45007e-05
		2589	2.73783e-05
		2590.5	3.05121e-05
		2592	3.3912e-05
		2593.5	3.75861e-05
		2595	4.15409e-05
		2596.5	4.57805e-05
		2598	5.03066e-05
		2599.5	5.51184e-05
		2601	6.0212e-05
		2602.5	6.55804e-05
		2604	7.12134e-05
		2605.5	7.7097e-05
		2607	8.32141e-05
		2608.5	8.95439e-05
		2610	9.60621e-05
		2611.5	0.000102741
		2613	0.00010955
		2614.5	0.000116456
		2616	0.000123422
		2617.5	0.000130411
		2619	0.000137381
		2620.5	0.000144293
		2622	0.000151104
		2623.5	0.000157772
		2625	0.000164257
		2626.5	0.000170518
		2628	0.000176518
		2629.5	0.00018222
		2631	0.000187592
		2632.5	0.000192605
		2634	0.000197233
		2635.5	0.000201456
		2637	0.000205258
		2638.5	0.000208626
		2640	0.000211554
		2641.5	0.000214042
		2643	0.000216091
		2644.5	0.000217711
		2646	0.000218913
		2647.5	0.000219715
		2649	0.000220137
		2650.5	0.000220202
		2652	0.000219936
		2653.5	0.000219369
		2655	0.000218529
		2656.5	0.000217448
		2658	0.000216157
		2659.5	0.000214686
		2661	0.000213066
		2662.5	0.000211325
		2664	0.000209491
		2665.5	0.000207588
		2667	0.00020564
		2668.5	0.000203665
		2670	0.000201682
		2671.5	0.000199703
		2673	0.00019774
		2674.5	0.000195802
		2676	0.000193892
		2677.5	0.000192014
		2679	0.000190168
		2680.5	0.00018835
		2682	0.000186557
		2683.5	0.000184782
		2685	0.000183017
		2686.5	0.000181254
		2688	0.000179482
		2689.5	0.000177692
		2691	0.000175873
		2692.5	0.000174013
		2694	0.000172104
		2695.5	0.000170135
		2697	0.000168096
		2698.5	0.00016598
		2700	0.000163779
		2701.5	0.000161487
		2703	0.000159099
		2704.5	0.000156612
		2706	0.000154022
		2707.5	0.000151328
		2709	0.000148531
		2710.5	0.000145632
		2712	0.000142632
		2713.5	0.000139537
		2715	0.000136349
		2716.5	0.000133075
		2718	0.000129721
		2719.5	0.000126294
		2721	0.000122801
		2722.5	0.000119252
		2724	0.000115653
		2725.5	0.000112015
		2727	0.000108347
		2728.5	0.000104657
		2730	0.000100956
		2731.5	9.72521e-05
		2733	9.35553e-05
		2734.5	8.98744e-05
		2736	8.6218e-05
		2737.5	8.25948e-05
		2739	7.90127e-05
		2740.5	7.54794e-05
		2742	7.20022e-05
		2743.5	6.85879e-05
		2745	6.52425e-05
		2746.5	6.19719e-05
		2748	5.87747e-05
		2749.5	5.567e-05
		2751	5.26536e-05
		2752.5	4.97289e-05
		2754	4.68989e-05
		2755.5	4.41662e-05
		2757	4.15327e-05
		2758.5	3.89997e-05
		2760	3.65682e-05
		2761.5	3.42386e-05
		2763	3.20108e-05
		2764.5	2.98846e-05
		2766	2.78591e-05
		2767.5	2.5933e-05
		2769	2.4105e-05
		2770.5	2.23731e-05
		2772	2.07354e-05
		2773.5	1.91895e-05
		2775	1.77329e-05
		2776.5	1.63629e-05
		2778	1.50766e-05
		2779.5	1.38711e-05
		2781	1.27433e-05
		2782.5	1.169e-05
		2784	1.0708e-05
		2785.5	9.79405e-06
		2787	8.94496e-06
		2788.5	8.15746e-06
		2790	7.42833e-06
		2791.5	6.75441e-06
		2793	6.13257e-06
		2794.5	5.55977e-06
		2796	5.03303e-06
		2797.5	4.54946e-06
		2799	4.10627e-06
		2800.5	3.70078e-06
		2802	3.3304e-06
		2803.5	2.99264e-06
		2805	2.68516e-06
		2806.5	2.4057e-06
		2808	2.15213e-06
		2809.5	1.92244e-06
		2811	1.71471e-06
		2812.5	1.52715e-06
		2814	1.3581e-06
		2815.5	1.20596e-06
		2817	1.06927e-06
		2818.5	9.4667e-07
		2820	8.36878e-07
		2821.5	7.38719e-07
		2823	6.51103e-07
		2824.5	5.73025e-07
		2826	5.03559e-07
		2827.5	4.41854e-07
		2829	3.87134e-07
		2830.5	3.38684e-07
		2832	2.95857e-07
		2833.5	2.58059e-07
		2835	2.24755e-07
		2836.5	1.95458e-07
		2838	1.69725e-07
		2839.5	1.47161e-07
		2841	1.27406e-07
		2842.5	1.10138e-07
		2844	9.50685e-08
		2845.5	8.19384e-08
		2847	7.05163e-08
		2848.5	6.05958e-08
		2850	5.19932e-08
		2851.5	4.45452e-08
		2853	3.81072e-08
		2854.5	2.51552e-08
		2856	2.14581e-08
		2857.5	1.82763e-08
		2859	1.55424e-08
		2860.5	1.31972e-08
		2862	1.11886e-08
		2863.5	9.47122e-09
		2865	0
		2866.5	0
		2868	0
		2869.5	0
		2871	0
		2872.5	0
		2874	0
		2875.5	0
		2877	0
		2878.5	0
		2880	0
		2881.5	0
		2883	0
		2884.5	0
		2886	0
		2887.5	0
		2889	0
		2890.5	0
		2892	0
		2893.5	0
		2895	0
		2896.5	0
		2898	0
		2899.5	0
		2901	0
		2902.5	0
		2904	0
		2905.5	0
		2907	0
		2908.5	0
		2910	0
		2911.5	0
		2913	0
		2914.5	0
		2916	0
		2917.5	0
		2919	0
		2920.5	0
		2922	0
		2923.5	0
		2925	0
		2926.5	0
		2928	0
		2929.5	0
		2931	0
		2932.5	0
		2934	0
		2935.5	0
		2937	0
		2938.5	0
		2940	0
		2941.5	0
		2943	0
		2944.5	0
		2946	0
		2947.5	0
		2949	0
		2950.5	0
		2952	0
		2953.5	0
		2955	0
		2956.5	0
		2958	0
		2959.5	0
		2961	0
		2962.5	0
		2964	0
		2965.5	0
		2967	0
		2968.5	0
		2970	0
		2971.5	0
		2973	0
		2974.5	0
		2976	0
		2977.5	0
		2979	0
		2980.5	0
		2982	0
		2983.5	0
		2985	0
		2986.5	0
		2988	0
		2989.5	0
		2991	0
		2992.5	0
		2994	0
		2995.5	0
		2997	0
		2998.5	0
[truncated: 1 more rows]

## Sheet: PlotDat22
Source sheet	Sheet2	0	0	400	0	0	0
Plot name	ProbDens7	1.5	0	480	0	2998.5	0
Plot Type	16	3	0	480	54
1st free col	9	4.5	0	400	54
Sigma Level	1	6	0	400	0
Absolute Errs	TRUE	7.5	0	ErrBox	ErrBox
Symbol Type	1	9	0	480	0
Inverse Plot	FALSE	10.5	0	560	0
Color Plot	TRUE	12	0	560	36
3D plot	FALSE	13.5	0	480	36
Linear	FALSE	15	0	480	0
Data Range	S4:T123	16.5	0	ErrBox	ErrBox
Filled Symbols	TRUE	18	0	560	0
ConcAge	FALSE	19.5	0	640	0
ConcSwap	FALSE	21	0	640	7
1st Symbol-row	1	22.5	0	560	7
		24	0	560	0
		25.5	0	ErrBox	ErrBox
		27	0	640	0
		28.5	0	720	0
		30	0	720	4
		31.5	0	640	4
		33	0	640	0
		34.5	0	ErrBox	ErrBox
		36	0	720	0
		37.5	0	800	0
		39	0	800	3
		40.5	0	720	3
		42	0	720	0
		43.5	0	ErrBox	ErrBox
		45	0	800	0
		46.5	0	880	0
		48	0	880	1
		49.5	0	800	1
		51	0	800	0
		52.5	0	ErrBox	ErrBox
		54	0	960	0
		55.5	0	1040	0
		57	0	1040	1
		58.5	0	960	1
		60	0	960	0
		61.5	0	ErrBox	ErrBox
		63	0	1040	0
		64.5	0	1120	0
		66	0	1120	3
		67.5	0	1040	3
		69	0	1040	0
		70.5	0	ErrBox	ErrBox
		72	0	1120	0
		73.5	0	1200	0
		75	0	1200	1
		76.5	0	1120	1
		78	0	1120	0
		79.5	0	ErrBox	ErrBox
		81	0	1280	0
		82.5	0	1360	0
		84	0	1360	2
		85.5	0	1280	2
		87	0	1280	0
		88.5	0	ErrBox	ErrBox
		90	0	1520	0
		91.5	0	1600	0
		93	0	1600	1
		94.5	0	1520	1
		96	0	1520	0
		97.5	0	ErrBox	ErrBox
		99	0	1600	0
		100.5	0	1680	0
		102	0	1680	1
		103.5	0	1600	1
		105	0	1600	0
		106.5	0	ErrBox	ErrBox
		108	0	1840	0
		109.5	0	1920	0
		111	0	1920	3
		112.5	0	1840	3
		114	0	1840	0
		115.5	0	ErrBox	ErrBox
		117	0	2560	0
		118.5	0	2640	0
		120	0	2640	1
		121.5	0	2560	1
		123	0	2560	0
		124.5	0	ErrBox	ErrBox
		126	0	2640	0
		127.5	0	2720	0
		129	0	2720	2
		130.5	0	2640	2
		132	0	2640	0
		133.5	0	ErrBox	ErrBox
		135	0
		136.5	0
		138	0
		139.5	0
		141	0
		142.5	0
		144	0
		145.5	0
		147	0
		148.5	0
		150	0
		151.5	0
		153	0
		154.5	0
		156	0
		157.5	0
		159	0
		160.5	0
		162	0
		163.5	0
		165	0
		166.5	0
		168	0
		169.5	0
		171	0
		172.5	0
		174	0
		175.5	0
		177	0
		178.5	0
		180	0
		181.5	0
		183	0
		184.5	0
		186	0
		187.5	0
		189	0
		190.5	0
		192	0
		193.5	0
		195	0
		196.5	0
		198	0
		199.5	0
		201	0
		202.5	0
		204	0
		205.5	0
		207	0
		208.5	0
		210	8.42784e-09
		211.5	9.37283e-09
		213	1.04171e-08
		214.5	1.15701e-08
		216	1.28426e-08
		217.5	1.42458e-08
		219	1.57921e-08
		220.5	1.74949e-08
		222	1.93689e-08
		223.5	2.14298e-08
		225	2.36947e-08
		226.5	2.61821e-08
		228	2.89119e-08
		229.5	3.19057e-08
		231	3.51869e-08
		232.5	3.87804e-08
		234	4.27134e-08
		235.5	4.70149e-08
		237	5.17162e-08
		238.5	5.6851e-08
		240	6.24553e-08
		241.5	6.85677e-08
		243	7.52299e-08
		244.5	8.24861e-08
		246	9.03839e-08
		247.5	9.89741e-08
		249	1.08311e-07
		250.5	1.18452e-07
		252	1.29459e-07
		253.5	1.41397e-07
		255	1.54337e-07
		256.5	1.68352e-07
		258	1.83522e-07
		259.5	1.99929e-07
		261	2.17663e-07
		262.5	2.36817e-07
		264	2.57491e-07
		265.5	2.79788e-07
		267	3.03821e-07
		268.5	3.29705e-07
		270	3.57563e-07
		271.5	3.87526e-07
		273	4.19728e-07
		274.5	4.54313e-07
		276	4.9143e-07
		277.5	5.31237e-07
		279	5.73898e-07
		280.5	6.19586e-07
		282	6.68479e-07
		283.5	7.20765e-07
		285	7.76639e-07
		286.5	8.36306e-07
		288	8.99975e-07
		289.5	9.67868e-07
		291	1.04021e-06
		292.5	1.11724e-06
		294	1.1992e-06
		295.5	1.28634e-06
		297	1.37892e-06
		298.5	1.47722e-06
		300	1.5815e-06
		301.5	1.69205e-06
		303	1.80916e-06
		304.5	1.93313e-06
		306	2.06426e-06
		307.5	2.20286e-06
		309	2.34925e-06
		310.5	2.50376e-06
		312	2.66671e-06
		313.5	2.83843e-06
		315	3.01926e-06
		316.5	3.20954e-06
		318	3.40961e-06
		319.5	3.61982e-06
		321	3.84051e-06
		322.5	4.07202e-06
		324	4.31471e-06
		325.5	4.56891e-06
		327	4.83497e-06
		328.5	5.11323e-06
		330	5.404e-06
		331.5	5.70764e-06
		333	6.02444e-06
		334.5	6.35473e-06
		336	6.6988e-06
		337.5	7.05694e-06
		339	7.42945e-06
		340.5	7.81656e-06
		342	8.21855e-06
		343.5	8.63564e-06
		345	9.06804e-06
		346.5	9.51595e-06
		348	9.97955e-06
		349.5	1.0459e-05
		351	1.09544e-05
		352.5	1.14658e-05
		354	1.19934e-05
		355.5	1.25372e-05
		357	1.30972e-05
		358.5	1.36734e-05
		360	1.42657e-05
		361.5	1.48741e-05
		363	1.54985e-05
		364.5	1.61386e-05
		366	1.67943e-05
		367.5	1.74654e-05
		369	1.81516e-05
		370.5	1.88526e-05
		372	1.9568e-05
		373.5	2.02975e-05
		375	2.10406e-05
		376.5	2.17968e-05
		378	2.25657e-05
		379.5	2.33466e-05
		381	2.4139e-05
		382.5	2.49421e-05
		384	2.57554e-05
		385.5	2.6578e-05
		387	2.74092e-05
		388.5	2.82482e-05
		390	2.90941e-05
		391.5	2.9946e-05
		393	3.08029e-05
		394.5	3.16729e-05
		396	3.25399e-05
		397.5	3.34194e-05
		399	3.42966e-05
		400.5	3.51944e-05
		402	3.61418e-05
		403.5	3.72823e-05
		405	3.91015e-05
		406.5	4.28409e-05
		408	5.15264e-05
		409.5	7.11538e-05
		411	0.000111474
		412.5	0.000184688
		414	0.000300546
		415.5	0.000458426
		417	0.000641094
		418.5	0.000816842
		420	0.000953259
		421.5	0.00103714
		423	0.00108716
		424.5	0.00114758
		426	0.00126277
		427.5	0.0014458
		429	0.00166329
		430.5	0.00185219
		432	0.00196332
		433.5	0.00200118
		435	0.00202822
		436.5	0.00212879
		438	0.00236095
		439.5	0.00272916
		441	0.00319011
		442.5	0.00367916
		444	0.00413885
		445.5	0.00453716
		447	0.0048714
		448.5	0.00515888
		450	0.00542119
		451.5	0.00567355
		453	0.00592832
		454.5	0.00621233
		456	0.00658268
		457.5	0.0071214
		459	0.00790111
		460.5	0.00893726
		462	0.0101593
		463.5	0.0114303
		465	0.0126142
		466.5	0.0136506
		468	0.014574
		469.5	0.0154518
		471	0.016284
		472.5	0.0169562
		474	0.0172938
		475.5	0.0171736
		477	0.0165999
		478.5	0.0156913
		480	0.0146076
		481.5	0.0134813
		483	0.01239
		484.5	0.0113645
		486	0.0104091
		487.5	0.00951892
		489	0.00869032
		490.5	0.0079245
		492	0.00722599
		493.5	0.00659975
		495	0.00605008
		496.5	0.00558238
		498	0.00520602
		499.5	0.00493427
		501	0.00477845
		502.5	0.0047367
		504	0.00478334
		505.5	0.00486649
		507	0.00491974
		508.5	0.00488508
		510	0.00473456
		511.5	0.00447716
		513	0.00414625
		514.5	0.00377687
		516	0.00338919
		517.5	0.00298879
		519	0.00258016
		520.5	0.00218023
		522	0.00182083
		523.5	0.00153794
		525	0.0013557
		526.5	0.00127488
		528	0.00127243
		529.5	0.00131133
		531	0.00135553
		532.5	0.00138275
		534	0.00139009
		535.5	0.00139132
		537	0.00140833
		538.5	0.00146022
		540	0.00155357
		541.5	0.0016763
		543	0.00179791
		544.5	0.00187783
		546	0.0018804
		547.5	0.00179004
		549	0.00161844
		550.5	0.0013995
		552	0.0011752
		553.5	0.000980433
		555	0.000834048
		556.5	0.000738129
		558	0.000682651
		559.5	0.00065181
		561	0.000629255
		562.5	0.000601694
		564	0.000560886
		565.5	0.000504274
		567	0.000434374
		568.5	0.000357093
		570	0.000279713
		571.5	0.000208791
		573	0.000148951
		574.5	0.000102442
		576	6.95103e-05
		577.5	4.92587e-05
		579	4.06126e-05
		580.5	4.3159e-05
		582	5.75723e-05
		583.5	8.56666e-05
		585	0.000129975
		586.5	0.000192892
		588	0.000275525
		589.5	0.000376504
		591	0.000491114
		592.5	0.000611068
		594	0.000725317
		595.5	0.000821721
		597	0.000889235
		598.5	0.000920177
		600	0.000911742
		601.5	0.000866496
		603	0.000791624
		604.5	0.000697547
		606	0.000596104
		607.5	0.000498938
		609	0.000416423
		610.5	0.000357051
		612	0.000327108
		613.5	0.0003304
		615	0.000367855
		616.5	0.000437123
		618	0.000532364
		619.5	0.000644765
		621	0.000763751
		622.5	0.000878883
		624	0.000981863
		625.5	0.00106794
		627	0.00113614
		628.5	0.00118828
		630	0.00122711
		631.5	0.00125443
		633	0.00126989
		634.5	0.00127099
		636	0.00125412
		637.5	0.00121625
		639	0.00115649
		640.5	0.00107714
		642	0.00098388
		643.5	0.000885054
		645	0.00079048
		646.5	0.000709966
		648	0.000651935
		649.5	0.00062237
		651	0.000624194
		652.5	0.000657095
		654	0.000717741
		655.5	0.000800301
		657	0.000897068
		658.5	0.000999207
		660	0.00109746
		661.5	0.00118286
		663	0.00124743
		664.5	0.00128494
		666	0.00129158
		667.5	0.00126651
		669	0.00121204
		670.5	0.00113332
		672	0.00103752
		673.5	0.000932626
		675	0.000826131
		676.5	0.000724095
		678	0.000630389
		679.5	0.000546778
		681	0.000473284
		682.5	0.000408825
		684	0.000351884
		685.5	0.000301023
		687	0.000255171
		688.5	0.000213706
		690	0.000176373
		691.5	0.000143147
		693	0.000114072
		694.5	8.91453e-05
		696	6.8292e-05
		697.5	5.12429e-05
		699	3.76589e-05
		700.5	2.71112e-05
		702	1.91461e-05
		703.5	1.32995e-05
		705	9.15074e-06
		706.5	6.32856e-06
		708	4.55674e-06
		709.5	3.60831e-06
		711	3.33915e-06
		712.5	3.66895e-06
		714	4.60214e-06
		715.5	6.17547e-06
		717	8.48741e-06
		718.5	1.16798e-05
		720	1.59295e-05
		721.5	2.14382e-05
		723	2.84195e-05
		724.5	3.70753e-05
		726	4.76067e-05
		727.5	6.01384e-05
		729	7.47362e-05
		730.5	9.13694e-05
		732	0.00010989
		733.5	0.000130017
		735	0.00015133
		736.5	0.000173274
		738	0.000195175
		739.5	0.000216269
		741	0.000235747
		742.5	0.000252821
		744	0.00026671
		745.5	0.000276805
		747	0.00028262
		748.5	0.000283891
		750	0.000280579
		751.5	0.000272874
		753	0.000261195
		754.5	0.000246162
		756	0.000228561
		757.5	0.000209298
		759	0.000189358
		760.5	0.000169764
		762	0.000151537
		763.5	0.000135672
		765	0.000123116
		766.5	0.000114758
		768	0.000111409
		769.5	0.000113787
		771	0.00012249
		772.5	0.000137954
		774	0.000160409
		775.5	0.00018981
		777	0.000225783
		778.5	0.000267568
		780	0.000313989
		781.5	0.000363456
		783	0.000414002
		784.5	0.000463381
		786	0.000509195
		787.5	0.000549065
		789	0.000580814
		790.5	0.000602653
		792	0.000613332
		793.5	0.000612252
		795	0.000599513
		796.5	0.000575892
		798	0.000542765
		799.5	0.000501965
		801	0.000455615
		802.5	0.000405936
		804	0.000355106
		805.5	0.000305057
		807	0.000257414
		808.5	0.000213412
		810	0.000173884
		811.5	0.000139277
		813	0.00010971
		814.5	8.50149e-05
		816	6.48404e-05
		817.5	4.87073e-05
		819	3.60748e-05
		820.5	2.63929e-05
		822	1.91417e-05
		823.5	1.38581e-05
		825	1.01518e-05
		826.5	7.71371e-06
		828	6.31777e-06
		829.5	5.81979e-06
		831	6.15381e-06
		832.5	7.32745e-06
		834	9.41608e-06
		835.5	1.25648e-05
		837	1.6944e-05
		838.5	2.27796e-05
		840	3.03396e-05
		841.5	3.98571e-05
		843	5.15615e-05
		844.5	6.55986e-05
		846	8.20456e-05
		847.5	0.000100842
		849	0.000121792
		850.5	0.000144507
		852	0.000168428
		853.5	0.000192827
		855	0.000216835
		856.5	0.000239491
		858	0.000259798
		859.5	0.0002768
		861	0.000289652
		862.5	0.000297692
		864	0.0003005
		865.5	0.000297928
		867	0.000290122
		868.5	0.000277502
		870	0.000260729
		871.5	0.000240648
		873	0.000218215
		874.5	0.000194426
		876	0.000170245
		877.5	0.000146541
		879	0.000124042
		880.5	0.00010331
		882	8.47244e-05
		883.5	6.84943e-05
		885	5.46739e-05
		886.5	4.31907e-05
		888	3.3878e-05
		889.5	2.65067e-05
		891	2.08149e-05
		892.5	1.65326e-05
		894	1.34093e-05
		895.5	1.11924e-05
		897	9.68477e-06
		898.5	8.71466e-06
		900	8.14348e-06
		901.5	7.86277e-06
		903	7.79018e-06
		904.5	7.86497e-06
		906	8.04353e-06
		907.5	8.29541e-06
		909	8.59992e-06
		910.5	8.94342e-06
		912	9.31717e-06
		913.5	9.7158e-06
		915	1.01362e-05
		916.5	1.05721e-05
		918	1.1034e-05
		919.5	1.1514e-05
		921	1.20126e-05
		922.5	1.25306e-05
		924	1.30685e-05
		925.5	1.3627e-05
		927	1.42067e-05
		928.5	1.48083e-05
		930	1.54324e-05
		931.5	1.60797e-05
		933	1.6751e-05
		934.5	1.74469e-05
		936	1.81681e-05
		937.5	1.89153e-05
		939	1.97047e-05
		940.5	2.0522e-05
		942	2.13823e-05
		943.5	2.22982e-05
		945	2.32912e-05
		946.5	2.43958e-05
		948	2.56666e-05
		949.5	2.71875e-05
		951	2.90823e-05
		952.5	3.15282e-05
		954	3.47677e-05
		955.5	3.912e-05
		957	4.49852e-05
		958.5	5.28389e-05
		960	6.32118e-05
		961.5	7.66505e-05
		963	9.36579e-05
		964.5	0.000114614
		966	0.000139685
		967.5	0.000168733
		969	0.000201237
		970.5	0.000236248
		972	0.000272398
		973.5	0.00030796
		975	0.000340979
		976.5	0.000369448
		978	0.000391517
		979.5	0.000405703
		981	0.000411071
		982.5	0.000407346
		984	0.000394952
		985.5	0.000374955
		987	0.000348933
		988.5	0.000318787
		990	0.000286531
		991.5	0.000254085
		993	0.000223106
		994.5	0.000194874
		996	0.000170245
		997.5	0.00014965
		999	0.000133155
		1000.5	0.000120539
		1002	0.000111387
		1003.5	0.00010518
		1005	0.00010137
		1006.5	9.9435e-05
		1008	9.89136e-05
		1009.5	9.94223e-05
		1011	0.000100658
		1012.5	0.000102392
		1014	0.00010446
		1015.5	0.000106745
		1017	0.000109169
		1018.5	0.000111682
		1020	0.000114251
		1021.5	0.000116855
		1023	0.000119481
		1024.5	0.000122115
		1026	0.000124765
		1027.5	0.000127417
		1029	0.000130068
		1030.5	0.000132715
		1032	0.000135355
		1033.5	0.000137985
		1035	0.000140602
		1036.5	0.000143204
		1038	0.000145787
		1039.5	0.000148348
		1041	0.000150884
		1042.5	0.000153392
		1044	0.000155869
		1045.5	0.00015832
		1047	0.000160726
		1048.5	0.000163091
		1050	0.000165412
		1051.5	0.000167686
		1053	0.00016991
		1054.5	0.00017208
		1056	0.000174194
		1057.5	0.000176249
		1059	0.000178242
		1060.5	0.000180169
		1062	0.000182028
		1063.5	0.000183816
		1065	0.000185531
		1066.5	0.00018717
		1068	0.000188729
		1069.5	0.000190208
		1071	0.000191603
		1072.5	0.000192913
		1074	0.000194135
		1075.5	0.000195267
		1077	0.000196307
		1078.5	0.000197255
		1080	0.000198107
		1081.5	0.000198864
		1083	0.000199523
		1084.5	0.000200083
		1086	0.000200544
		1087.5	0.000200905
		1089	0.000201164
		1090.5	0.000201322
		1092	0.000201379
		1093.5	0.000201333
		1095	0.000201185
		1096.5	0.000200936
		1098	0.000200585
		1099.5	0.000200134
		1101	0.000199582
		1102.5	0.000198931
		1104	0.000198181
		1105.5	0.000197334
		1107	0.000196392
		1108.5	0.000195355
		1110	0.000194225
		1111.5	0.000193004
		1113	0.000191695
		1114.5	0.000190298
		1116	0.000188817
		1117.5	0.000187253
		1119	0.00018561
		1120.5	0.000183889
		1122	0.000182093
		1123.5	0.000180226
		1125	0.00017829
		1126.5	0.000176288
		1128	0.000174224
		1129.5	0.000172099
		1131	0.000169919
		1132.5	0.000167686
		1134	0.000165403
		1135.5	0.000163074
		1137	0.000160702
		1138.5	0.000158292
		1140	0.000155846
		1141.5	0.000153368
		1143	0.000150862
		1144.5	0.000148332
		1146	0.00014578
		1147.5	0.000143211
		1149	0.000140628
		1150.5	0.000138036
		1152	0.000135436
		1153.5	0.000132834
		1155	0.000130232
		1156.5	0.000127634
		1158	0.000125043
		1159.5	0.000122471
		1161	0.000119907
		1162.5	0.000117359
		1164	0.000114832
		1165.5	0.000112329
		1167	0.000109852
		1168.5	0.000107405
		1170	0.000104991
		1171.5	0.000102611
		1173	0.000100269
		1174.5	9.79678e-05
		1176	9.57091e-05
		1177.5	9.34956e-05
		1179	9.13295e-05
		1180.5	8.92129e-05
		1182	8.71479e-05
		1183.5	8.51365e-05
		1185	8.31804e-05
		1186.5	8.12815e-05
		1188	7.94414e-05
		1189.5	7.76616e-05
		1191	7.59435e-05
		1192.5	7.42885e-05
		1194	7.26979e-05
		1195.5	7.11727e-05
		1197	6.97141e-05
		1198.5	6.83231e-05
		1200	6.70005e-05
		1201.5	6.57472e-05
		1203	6.45639e-05
		1204.5	6.34514e-05
		1206	6.24101e-05
		1207.5	6.14407e-05
		1209	6.05437e-05
		1210.5	5.97195e-05
		1212	5.89685e-05
		1213.5	5.82911e-05
		1215	5.76875e-05
		1216.5	5.71581e-05
		1218	5.67031e-05
		1219.5	5.63227e-05
		1221	5.60171e-05
		1222.5	5.57865e-05
		1224	5.5631e-05
		1225.5	5.55508e-05
		1227	5.55459e-05
		1228.5	5.56165e-05
		1230	5.57626e-05
		1231.5	5.59842e-05
		1233	5.62815e-05
		1234.5	5.66544e-05
		1236	5.7103e-05
		1237.5	5.7627e-05
		1239	5.82265e-05
		1240.5	5.89013e-05
		1242	5.96512e-05
		1243.5	6.04759e-05
		1245	6.13752e-05
		1246.5	6.23486e-05
		1248	6.33956e-05
		1249.5	6.45157e-05
		1251	6.5708e-05
		1252.5	6.69719e-05
		1254	6.83062e-05
		1255.5	6.97099e-05
		1257	7.11816e-05
		1258.5	7.27199e-05
		1260	7.4323e-05
		1261.5	7.59892e-05
		1263	7.77163e-05
		1264.5	7.95019e-05
		1266	8.13435e-05
		1267.5	8.32382e-05
		1269	8.51829e-05
		1270.5	8.71743e-05
		1272	8.92088e-05
		1273.5	9.12823e-05
		1275	9.33907e-05
		1276.5	9.55295e-05
		1278	9.76939e-05
		1279.5	9.98789e-05
		1281	0.000102079
		1282.5	0.000104289
		1284	0.000106503
		1285.5	0.000108714
		1287	0.000110917
		1288.5	0.000113105
		1290	0.000115272
		1291.5	0.00011741
		1293	0.000119512
		1294.5	0.000121573
		1296	0.000123583
		1297.5	0.000125538
		1299	0.000127428
		1300.5	0.000129248
		1302	0.00013099
		1303.5	0.000132648
		1305	0.000134215
		1306.5	0.000135684
		1308	0.000137049
		1309.5	0.000138304
		1311	0.000139444
		1312.5	0.000140462
		1314	0.000141356
		1315.5	0.000142119
		1317	0.000142747
		1318.5	0.000143231
		1320	0.000143582
		1321.5	0.000143789
		1323	0.000143852
		1324.5	0.000143767
		1326	0.000143536
		1327.5	0.000143156
		1329	0.000142629
		1330.5	0.000141956
		1332	0.000141137
		1333.5	0.000140168
		1335	0.000139068
		1336.5	0.00013783
		1338	0.000136459
		1339.5	0.00013496
		1341	0.000133336
		1342.5	0.000131593
		1344	0.000129736
		1345.5	0.000127772
		1347	0.000125707
		1348.5	0.000123547
		1350	0.0001213
		1351.5	0.000118972
		1353	0.00011657
		1354.5	0.000114103
		1356	0.000111578
		1357.5	0.000109001
		1359	0.000106382
		1360.5	0.000103727
		1362	0.000101043
		1363.5	9.83392e-05
		1365	9.56215e-05
		1366.5	9.28897e-05
		1368	9.01666e-05
		1369.5	8.74421e-05
		1371	8.47397e-05
		1372.5	8.20565e-05
		1374	7.93982e-05
		1375.5	7.67702e-05
		1377	7.41777e-05
		1378.5	7.16253e-05
		1380	6.91175e-05
		1381.5	6.66582e-05
		1383	6.4251e-05
		1384.5	6.18992e-05
		1386	5.96056e-05
		1387.5	5.73729e-05
		1389	5.5203e-05
		1390.5	5.30978e-05
		1392	5.10589e-05
		1393.5	4.90872e-05
		1395	4.71836e-05
		1396.5	4.53487e-05
		1398	4.35826e-05
		1399.5	4.18854e-05
		1401	4.02567e-05
		1402.5	3.86959e-05
		1404	3.72025e-05
		1405.5	3.57754e-05
		1407	3.44135e-05
		1408.5	3.31156e-05
		1410	3.18803e-05
		1411.5	3.0706e-05
		1413	2.95911e-05
		1414.5	2.85338e-05
		1416	2.75325e-05
		1417.5	2.65851e-05
		1419	2.56899e-05
		1420.5	2.48448e-05
		1422	2.4048e-05
		1423.5	2.32974e-05
		1425	2.25911e-05
		1426.5	2.19272e-05
		1428	2.13037e-05
		1429.5	2.07187e-05
		1431	2.01704e-05
		1432.5	1.96569e-05
		1434	1.91765e-05
		1435.5	1.87274e-05
		1437	1.83079e-05
		1438.5	1.79165e-05
		1440	1.75516e-05
		1441.5	1.72116e-05
		1443	1.68951e-05
		1444.5	1.66007e-05
		1446	1.63272e-05
		1447.5	1.60819e-05
		1449	1.58477e-05
		1450.5	1.5631e-05
		1452	1.54306e-05
		1453.5	1.52457e-05
		1455	1.50752e-05
		1456.5	1.49184e-05
		1458	1.47744e-05
		1459.5	1.46423e-05
		1461	1.45217e-05
		1462.5	1.44117e-05
		1464	1.43117e-05
		1465.5	1.42213e-05
		1467	1.414e-05
		1468.5	1.40672e-05
		1470	1.40025e-05
		1471.5	1.39457e-05
		1473	1.38963e-05
		1474.5	1.38541e-05
		1476	1.38189e-05
		1477.5	1.37905e-05
		1479	1.37686e-05
		1480.5	1.37533e-05
		1482	1.37445e-05
		1483.5	1.3742e-05
		1485	1.37461e-05
		1486.5	1.37566e-05
		1488	1.37737e-05
		1489.5	1.37976e-05
		1491	1.38284e-05
		1492.5	1.38665e-05
		1494	1.39119e-05
		1495.5	1.39652e-05
		1497	1.40191e-05
		1498.5	1.40903e-05
		1500	1.41703e-05
		1501.5	1.42598e-05
		1503	1.43593e-05
		1504.5	1.44695e-05
		1506	1.45909e-05
		1507.5	1.47244e-05
		1509	1.48707e-05
		1510.5	1.50307e-05
		1512	1.52052e-05
		1513.5	1.53951e-05
		1515	1.56015e-05
		1516.5	1.58252e-05
		1518	1.60674e-05
		1519.5	1.63291e-05
		1521	1.66115e-05
		1522.5	1.69158e-05
		1524	1.72431e-05
		1525.5	1.75946e-05
		1527	1.79717e-05
		1528.5	1.83755e-05
		1530	1.88074e-05
		1531.5	1.92686e-05
		1533	1.97604e-05
		1534.5	2.02841e-05
		1536	2.08409e-05
		1537.5	2.14321e-05
		1539	2.20589e-05
		1540.5	2.27224e-05
		1542	2.34237e-05
		1543.5	2.41639e-05
		1545	2.4944e-05
		1546.5	2.57649e-05
		1548	2.66272e-05
		1549.5	2.75319e-05
		1551	2.84793e-05
		1552.5	2.947e-05
		1554	3.05043e-05
		1555.5	3.15823e-05
		1557	3.27041e-05
		1558.5	3.38694e-05
		1560	3.50704e-05
		1561.5	3.63223e-05
		1563	3.76162e-05
		1564.5	3.8951e-05
		1566	4.03255e-05
		1567.5	4.17385e-05
		1569	4.31883e-05
		1570.5	4.46731e-05
		1572	4.61909e-05
		1573.5	4.77393e-05
		1575	4.93159e-05
		1576.5	5.09179e-05
		1578	5.25424e-05
		1579.5	5.41862e-05
		1581	5.58458e-05
		1582.5	5.75177e-05
		1584	5.91981e-05
		1585.5	6.08829e-05
		1587	6.25682e-05
		1588.5	6.42494e-05
		1590	6.59223e-05
		1591.5	6.75823e-05
		1593	6.92246e-05
		1594.5	7.08446e-05
		1596	7.24375e-05
		1597.5	7.39983e-05
		1599	7.55224e-05
		1600.5	7.70048e-05
		1602	7.84408e-05
		1603.5	7.98256e-05
		1605	8.11547e-05
		1606.5	8.24233e-05
		1608	8.36273e-05
		1609.5	8.47623e-05
		1611	8.58244e-05
		1612.5	8.68096e-05
		1614	8.77145e-05
		1615.5	8.85357e-05
		1617	8.92701e-05
		1618.5	8.9915e-05
		1620	9.04679e-05
		1621.5	9.09267e-05
		1623	9.12985e-05
		1624.5	9.15653e-05
		1626	9.17338e-05
		1627.5	9.18035e-05
		1629	9.17739e-05
		1630.5	9.16451e-05
		1632	9.14176e-05
		1633.5	9.10922e-05
		1635	9.067e-05
		1636.5	9.01526e-05
		1638	8.95418e-05
		1639.5	8.884e-05
		1641	8.80496e-05
		1642.5	8.71735e-05
		1644	8.62149e-05
		1645.5	8.51772e-05
		1647	8.4064e-05
		1648.5	8.28794e-05
		1650	8.16274e-05
		1651.5	8.03124e-05
		1653	7.89389e-05
		1654.5	7.75114e-05
		1656	7.60348e-05
		1657.5	7.45137e-05
		1659	7.29532e-05
		1660.5	7.13582e-05
		1662	6.97336e-05
		1663.5	6.80842e-05
		1665	6.64152e-05
		1666.5	6.47312e-05
		1668	6.3037e-05
		1669.5	6.13374e-05
		1671	5.96368e-05
		1672.5	5.79397e-05
		1674	5.62504e-05
		1675.5	5.4573e-05
		1677	5.29114e-05
		1678.5	5.12693e-05
		1680	4.96505e-05
		1681.5	4.80581e-05
		1683	4.64953e-05
		1684.5	4.49651e-05
		1686	4.34703e-05
		1687.5	4.20131e-05
		1689	4.05961e-05
		1690.5	3.92212e-05
		1692	3.78903e-05
		1693.5	3.6605e-05
		1695	3.53667e-05
		1696.5	3.41768e-05
		1698	3.30362e-05
		1699.5	3.19458e-05
		1701	3.09064e-05
		1702.5	2.99267e-05
		1704	2.89921e-05
		1705.5	2.81098e-05
		1707	2.72799e-05
		1708.5	2.65025e-05
		1710	2.57775e-05
		1711.5	2.51047e-05
		1713	2.44838e-05
		1714.5	2.39145e-05
		1716	2.33964e-05
		1717.5	2.29291e-05
		1719	2.2512e-05
		1720.5	2.21447e-05
		1722	2.18266e-05
		1723.5	2.15571e-05
		1725	2.13358e-05
		1726.5	2.11715e-05
		1728	2.10464e-05
		1729.5	2.09682e-05
		1731	2.09364e-05
		1732.5	2.09506e-05
		1734	2.10104e-05
		1735.5	2.11157e-05
		1737	2.12662e-05
		1738.5	2.14617e-05
		1740	2.17022e-05
		1741.5	2.19877e-05
		1743	2.23182e-05
		1744.5	2.26939e-05
		1746	2.31151e-05
		1747.5	2.35821e-05
		1749	2.40954e-05
		1750.5	2.46554e-05
		1752	2.52629e-05
		1753.5	2.59184e-05
		1755	2.66229e-05
		1756.5	2.73772e-05
		1758	2.81823e-05
		1759.5	2.90394e-05
		1761	2.99497e-05
		1762.5	3.09143e-05
		1764	3.19347e-05
		1765.5	3.30123e-05
		1767	3.41486e-05
		1768.5	3.53452e-05
		1770	3.66037e-05
		1771.5	3.79259e-05
		1773	3.93134e-05
		1774.5	4.0768e-05
		1776	4.22916e-05
		1777.5	4.38859e-05
		1779	4.55526e-05
		1780.5	4.72936e-05
		1782	4.91105e-05
		1783.5	5.10051e-05
		1785	5.29789e-05
		1786.5	5.50333e-05
		1788	5.71698e-05
		1789.5	5.93896e-05
		1791	6.16938e-05
		1792.5	6.40831e-05
		1794	6.65584e-05
		1795.5	6.912e-05
		1797	7.17681e-05
		1798.5	7.45026e-05
		1800	7.7323e-05
		1801.5	8.02287e-05
		1803	8.32185e-05
		1804.5	8.6291e-05
		1806	8.94443e-05
		1807.5	9.26761e-05
		1809	9.59754e-05
		1810.5	9.93568e-05
		1812	0.000102807
		1813.5	0.000106322
		1815	0.000109898
		1816.5	0.000113528
		1818	0.000117209
		1819.5	0.000120933
		1821	0.000124695
		1822.5	0.000128487
		1824	0.000132303
		1825.5	0.000136134
		1827	0.000139973
		1828.5	0.00014381
		1830	0.000147638
		1831.5	0.000151446
		1833	0.000155226
		1834.5	0.000158968
		1836	0.000162662
		1837.5	0.000166298
		1839	0.000169866
		1840.5	0.000173356
		1842	0.000176758
		1843.5	0.000180062
		1845	0.000183258
		1846.5	0.000186337
		1848	0.000189288
		1849.5	0.000192103
		1851	0.000194773
		1852.5	0.000197289
		1854	0.000199643
		1855.5	0.000201828
		1857	0.000203837
		1858.5	0.000205663
		1860	0.000207299
		1861.5	0.000208742
		1863	0.000209986
		1864.5	0.000211027
		1866	0.000211862
		1867.5	0.000212488
		1869	0.000212903
		1870.5	0.000213107
		1872	0.000213098
		1873.5	0.000212877
		1875	0.000212446
		1876.5	0.000211805
		1878	0.000210957
		1879.5	0.000209905
		1881	0.000208652
		1882.5	0.000207203
		1884	0.000205563
		1885.5	0.000203736
		1887	0.00020173
		1888.5	0.000199549
		1890	0.000197201
		1891.5	0.000194692
		1893	0.000192031
		1894.5	0.000189225
		1896	0.000186282
		1897.5	0.000183211
		1899	0.00018002
		1900.5	0.000176716
		1902	0.000173311
		1903.5	0.000169811
		1905	0.000166226
		1906.5	0.000162565
		1908	0.000158836
		1909.5	0.000155048
		1911	0.000151211
		1912.5	0.000147332
		1914	0.00014342
		1915.5	0.000139483
		1917	0.000135529
		1918.5	0.000131566
		1920	0.000127602
		1921.5	0.000123644
		1923	0.000119699
		1924.5	0.000115773
		1926	0.000111874
		1927.5	0.000108008
		1929	0.00010418
		1930.5	0.000100396
		1932	9.66615e-05
		1933.5	9.29813e-05
		1935	8.936e-05
		1936.5	8.5802e-05
		1938	8.23111e-05
		1939.5	7.8891e-05
		1941	7.5545e-05
		1942.5	7.22761e-05
		1944	6.90868e-05
		1945.5	6.59796e-05
		1947	6.29563e-05
		1948.5	6.00188e-05
		1950	5.71685e-05
		1951.5	5.44063e-05
		1953	5.17332e-05
		1954.5	4.91497e-05
		1956	4.66561e-05
		1957.5	4.42524e-05
		1959	4.19384e-05
		1960.5	3.97136e-05
		1962	3.75774e-05
		1963.5	3.5529e-05
		1965	3.35671e-05
		1966.5	3.16907e-05
		1968	2.98982e-05
		1969.5	2.81882e-05
		1971	2.65588e-05
		1972.5	2.50084e-05
		1974	2.35348e-05
		1975.5	2.21361e-05
		1977	2.08102e-05
		1978.5	1.95548e-05
		1980	1.83676e-05
		1981.5	1.72463e-05
		1983	1.61886e-05
		1984.5	1.51921e-05
		1986	1.42543e-05
		1987.5	1.33729e-05
		1989	1.25454e-05
		1990.5	1.17695e-05
		1992	1.10428e-05
		1993.5	1.03628e-05
		1995	9.7274e-06
		1996.5	9.13423e-06
		1998	8.58108e-06
		1999.5	8.06578e-06
		2001	7.58624e-06
		2002.5	7.1404e-06
		2004	6.72628e-06
		2005.5	6.34198e-06
		2007	5.98564e-06
		2008.5	5.6555e-06
		2010	5.34985e-06
		2011.5	5.06709e-06
		2013	4.80566e-06
		2014.5	4.56409e-06
		2016	4.34097e-06
		2017.5	4.13499e-06
		2019	3.94488e-06
		2020.5	3.76946e-06
		2022	3.59962e-06
		2023.5	3.4516e-06
		2025	3.31492e-06
		2026.5	3.18869e-06
		2028	3.07208e-06
		2029.5	2.9643e-06
		2031	2.86464e-06
		2032.5	2.7724e-06
		2034	2.68695e-06
		2035.5	2.60772e-06
		2037	2.53416e-06
		2038.5	2.46578e-06
		2040	2.4021e-06
		2041.5	2.34271e-06
		2043	2.28721e-06
		2044.5	2.23526e-06
		2046	2.18651e-06
		2047.5	2.14068e-06
		2049	2.09749e-06
		2050.5	2.0567e-06
		2052	2.01806e-06
		2053.5	1.98139e-06
		2055	1.94649e-06
		2056.5	1.9132e-06
		2058	1.88136e-06
		2059.5	1.85084e-06
		2061	1.82152e-06
		2062.5	1.79327e-06
		2064	1.76601e-06
		2065.5	1.73964e-06
		2067	1.71409e-06
		2068.5	1.68927e-06
		2070	1.66514e-06
		2071.5	1.63367e-06
		2073	1.61162e-06
		2074.5	1.58999e-06
		2076	1.56153e-06
		2077.5	1.54173e-06
		2079	1.52214e-06
		2080.5	1.50273e-06
		2082	1.48352e-06
		2083.5	1.46449e-06
		2085	1.44566e-06
		2086.5	1.42701e-06
		2088	1.40855e-06
		2089.5	1.39028e-06
		2091	1.3722e-06
		2092.5	1.3543e-06
		2094	1.33658e-06
		2095.5	1.31904e-06
		2097	1.30169e-06
		2098.5	1.28451e-06
		2100	1.26752e-06
		2101.5	1.2507e-06
		2103	1.23406e-06
		2104.5	1.2176e-06
		2106	1.20131e-06
		2107.5	1.18519e-06
		2109	1.16925e-06
		2110.5	1.15347e-06
		2112	1.13787e-06
		2113.5	1.12244e-06
		2115	1.10717e-06
		2116.5	1.09207e-06
		2118	1.07714e-06
		2119.5	1.06237e-06
		2121	1.04776e-06
		2122.5	1.03332e-06
		2124	1.01904e-06
		2125.5	1.00491e-06
		2127	9.90946e-07
		2128.5	9.77139e-07
		2130	9.63487e-07
		2131.5	9.49991e-07
		2133	9.36649e-07
		2134.5	9.23459e-07
		2136	9.10421e-07
		2137.5	8.97533e-07
		2139	8.84795e-07
		2140.5	8.72205e-07
		2142	8.59761e-07
		2143.5	8.47464e-07
		2145	8.35311e-07
		2146.5	8.23301e-07
		2148	8.11433e-07
		2149.5	7.99707e-07
		2151	7.8812e-07
		2152.5	7.76673e-07
		2154	7.65362e-07
		2155.5	7.54189e-07
		2157	7.4315e-07
		2158.5	7.32246e-07
		2160	7.21474e-07
		2161.5	7.10834e-07
		2163	7.00325e-07
		2164.5	6.89946e-07
		2166	6.79694e-07
		2167.5	6.6957e-07
		2169	6.59572e-07
		2170.5	6.49699e-07
		2172	6.3995e-07
		2173.5	6.30323e-07
		2175	6.20818e-07
		2176.5	6.11433e-07
		2178	6.02168e-07
		2179.5	5.93021e-07
		2181	5.8399e-07
		2182.5	5.75076e-07
		2184	5.66276e-07
		2185.5	5.57591e-07
		2187	5.49018e-07
		2188.5	5.40556e-07
		2190	5.32205e-07
		2191.5	5.23963e-07
		2193	5.1583e-07
		2194.5	5.07803e-07
		2196	4.99883e-07
		2197.5	4.92068e-07
		2199	4.84357e-07
		2200.5	4.76749e-07
		2202	4.69243e-07
		2203.5	4.61837e-07
		2205	4.54532e-07
		2206.5	4.47325e-07
		2208	4.40216e-07
		2209.5	4.33204e-07
		2211	4.26287e-07
		2212.5	4.19465e-07
		2214	4.12737e-07
		2215.5	4.06101e-07
		2217	3.99558e-07
		2218.5	3.93104e-07
		2220	3.86741e-07
		2221.5	3.80466e-07
		2223	3.74279e-07
		2224.5	3.68179e-07
		2226	3.62165e-07
		2227.5	3.56236e-07
		2229	3.5039e-07
		2230.5	3.44628e-07
		2232	3.38947e-07
		2233.5	3.33348e-07
		2235	3.27829e-07
		2236.5	3.22389e-07
		2238	3.17028e-07
		2239.5	3.11744e-07
		2241	3.06536e-07
		2242.5	3.01405e-07
		2244	2.96348e-07
		2245.5	2.91365e-07
		2247	2.86455e-07
		2248.5	2.81617e-07
		2250	2.7685e-07
		2251.5	2.72154e-07
		2253	2.67528e-07
		2254.5	2.6297e-07
		2256	2.58481e-07
		2257.5	2.54058e-07
		2259	2.49702e-07
		2260.5	2.45411e-07
		2262	2.41185e-07
		2263.5	2.37023e-07
		2265	2.32924e-07
		2266.5	2.28887e-07
		2268	2.24912e-07
		2269.5	2.20997e-07
		2271	2.17143e-07
		2272.5	2.13347e-07
		2274	2.0961e-07
		2275.5	2.05931e-07
		2277	2.02309e-07
		2278.5	1.98743e-07
		2280	1.95233e-07
		2281.5	1.91777e-07
		2283	1.88376e-07
		2284.5	1.85028e-07
		2286	1.81733e-07
		2287.5	1.78489e-07
		2289	1.75297e-07
		2290.5	1.72156e-07
		2292	1.69064e-07
		2293.5	1.66022e-07
		2295	1.63029e-07
		2296.5	1.60083e-07
		2298	1.57185e-07
		2299.5	1.54333e-07
		2301	1.51528e-07
		2302.5	1.48767e-07
		2304	1.46052e-07
		2305.5	1.43381e-07
		2307	1.40753e-07
		2308.5	1.38169e-07
		2310	1.35627e-07
		2311.5	1.33126e-07
		2313	1.30667e-07
		2314.5	1.28248e-07
		2316	1.2587e-07
		2317.5	1.23531e-07
		2319	1.2123e-07
		2320.5	1.18969e-07
		2322	1.16745e-07
		2323.5	1.14558e-07
		2325	1.12408e-07
		2326.5	1.10294e-07
		2328	1.08216e-07
		2329.5	1.06173e-07
		2331	1.04165e-07
		2332.5	1.02191e-07
		2334	1.0025e-07
		2335.5	9.83431e-08
		2337	9.64685e-08
		2338.5	9.46261e-08
		2340	9.28154e-08
		2341.5	9.10359e-08
		2343	8.92871e-08
		2344.5	8.75687e-08
		2346	8.58802e-08
		2347.5	8.4221e-08
		2349	8.25908e-08
		2350.5	8.09891e-08
		2352	7.94155e-08
		2353.5	7.78695e-08
		2355	7.63508e-08
		2356.5	7.48589e-08
		2358	7.33934e-08
		2359.5	7.19538e-08
		2361	7.05399e-08
		2362.5	6.91512e-08
		2364	6.77872e-08
		2365.5	6.64477e-08
		2367	6.51322e-08
		2368.5	6.38403e-08
		2370	6.25717e-08
		2371.5	6.13261e-08
		2373	6.01029e-08
		2374.5	5.8902e-08
		2376	5.77229e-08
		2377.5	5.65652e-08
		2379	5.54287e-08
		2380.5	5.4313e-08
		2382	5.32178e-08
		2383.5	5.21427e-08
		2385	5.10874e-08
		2386.5	5.00516e-08
		2388	4.90349e-08
		2389.5	4.80371e-08
		2391	4.70578e-08
		2392.5	4.60968e-08
		2394	4.51536e-08
		2395.5	4.42282e-08
		2397	4.332e-08
		2398.5	4.2429e-08
		2400	4.15547e-08
		2401.5	4.06969e-08
		2403	3.98553e-08
		2404.5	3.90296e-08
		2406	3.82196e-08
		2407.5	3.7425e-08
		2409	3.66456e-08
		2410.5	3.5881e-08
		2412	3.51311e-08
		2413.5	3.43956e-08
		2415	3.36742e-08
		2416.5	3.29667e-08
		2418	3.22728e-08
		2419.5	3.15924e-08
		2421	3.09251e-08
		2422.5	3.02708e-08
		2424	2.96293e-08
		2425.5	2.90002e-08
		2427	2.83835e-08
		2428.5	2.77788e-08
		2430	2.7186e-08
		2431.5	2.66048e-08
		2433	2.60351e-08
		2434.5	2.54766e-08
		2436	2.49292e-08
		2437.5	2.43926e-08
		2439	2.38667e-08
		2440.5	2.33512e-08
		2442	2.2846e-08
		2443.5	2.23509e-08
		2445	2.18657e-08
		2446.5	2.13903e-08
		2448	2.09244e-08
		2449.5	2.04678e-08
		2451	2.00205e-08
		2452.5	1.95822e-08
		2454	1.91528e-08
		2455.5	1.87321e-08
		2457	1.832e-08
		2458.5	1.79163e-08
		2460	1.75208e-08
		2461.5	1.71334e-08
		2463	1.67539e-08
		2464.5	1.63822e-08
		2466	1.60182e-08
		2467.5	1.56616e-08
		2469	1.53125e-08
		2470.5	1.49705e-08
		2472	1.46357e-08
		2473.5	1.43077e-08
		2475	1.39867e-08
		2476.5	1.36723e-08
		2478	1.33644e-08
		2479.5	1.3063e-08
		2481	1.2768e-08
		2482.5	1.24791e-08
		2484	1.21963e-08
		2485.5	1.19195e-08
		2487	1.16485e-08
		2488.5	1.13832e-08
		2490	1.11236e-08
		2491.5	1.08695e-08
		2493	1.06208e-08
		2494.5	1.03774e-08
		2496	1.01392e-08
		2497.5	9.90604e-09
		2499	9.67792e-09
		2500.5	9.4547e-09
		2502	9.23629e-09
		2503.5	9.02258e-09
		2505	1.80293e-08
		2506.5	1.93837e-08
		2508	2.09892e-08
		2509.5	1.46688e-08
		2511	1.70806e-08
		2512.5	1.98621e-08
		2514	2.30652e-08
		2515.5	2.67486e-08
		2517	3.09782e-08
		2518.5	3.58279e-08
		2520	4.13808e-08
		2521.5	4.77296e-08
		2523	5.49779e-08
		2524.5	6.32412e-08
		2526	7.26478e-08
		2527.5	8.33406e-08
		2529	9.54778e-08
		2530.5	1.19633e-07
		2532	1.38323e-07
		2533.5	1.59911e-07
		2535	1.84856e-07
		2536.5	2.23162e-07
		2538	2.58224e-07
		2539.5	2.98807e-07
		2541	3.45795e-07
		2542.5	4.00211e-07
		2544	4.63241e-07
		2545.5	5.36256e-07
		2547	6.20837e-07
		2548.5	7.18804e-07
		2550	8.32252e-07
		2551.5	9.63575e-07
		2553	1.11551e-06
		2554.5	1.29118e-06
		2556	1.49411e-06
		2557.5	1.7283e-06
		2559	1.99826e-06
		2560.5	2.30902e-06
		2562	2.66622e-06
		2563.5	3.0761e-06
		2565	3.54559e-06
		2566.5	4.08227e-06
		2568	4.69445e-06
		2569.5	5.39118e-06
		2571	6.18219e-06
		2572.5	7.07796e-06
		2574	8.08964e-06
		2575.5	9.22904e-06
		2577	1.05085e-05
		2578.5	1.1941e-05
		2580	1.35397e-05
		2581.5	1.53182e-05
		2583	1.72901e-05
		2584.5	1.94691e-05
		2586	2.18683e-05
		2587.5	2.45007e-05
		2589	2.73783e-05
		2590.5	3.05121e-05
		2592	3.3912e-05
		2593.5	3.75861e-05
		2595	4.15409e-05
		2596.5	4.57805e-05
		2598	5.03066e-05
		2599.5	5.51184e-05
		2601	6.0212e-05
		2602.5	6.55804e-05
		2604	7.12134e-05
		2605.5	7.7097e-05
		2607	8.32141e-05
		2608.5	8.95439e-05
		2610	9.60621e-05
		2611.5	0.000102741
		2613	0.00010955
		2614.5	0.000116456
		2616	0.000123422
		2617.5	0.000130411
		2619	0.000137381
		2620.5	0.000144293
		2622	0.000151104
		2623.5	0.000157772
		2625	0.000164257
		2626.5	0.000170518
		2628	0.000176518
		2629.5	0.00018222
		2631	0.000187592
		2632.5	0.000192605
		2634	0.000197233
		2635.5	0.000201456
		2637	0.000205258
		2638.5	0.000208626
		2640	0.000211554
		2641.5	0.000214042
		2643	0.000216091
		2644.5	0.000217711
		2646	0.000218913
		2647.5	0.000219715
		2649	0.000220137
		2650.5	0.000220202
		2652	0.000219936
		2653.5	0.000219369
		2655	0.000218529
		2656.5	0.000217448
		2658	0.000216157
		2659.5	0.000214686
		2661	0.000213066
		2662.5	0.000211325
		2664	0.000209491
		2665.5	0.000207588
		2667	0.00020564
		2668.5	0.000203665
		2670	0.000201682
		2671.5	0.000199703
		2673	0.00019774
		2674.5	0.000195802
		2676	0.000193892
		2677.5	0.000192014
		2679	0.000190168
		2680.5	0.00018835
		2682	0.000186557
		2683.5	0.000184782
		2685	0.000183017
		2686.5	0.000181254
		2688	0.000179482
		2689.5	0.000177692
		2691	0.000175873
		2692.5	0.000174013
		2694	0.000172104
		2695.5	0.000170135
		2697	0.000168096
		2698.5	0.00016598
		2700	0.000163779
		2701.5	0.000161487
		2703	0.000159099
		2704.5	0.000156612
		2706	0.000154022
		2707.5	0.000151328
		2709	0.000148531
		2710.5	0.000145632
		2712	0.000142632
		2713.5	0.000139537
		2715	0.000136349
		2716.5	0.000133075
		2718	0.000129721
		2719.5	0.000126294
		2721	0.000122801
		2722.5	0.000119252
		2724	0.000115653
		2725.5	0.000112015
		2727	0.000108347
		2728.5	0.000104657
		2730	0.000100956
		2731.5	9.72521e-05
		2733	9.35553e-05
		2734.5	8.98744e-05
		2736	8.6218e-05
		2737.5	8.25948e-05
		2739	7.90127e-05
		2740.5	7.54794e-05
		2742	7.20022e-05
		2743.5	6.85879e-05
		2745	6.52425e-05
		2746.5	6.19719e-05
		2748	5.87747e-05
		2749.5	5.567e-05
		2751	5.26536e-05
		2752.5	4.97289e-05
		2754	4.68989e-05
		2755.5	4.41662e-05
		2757	4.15327e-05
		2758.5	3.89997e-05
		2760	3.65682e-05
		2761.5	3.42386e-05
		2763	3.20108e-05
		2764.5	2.98846e-05
		2766	2.78591e-05
		2767.5	2.5933e-05
		2769	2.4105e-05
		2770.5	2.23731e-05
		2772	2.07354e-05
		2773.5	1.91895e-05
		2775	1.77329e-05
		2776.5	1.63629e-05
		2778	1.50766e-05
		2779.5	1.38711e-05
		2781	1.27433e-05
		2782.5	1.169e-05
		2784	1.0708e-05
		2785.5	9.79405e-06
		2787	8.94496e-06
		2788.5	8.15746e-06
		2790	7.42833e-06
		2791.5	6.75441e-06
		2793	6.13257e-06
		2794.5	5.55977e-06
		2796	5.03303e-06
		2797.5	4.54946e-06
		2799	4.10627e-06
		2800.5	3.70078e-06
		2802	3.3304e-06
		2803.5	2.99264e-06
		2805	2.68516e-06
		2806.5	2.4057e-06
		2808	2.15213e-06
		2809.5	1.92244e-06
		2811	1.71471e-06
		2812.5	1.52715e-06
		2814	1.3581e-06
		2815.5	1.20596e-06
		2817	1.06927e-06
		2818.5	9.4667e-07
		2820	8.36878e-07
		2821.5	7.38719e-07
		2823	6.51103e-07
		2824.5	5.73025e-07
		2826	5.03559e-07
		2827.5	4.41854e-07
		2829	3.87134e-07
		2830.5	3.38684e-07
		2832	2.95857e-07
		2833.5	2.58059e-07
		2835	2.24755e-07
		2836.5	1.95458e-07
		2838	1.69725e-07
		2839.5	1.47161e-07
		2841	1.27406e-07
		2842.5	1.10138e-07
		2844	9.50685e-08
		2845.5	8.19384e-08
		2847	7.05163e-08
		2848.5	6.05958e-08
		2850	5.19932e-08
		2851.5	4.45452e-08
		2853	3.81072e-08
		2854.5	2.51552e-08
		2856	2.14581e-08
		2857.5	1.82763e-08
		2859	1.55424e-08
		2860.5	1.31972e-08
		2862	1.11886e-08
		2863.5	9.47122e-09
		2865	0
		2866.5	0
		2868	0
		2869.5	0
		2871	0
		2872.5	0
		2874	0
		2875.5	0
		2877	0
		2878.5	0
		2880	0
		2881.5	0
		2883	0
		2884.5	0
		2886	0
		2887.5	0
		2889	0
		2890.5	0
		2892	0
		2893.5	0
		2895	0
		2896.5	0
		2898	0
		2899.5	0
		2901	0
		2902.5	0
		2904	0
		2905.5	0
		2907	0
		2908.5	0
		2910	0
		2911.5	0
		2913	0
		2914.5	0
		2916	0
		2917.5	0
		2919	0
		2920.5	0
		2922	0
		2923.5	0
		2925	0
		2926.5	0
		2928	0
		2929.5	0
		2931	0
		2932.5	0
		2934	0
		2935.5	0
		2937	0
		2938.5	0
		2940	0
		2941.5	0
		2943	0
		2944.5	0
		2946	0
		2947.5	0
		2949	0
		2950.5	0
		2952	0
		2953.5	0
		2955	0
		2956.5	0
		2958	0
		2959.5	0
		2961	0
		2962.5	0
		2964	0
		2965.5	0
		2967	0
		2968.5	0
		2970	0
		2971.5	0
		2973	0
		2974.5	0
		2976	0
		2977.5	0
		2979	0
		2980.5	0
		2982	0
		2983.5	0
		2985	0
		2986.5	0
		2988	0
		2989.5	0
		2991	0
		2992.5	0
		2994	0
		2995.5	0
		2997	0
		2998.5	0
[truncated: 1 more rows]

## Sheet: PlotDat26
Source sheet	Sheet2	0	0	400	0	0	0
Plot name	ProbDens10	1.5	0	480	0	2998.5	0
Plot Type	16	3	0	480	54
1st free col	9	4.5	0	400	54
Sigma Level	1	6	0	400	0
Absolute Errs	TRUE	7.5	0	ErrBox	ErrBox
Symbol Type	1	9	0	480	0
Inverse Plot	FALSE	10.5	0	560	0
Color Plot	TRUE	12	0	560	36
3D plot	FALSE	13.5	0	480	36
Linear	FALSE	15	0	480	0
Data Range	S4:T123	16.5	0	ErrBox	ErrBox
Filled Symbols	FALSE	18	0	560	0
ConcAge	FALSE	19.5	0	640	0
ConcSwap	FALSE	21	0	640	7
1st Symbol-row	1	22.5	0	560	7
		24	0	560	0
		25.5	0	ErrBox	ErrBox
		27	0	640	0
		28.5	0	720	0
		30	0	720	4
		31.5	0	640	4
		33	0	640	0
		34.5	0	ErrBox	ErrBox
		36	0	720	0
		37.5	0	800	0
		39	0	800	3
		40.5	0	720	3
		42	0	720	0
		43.5	0	ErrBox	ErrBox
		45	0	800	0
		46.5	0	880	0
		48	0	880	1
		49.5	0	800	1
		51	0	800	0
		52.5	0	ErrBox	ErrBox
		54	0	960	0
		55.5	0	1040	0
		57	0	1040	1
		58.5	0	960	1
		60	0	960	0
		61.5	0	ErrBox	ErrBox
		63	0	1040	0
		64.5	0	1120	0
		66	0	1120	3
		67.5	0	1040	3
		69	0	1040	0
		70.5	0	ErrBox	ErrBox
		72	0	1120	0
		73.5	0	1200	0
		75	0	1200	1
		76.5	0	1120	1
		78	0	1120	0
		79.5	0	ErrBox	ErrBox
		81	0	1280	0
		82.5	0	1360	0
		84	0	1360	2
		85.5	0	1280	2
		87	0	1280	0
		88.5	0	ErrBox	ErrBox
		90	0	1520	0
		91.5	0	1600	0
		93	0	1600	1
		94.5	0	1520	1
		96	0	1520	0
		97.5	0	ErrBox	ErrBox
		99	0	1600	0
		100.5	0	1680	0
		102	0	1680	1
		103.5	0	1600	1
		105	0	1600	0
		106.5	0	ErrBox	ErrBox
		108	0	1840	0
		109.5	0	1920	0
		111	0	1920	3
		112.5	0	1840	3
		114	0	1840	0
		115.5	0	ErrBox	ErrBox
		117	0	2560	0
		118.5	0	2640	0
		120	0	2640	1
		121.5	0	2560	1
		123	0	2560	0
		124.5	0	ErrBox	ErrBox
		126	0	2640	0
		127.5	0	2720	0
		129	0	2720	2
		130.5	0	2640	2
		132	0	2640	0
		133.5	0	ErrBox	ErrBox
		135	0
		136.5	0
		138	0
		139.5	0
		141	0
		142.5	0
		144	0
		145.5	0
		147	0
		148.5	0
		150	0
		151.5	0
		153	0
		154.5	0
		156	0
		157.5	0
		159	0
		160.5	0
		162	0
		163.5	0
		165	0
		166.5	0
		168	0
		169.5	0
		171	0
		172.5	0
		174	0
		175.5	0
		177	0
		178.5	0
		180	0
		181.5	0
		183	0
		184.5	0
		186	0
		187.5	0
		189	0
		190.5	0
		192	0
		193.5	0
		195	0
		196.5	0
		198	0
		199.5	0
		201	0
		202.5	0
		204	0
		205.5	0
		207	0
		208.5	0
		210	8.42784e-09
		211.5	9.37283e-09
		213	1.04171e-08
		214.5	1.15701e-08
		216	1.28426e-08
		217.5	1.42458e-08
		219	1.57921e-08
		220.5	1.74949e-08
		222	1.93689e-08
		223.5	2.14298e-08
		225	2.36947e-08
		226.5	2.61821e-08
		228	2.89119e-08
		229.5	3.19057e-08
		231	3.51869e-08
		232.5	3.87804e-08
		234	4.27134e-08
		235.5	4.70149e-08
		237	5.17162e-08
		238.5	5.6851e-08
		240	6.24553e-08
		241.5	6.85677e-08
		243	7.52299e-08
		244.5	8.24861e-08
		246	9.03839e-08
		247.5	9.89741e-08
		249	1.08311e-07
		250.5	1.18452e-07
		252	1.29459e-07
		253.5	1.41397e-07
		255	1.54337e-07
		256.5	1.68352e-07
		258	1.83522e-07
		259.5	1.99929e-07
		261	2.17663e-07
		262.5	2.36817e-07
		264	2.57491e-07
		265.5	2.79788e-07
		267	3.03821e-07
		268.5	3.29705e-07
		270	3.57563e-07
		271.5	3.87526e-07
		273	4.19728e-07
		274.5	4.54313e-07
		276	4.9143e-07
		277.5	5.31237e-07
		279	5.73898e-07
		280.5	6.19586e-07
		282	6.68479e-07
		283.5	7.20765e-07
		285	7.76639e-07
		286.5	8.36306e-07
		288	8.99975e-07
		289.5	9.67868e-07
		291	1.04021e-06
		292.5	1.11724e-06
		294	1.1992e-06
		295.5	1.28634e-06
		297	1.37892e-06
		298.5	1.47722e-06
		300	1.5815e-06
		301.5	1.69205e-06
		303	1.80916e-06
		304.5	1.93313e-06
		306	2.06426e-06
		307.5	2.20286e-06
		309	2.34925e-06
		310.5	2.50376e-06
		312	2.66671e-06
		313.5	2.83843e-06
		315	3.01926e-06
		316.5	3.20954e-06
		318	3.40961e-06
		319.5	3.61982e-06
		321	3.84051e-06
		322.5	4.07202e-06
		324	4.31471e-06
		325.5	4.56891e-06
		327	4.83497e-06
		328.5	5.11323e-06
		330	5.404e-06
		331.5	5.70764e-06
		333	6.02444e-06
		334.5	6.35473e-06
		336	6.6988e-06
		337.5	7.05694e-06
		339	7.42945e-06
		340.5	7.81656e-06
		342	8.21855e-06
		343.5	8.63564e-06
		345	9.06804e-06
		346.5	9.51595e-06
		348	9.97955e-06
		349.5	1.0459e-05
		351	1.09544e-05
		352.5	1.14658e-05
		354	1.19934e-05
		355.5	1.25372e-05
		357	1.30972e-05
		358.5	1.36734e-05
		360	1.42657e-05
		361.5	1.48741e-05
		363	1.54985e-05
		364.5	1.61386e-05
		366	1.67943e-05
		367.5	1.74654e-05
		369	1.81516e-05
		370.5	1.88526e-05
		372	1.9568e-05
		373.5	2.02975e-05
		375	2.10406e-05
		376.5	2.17968e-05
		378	2.25657e-05
		379.5	2.33466e-05
		381	2.4139e-05
		382.5	2.49421e-05
		384	2.57554e-05
		385.5	2.6578e-05
		387	2.74092e-05
		388.5	2.82482e-05
		390	2.90941e-05
		391.5	2.9946e-05
		393	3.08029e-05
		394.5	3.16729e-05
		396	3.25399e-05
		397.5	3.34194e-05
		399	3.42966e-05
		400.5	3.51944e-05
		402	3.61418e-05
		403.5	3.72823e-05
		405	3.91015e-05
		406.5	4.28409e-05
		408	5.15264e-05
		409.5	7.11538e-05
		411	0.000111474
		412.5	0.000184688
		414	0.000300546
		415.5	0.000458426
		417	0.000641094
		418.5	0.000816842
		420	0.000953259
		421.5	0.00103714
		423	0.00108716
		424.5	0.00114758
		426	0.00126277
		427.5	0.0014458
		429	0.00166329
		430.5	0.00185219
		432	0.00196332
		433.5	0.00200118
		435	0.00202822
		436.5	0.00212879
		438	0.00236095
		439.5	0.00272916
		441	0.00319011
		442.5	0.00367916
		444	0.00413885
		445.5	0.00453716
		447	0.0048714
		448.5	0.00515888
		450	0.00542119
		451.5	0.00567355
		453	0.00592832
		454.5	0.00621233
		456	0.00658268
		457.5	0.0071214
		459	0.00790111
		460.5	0.00893726
		462	0.0101593
		463.5	0.0114303
		465	0.0126142
		466.5	0.0136506
		468	0.014574
		469.5	0.0154518
		471	0.016284
		472.5	0.0169562
		474	0.0172938
		475.5	0.0171736
		477	0.0165999
		478.5	0.0156913
		480	0.0146076
		481.5	0.0134813
		483	0.01239
		484.5	0.0113645
		486	0.0104091
		487.5	0.00951892
		489	0.00869032
		490.5	0.0079245
		492	0.00722599
		493.5	0.00659975
		495	0.00605008
		496.5	0.00558238
		498	0.00520602
		499.5	0.00493427
		501	0.00477845
		502.5	0.0047367
		504	0.00478334
		505.5	0.00486649
		507	0.00491974
		508.5	0.00488508
		510	0.00473456
		511.5	0.00447716
		513	0.00414625
		514.5	0.00377687
		516	0.00338919
		517.5	0.00298879
		519	0.00258016
		520.5	0.00218023
		522	0.00182083
		523.5	0.00153794
		525	0.0013557
		526.5	0.00127488
		528	0.00127243
		529.5	0.00131133
		531	0.00135553
		532.5	0.00138275
		534	0.00139009
		535.5	0.00139132
		537	0.00140833
		538.5	0.00146022
		540	0.00155357
		541.5	0.0016763
		543	0.00179791
		544.5	0.00187783
		546	0.0018804
		547.5	0.00179004
		549	0.00161844
		550.5	0.0013995
		552	0.0011752
		553.5	0.000980433
		555	0.000834048
		556.5	0.000738129
		558	0.000682651
		559.5	0.00065181
		561	0.000629255
		562.5	0.000601694
		564	0.000560886
		565.5	0.000504274
		567	0.000434374
		568.5	0.000357093
		570	0.000279713
		571.5	0.000208791
		573	0.000148951
		574.5	0.000102442
		576	6.95103e-05
		577.5	4.92587e-05
		579	4.06126e-05
		580.5	4.3159e-05
		582	5.75723e-05
		583.5	8.56666e-05
		585	0.000129975
		586.5	0.000192892
		588	0.000275525
		589.5	0.000376504
		591	0.000491114
		592.5	0.000611068
		594	0.000725317
		595.5	0.000821721
		597	0.000889235
		598.5	0.000920177
		600	0.000911742
		601.5	0.000866496
		603	0.000791624
		604.5	0.000697547
		606	0.000596104
		607.5	0.000498938
		609	0.000416423
		610.5	0.000357051
		612	0.000327108
		613.5	0.0003304
		615	0.000367855
		616.5	0.000437123
		618	0.000532364
		619.5	0.000644765
		621	0.000763751
		622.5	0.000878883
		624	0.000981863
		625.5	0.00106794
		627	0.00113614
		628.5	0.00118828
		630	0.00122711
		631.5	0.00125443
		633	0.00126989
		634.5	0.00127099
		636	0.00125412
		637.5	0.00121625
		639	0.00115649
		640.5	0.00107714
		642	0.00098388
		643.5	0.000885054
		645	0.00079048
		646.5	0.000709966
		648	0.000651935
		649.5	0.00062237
		651	0.000624194
		652.5	0.000657095
		654	0.000717741
		655.5	0.000800301
		657	0.000897068
		658.5	0.000999207
		660	0.00109746
		661.5	0.00118286
		663	0.00124743
		664.5	0.00128494
		666	0.00129158
		667.5	0.00126651
		669	0.00121204
		670.5	0.00113332
		672	0.00103752
		673.5	0.000932626
		675	0.000826131
		676.5	0.000724095
		678	0.000630389
		679.5	0.000546778
		681	0.000473284
		682.5	0.000408825
		684	0.000351884
		685.5	0.000301023
		687	0.000255171
		688.5	0.000213706
		690	0.000176373
		691.5	0.000143147
		693	0.000114072
		694.5	8.91453e-05
		696	6.8292e-05
		697.5	5.12429e-05
		699	3.76589e-05
		700.5	2.71112e-05
		702	1.91461e-05
		703.5	1.32995e-05
		705	9.15074e-06
		706.5	6.32856e-06
		708	4.55674e-06
		709.5	3.60831e-06
		711	3.33915e-06
		712.5	3.66895e-06
		714	4.60214e-06
		715.5	6.17547e-06
		717	8.48741e-06
		718.5	1.16798e-05
		720	1.59295e-05
		721.5	2.14382e-05
		723	2.84195e-05
		724.5	3.70753e-05
		726	4.76067e-05
		727.5	6.01384e-05
		729	7.47362e-05
		730.5	9.13694e-05
		732	0.00010989
		733.5	0.000130017
		735	0.00015133
		736.5	0.000173274
		738	0.000195175
		739.5	0.000216269
		741	0.000235747
		742.5	0.000252821
		744	0.00026671
		745.5	0.000276805
		747	0.00028262
		748.5	0.000283891
		750	0.000280579
		751.5	0.000272874
		753	0.000261195
		754.5	0.000246162
		756	0.000228561
		757.5	0.000209298
		759	0.000189358
		760.5	0.000169764
		762	0.000151537
		763.5	0.000135672
		765	0.000123116
		766.5	0.000114758
		768	0.000111409
		769.5	0.000113787
		771	0.00012249
		772.5	0.000137954
		774	0.000160409
		775.5	0.00018981
		777	0.000225783
		778.5	0.000267568
		780	0.000313989
		781.5	0.000363456
		783	0.000414002
		784.5	0.000463381
		786	0.000509195
		787.5	0.000549065
		789	0.000580814
		790.5	0.000602653
		792	0.000613332
		793.5	0.000612252
		795	0.000599513
		796.5	0.000575892
		798	0.000542765
		799.5	0.000501965
		801	0.000455615
		802.5	0.000405936
		804	0.000355106
		805.5	0.000305057
		807	0.000257414
		808.5	0.000213412
		810	0.000173884
		811.5	0.000139277
		813	0.00010971
		814.5	8.50149e-05
		816	6.48404e-05
		817.5	4.87073e-05
		819	3.60748e-05
		820.5	2.63929e-05
		822	1.91417e-05
		823.5	1.38581e-05
		825	1.01518e-05
		826.5	7.71371e-06
		828	6.31777e-06
		829.5	5.81979e-06
		831	6.15381e-06
		832.5	7.32745e-06
		834	9.41608e-06
		835.5	1.25648e-05
		837	1.6944e-05
		838.5	2.27796e-05
		840	3.03396e-05
		841.5	3.98571e-05
		843	5.15615e-05
		844.5	6.55986e-05
		846	8.20456e-05
		847.5	0.000100842
		849	0.000121792
		850.5	0.000144507
		852	0.000168428
		853.5	0.000192827
		855	0.000216835
		856.5	0.000239491
		858	0.000259798
		859.5	0.0002768
		861	0.000289652
		862.5	0.000297692
		864	0.0003005
		865.5	0.000297928
		867	0.000290122
		868.5	0.000277502
		870	0.000260729
		871.5	0.000240648
		873	0.000218215
		874.5	0.000194426
		876	0.000170245
		877.5	0.000146541
		879	0.000124042
		880.5	0.00010331
		882	8.47244e-05
		883.5	6.84943e-05
		885	5.46739e-05
		886.5	4.31907e-05
		888	3.3878e-05
		889.5	2.65067e-05
		891	2.08149e-05
		892.5	1.65326e-05
		894	1.34093e-05
		895.5	1.11924e-05
		897	9.68477e-06
		898.5	8.71466e-06
		900	8.14348e-06
		901.5	7.86277e-06
		903	7.79018e-06
		904.5	7.86497e-06
		906	8.04353e-06
		907.5	8.29541e-06
		909	8.59992e-06
		910.5	8.94342e-06
		912	9.31717e-06
		913.5	9.7158e-06
		915	1.01362e-05
		916.5	1.05721e-05
		918	1.1034e-05
		919.5	1.1514e-05
		921	1.20126e-05
		922.5	1.25306e-05
		924	1.30685e-05
		925.5	1.3627e-05
		927	1.42067e-05
		928.5	1.48083e-05
		930	1.54324e-05
		931.5	1.60797e-05
		933	1.6751e-05
		934.5	1.74469e-05
		936	1.81681e-05
		937.5	1.89153e-05
		939	1.97047e-05
		940.5	2.0522e-05
		942	2.13823e-05
		943.5	2.22982e-05
		945	2.32912e-05
		946.5	2.43958e-05
		948	2.56666e-05
		949.5	2.71875e-05
		951	2.90823e-05
		952.5	3.15282e-05
		954	3.47677e-05
		955.5	3.912e-05
		957	4.49852e-05
		958.5	5.28389e-05
		960	6.32118e-05
		961.5	7.66505e-05
		963	9.36579e-05
		964.5	0.000114614
		966	0.000139685
		967.5	0.000168733
		969	0.000201237
		970.5	0.000236248
		972	0.000272398
		973.5	0.00030796
		975	0.000340979
		976.5	0.000369448
		978	0.000391517
		979.5	0.000405703
		981	0.000411071
		982.5	0.000407346
		984	0.000394952
		985.5	0.000374955
		987	0.000348933
		988.5	0.000318787
		990	0.000286531
		991.5	0.000254085
		993	0.000223106
		994.5	0.000194874
		996	0.000170245
		997.5	0.00014965
		999	0.000133155
		1000.5	0.000120539
		1002	0.000111387
		1003.5	0.00010518
		1005	0.00010137
		1006.5	9.9435e-05
		1008	9.89136e-05
		1009.5	9.94223e-05
		1011	0.000100658
		1012.5	0.000102392
		1014	0.00010446
		1015.5	0.000106745
		1017	0.000109169
		1018.5	0.000111682
		1020	0.000114251
		1021.5	0.000116855
		1023	0.000119481
		1024.5	0.000122115
		1026	0.000124765
		1027.5	0.000127417
		1029	0.000130068
		1030.5	0.000132715
		1032	0.000135355
		1033.5	0.000137985
		1035	0.000140602
		1036.5	0.000143204
		1038	0.000145787
		1039.5	0.000148348
		1041	0.000150884
		1042.5	0.000153392
		1044	0.000155869
		1045.5	0.00015832
		1047	0.000160726
		1048.5	0.000163091
		1050	0.000165412
		1051.5	0.000167686
		1053	0.00016991
		1054.5	0.00017208
		1056	0.000174194
		1057.5	0.000176249
		1059	0.000178242
		1060.5	0.000180169
		1062	0.000182028
		1063.5	0.000183816
		1065	0.000185531
		1066.5	0.00018717
		1068	0.000188729
		1069.5	0.000190208
		1071	0.000191603
		1072.5	0.000192913
		1074	0.000194135
		1075.5	0.000195267
		1077	0.000196307
		1078.5	0.000197255
		1080	0.000198107
		1081.5	0.000198864
		1083	0.000199523
		1084.5	0.000200083
		1086	0.000200544
		1087.5	0.000200905
		1089	0.000201164
		1090.5	0.000201322
		1092	0.000201379
		1093.5	0.000201333
		1095	0.000201185
		1096.5	0.000200936
		1098	0.000200585
		1099.5	0.000200134
		1101	0.000199582
		1102.5	0.000198931
		1104	0.000198181
		1105.5	0.000197334
		1107	0.000196392
		1108.5	0.000195355
		1110	0.000194225
		1111.5	0.000193004
		1113	0.000191695
		1114.5	0.000190298
		1116	0.000188817
		1117.5	0.000187253
		1119	0.00018561
		1120.5	0.000183889
		1122	0.000182093
		1123.5	0.000180226
		1125	0.00017829
		1126.5	0.000176288
		1128	0.000174224
		1129.5	0.000172099
		1131	0.000169919
		1132.5	0.000167686
		1134	0.000165403
		1135.5	0.000163074
		1137	0.000160702
		1138.5	0.000158292
		1140	0.000155846
		1141.5	0.000153368
		1143	0.000150862
		1144.5	0.000148332
		1146	0.00014578
		1147.5	0.000143211
		1149	0.000140628
		1150.5	0.000138036
		1152	0.000135436
		1153.5	0.000132834
		1155	0.000130232
		1156.5	0.000127634
		1158	0.000125043
		1159.5	0.000122471
		1161	0.000119907
		1162.5	0.000117359
		1164	0.000114832
		1165.5	0.000112329
		1167	0.000109852
		1168.5	0.000107405
		1170	0.000104991
		1171.5	0.000102611
		1173	0.000100269
		1174.5	9.79678e-05
		1176	9.57091e-05
		1177.5	9.34956e-05
		1179	9.13295e-05
		1180.5	8.92129e-05
		1182	8.71479e-05
		1183.5	8.51365e-05
		1185	8.31804e-05
		1186.5	8.12815e-05
		1188	7.94414e-05
		1189.5	7.76616e-05
		1191	7.59435e-05
		1192.5	7.42885e-05
		1194	7.26979e-05
		1195.5	7.11727e-05
		1197	6.97141e-05
		1198.5	6.83231e-05
		1200	6.70005e-05
		1201.5	6.57472e-05
		1203	6.45639e-05
		1204.5	6.34514e-05
		1206	6.24101e-05
		1207.5	6.14407e-05
		1209	6.05437e-05
		1210.5	5.97195e-05
		1212	5.89685e-05
		1213.5	5.82911e-05
		1215	5.76875e-05
		1216.5	5.71581e-05
		1218	5.67031e-05
		1219.5	5.63227e-05
		1221	5.60171e-05
		1222.5	5.57865e-05
		1224	5.5631e-05
		1225.5	5.55508e-05
		1227	5.55459e-05
		1228.5	5.56165e-05
		1230	5.57626e-05
		1231.5	5.59842e-05
		1233	5.62815e-05
		1234.5	5.66544e-05
		1236	5.7103e-05
		1237.5	5.7627e-05
		1239	5.82265e-05
		1240.5	5.89013e-05
		1242	5.96512e-05
		1243.5	6.04759e-05
		1245	6.13752e-05
		1246.5	6.23486e-05
		1248	6.33956e-05
		1249.5	6.45157e-05
		1251	6.5708e-05
		1252.5	6.69719e-05
		1254	6.83062e-05
		1255.5	6.97099e-05
		1257	7.11816e-05
		1258.5	7.27199e-05
		1260	7.4323e-05
		1261.5	7.59892e-05
		1263	7.77163e-05
		1264.5	7.95019e-05
		1266	8.13435e-05
		1267.5	8.32382e-05
		1269	8.51829e-05
		1270.5	8.71743e-05
		1272	8.92088e-05
		1273.5	9.12823e-05
		1275	9.33907e-05
		1276.5	9.55295e-05
		1278	9.76939e-05
		1279.5	9.98789e-05
		1281	0.000102079
		1282.5	0.000104289
		1284	0.000106503
		1285.5	0.000108714
		1287	0.000110917
		1288.5	0.000113105
		1290	0.000115272
		1291.5	0.00011741
		1293	0.000119512
		1294.5	0.000121573
		1296	0.000123583
		1297.5	0.000125538
		1299	0.000127428
		1300.5	0.000129248
		1302	0.00013099
		1303.5	0.000132648
		1305	0.000134215
		1306.5	0.000135684
		1308	0.000137049
		1309.5	0.000138304
		1311	0.000139444
		1312.5	0.000140462
		1314	0.000141356
		1315.5	0.000142119
		1317	0.000142747
		1318.5	0.000143231
		1320	0.000143582
		1321.5	0.000143789
		1323	0.000143852
		1324.5	0.000143767
		1326	0.000143536
		1327.5	0.000143156
		1329	0.000142629
		1330.5	0.000141956
		1332	0.000141137
		1333.5	0.000140168
		1335	0.000139068
		1336.5	0.00013783
		1338	0.000136459
		1339.5	0.00013496
		1341	0.000133336
		1342.5	0.000131593
		1344	0.000129736
		1345.5	0.000127772
		1347	0.000125707
		1348.5	0.000123547
		1350	0.0001213
		1351.5	0.000118972
		1353	0.00011657
		1354.5	0.000114103
		1356	0.000111578
		1357.5	0.000109001
		1359	0.000106382
		1360.5	0.000103727
		1362	0.000101043
		1363.5	9.83392e-05
		1365	9.56215e-05
		1366.5	9.28897e-05
		1368	9.01666e-05
		1369.5	8.74421e-05
		1371	8.47397e-05
		1372.5	8.20565e-05
		1374	7.93982e-05
		1375.5	7.67702e-05
		1377	7.41777e-05
		1378.5	7.16253e-05
		1380	6.91175e-05
		1381.5	6.66582e-05
		1383	6.4251e-05
		1384.5	6.18992e-05
		1386	5.96056e-05
		1387.5	5.73729e-05
		1389	5.5203e-05
		1390.5	5.30978e-05
		1392	5.10589e-05
		1393.5	4.90872e-05
		1395	4.71836e-05
		1396.5	4.53487e-05
		1398	4.35826e-05
		1399.5	4.18854e-05
		1401	4.02567e-05
		1402.5	3.86959e-05
		1404	3.72025e-05
		1405.5	3.57754e-05
		1407	3.44135e-05
		1408.5	3.31156e-05
		1410	3.18803e-05
		1411.5	3.0706e-05
		1413	2.95911e-05
		1414.5	2.85338e-05
		1416	2.75325e-05
		1417.5	2.65851e-05
		1419	2.56899e-05
		1420.5	2.48448e-05
		1422	2.4048e-05
		1423.5	2.32974e-05
		1425	2.25911e-05
		1426.5	2.19272e-05
		1428	2.13037e-05
		1429.5	2.07187e-05
		1431	2.01704e-05
		1432.5	1.96569e-05
		1434	1.91765e-05
		1435.5	1.87274e-05
		1437	1.83079e-05
		1438.5	1.79165e-05
		1440	1.75516e-05
		1441.5	1.72116e-05
		1443	1.68951e-05
		1444.5	1.66007e-05
		1446	1.63272e-05
		1447.5	1.60819e-05
		1449	1.58477e-05
		1450.5	1.5631e-05
		1452	1.54306e-05
		1453.5	1.52457e-05
		1455	1.50752e-05
		1456.5	1.49184e-05
		1458	1.47744e-05
		1459.5	1.46423e-05
		1461	1.45217e-05
		1462.5	1.44117e-05
		1464	1.43117e-05
		1465.5	1.42213e-05
		1467	1.414e-05
		1468.5	1.40672e-05
		1470	1.40025e-05
		1471.5	1.39457e-05
		1473	1.38963e-05
		1474.5	1.38541e-05
		1476	1.38189e-05
		1477.5	1.37905e-05
		1479	1.37686e-05
		1480.5	1.37533e-05
		1482	1.37445e-05
		1483.5	1.3742e-05
		1485	1.37461e-05
		1486.5	1.37566e-05
		1488	1.37737e-05
		1489.5	1.37976e-05
		1491	1.38284e-05
		1492.5	1.38665e-05
		1494	1.39119e-05
		1495.5	1.39652e-05
		1497	1.40191e-05
		1498.5	1.40903e-05
		1500	1.41703e-05
		1501.5	1.42598e-05
		1503	1.43593e-05
		1504.5	1.44695e-05
		1506	1.45909e-05
		1507.5	1.47244e-05
		1509	1.48707e-05
		1510.5	1.50307e-05
		1512	1.52052e-05
		1513.5	1.53951e-05
		1515	1.56015e-05
		1516.5	1.58252e-05
		1518	1.60674e-05
		1519.5	1.63291e-05
		1521	1.66115e-05
		1522.5	1.69158e-05
		1524	1.72431e-05
		1525.5	1.75946e-05
		1527	1.79717e-05
		1528.5	1.83755e-05
		1530	1.88074e-05
		1531.5	1.92686e-05
		1533	1.97604e-05
		1534.5	2.02841e-05
		1536	2.08409e-05
		1537.5	2.14321e-05
		1539	2.20589e-05
		1540.5	2.27224e-05
		1542	2.34237e-05
		1543.5	2.41639e-05
		1545	2.4944e-05
		1546.5	2.57649e-05
		1548	2.66272e-05
		1549.5	2.75319e-05
		1551	2.84793e-05
		1552.5	2.947e-05
		1554	3.05043e-05
		1555.5	3.15823e-05
		1557	3.27041e-05
		1558.5	3.38694e-05
		1560	3.50704e-05
		1561.5	3.63223e-05
		1563	3.76162e-05
		1564.5	3.8951e-05
		1566	4.03255e-05
		1567.5	4.17385e-05
		1569	4.31883e-05
		1570.5	4.46731e-05
		1572	4.61909e-05
		1573.5	4.77393e-05
		1575	4.93159e-05
		1576.5	5.09179e-05
		1578	5.25424e-05
		1579.5	5.41862e-05
		1581	5.58458e-05
		1582.5	5.75177e-05
		1584	5.91981e-05
		1585.5	6.08829e-05
		1587	6.25682e-05
		1588.5	6.42494e-05
		1590	6.59223e-05
		1591.5	6.75823e-05
		1593	6.92246e-05
		1594.5	7.08446e-05
		1596	7.24375e-05
		1597.5	7.39983e-05
		1599	7.55224e-05
		1600.5	7.70048e-05
		1602	7.84408e-05
		1603.5	7.98256e-05
		1605	8.11547e-05
		1606.5	8.24233e-05
		1608	8.36273e-05
		1609.5	8.47623e-05
		1611	8.58244e-05
		1612.5	8.68096e-05
		1614	8.77145e-05
		1615.5	8.85357e-05
		1617	8.92701e-05
		1618.5	8.9915e-05
		1620	9.04679e-05
		1621.5	9.09267e-05
		1623	9.12985e-05
		1624.5	9.15653e-05
		1626	9.17338e-05
		1627.5	9.18035e-05
		1629	9.17739e-05
		1630.5	9.16451e-05
		1632	9.14176e-05
		1633.5	9.10922e-05
		1635	9.067e-05
		1636.5	9.01526e-05
		1638	8.95418e-05
		1639.5	8.884e-05
		1641	8.80496e-05
		1642.5	8.71735e-05
		1644	8.62149e-05
		1645.5	8.51772e-05
		1647	8.4064e-05
		1648.5	8.28794e-05
		1650	8.16274e-05
		1651.5	8.03124e-05
		1653	7.89389e-05
		1654.5	7.75114e-05
		1656	7.60348e-05
		1657.5	7.45137e-05
		1659	7.29532e-05
		1660.5	7.13582e-05
		1662	6.97336e-05
		1663.5	6.80842e-05
		1665	6.64152e-05
		1666.5	6.47312e-05
		1668	6.3037e-05
		1669.5	6.13374e-05
		1671	5.96368e-05
		1672.5	5.79397e-05
		1674	5.62504e-05
		1675.5	5.4573e-05
		1677	5.29114e-05
		1678.5	5.12693e-05
		1680	4.96505e-05
		1681.5	4.80581e-05
		1683	4.64953e-05
		1684.5	4.49651e-05
		1686	4.34703e-05
		1687.5	4.20131e-05
		1689	4.05961e-05
		1690.5	3.92212e-05
		1692	3.78903e-05
		1693.5	3.6605e-05
		1695	3.53667e-05
		1696.5	3.41768e-05
		1698	3.30362e-05
		1699.5	3.19458e-05
		1701	3.09064e-05
		1702.5	2.99267e-05
		1704	2.89921e-05
		1705.5	2.81098e-05
		1707	2.72799e-05
		1708.5	2.65025e-05
		1710	2.57775e-05
		1711.5	2.51047e-05
		1713	2.44838e-05
		1714.5	2.39145e-05
		1716	2.33964e-05
		1717.5	2.29291e-05
		1719	2.2512e-05
		1720.5	2.21447e-05
		1722	2.18266e-05
		1723.5	2.15571e-05
		1725	2.13358e-05
		1726.5	2.11715e-05
		1728	2.10464e-05
		1729.5	2.09682e-05
		1731	2.09364e-05
		1732.5	2.09506e-05
		1734	2.10104e-05
		1735.5	2.11157e-05
		1737	2.12662e-05
		1738.5	2.14617e-05
		1740	2.17022e-05
		1741.5	2.19877e-05
		1743	2.23182e-05
		1744.5	2.26939e-05
		1746	2.31151e-05
		1747.5	2.35821e-05
		1749	2.40954e-05
		1750.5	2.46554e-05
		1752	2.52629e-05
		1753.5	2.59184e-05
		1755	2.66229e-05
		1756.5	2.73772e-05
		1758	2.81823e-05
		1759.5	2.90394e-05
		1761	2.99497e-05
		1762.5	3.09143e-05
		1764	3.19347e-05
		1765.5	3.30123e-05
		1767	3.41486e-05
		1768.5	3.53452e-05
		1770	3.66037e-05
		1771.5	3.79259e-05
		1773	3.93134e-05
		1774.5	4.0768e-05
		1776	4.22916e-05
		1777.5	4.38859e-05
		1779	4.55526e-05
		1780.5	4.72936e-05
		1782	4.91105e-05
		1783.5	5.10051e-05
		1785	5.29789e-05
		1786.5	5.50333e-05
		1788	5.71698e-05
		1789.5	5.93896e-05
		1791	6.16938e-05
		1792.5	6.40831e-05
		1794	6.65584e-05
		1795.5	6.912e-05
		1797	7.17681e-05
		1798.5	7.45026e-05
		1800	7.7323e-05
		1801.5	8.02287e-05
		1803	8.32185e-05
		1804.5	8.6291e-05
		1806	8.94443e-05
		1807.5	9.26761e-05
		1809	9.59754e-05
		1810.5	9.93568e-05
		1812	0.000102807
		1813.5	0.000106322
		1815	0.000109898
		1816.5	0.000113528
		1818	0.000117209
		1819.5	0.000120933
		1821	0.000124695
		1822.5	0.000128487
		1824	0.000132303
		1825.5	0.000136134
		1827	0.000139973
		1828.5	0.00014381
		1830	0.000147638
		1831.5	0.000151446
		1833	0.000155226
		1834.5	0.000158968
		1836	0.000162662
		1837.5	0.000166298
		1839	0.000169866
		1840.5	0.000173356
		1842	0.000176758
		1843.5	0.000180062
		1845	0.000183258
		1846.5	0.000186337
		1848	0.000189288
		1849.5	0.000192103
		1851	0.000194773
		1852.5	0.000197289
		1854	0.000199643
		1855.5	0.000201828
		1857	0.000203837
		1858.5	0.000205663
		1860	0.000207299
		1861.5	0.000208742
		1863	0.000209986
		1864.5	0.000211027
		1866	0.000211862
		1867.5	0.000212488
		1869	0.000212903
		1870.5	0.000213107
		1872	0.000213098
		1873.5	0.000212877
		1875	0.000212446
		1876.5	0.000211805
		1878	0.000210957
		1879.5	0.000209905
		1881	0.000208652
		1882.5	0.000207203
		1884	0.000205563
		1885.5	0.000203736
		1887	0.00020173
		1888.5	0.000199549
		1890	0.000197201
		1891.5	0.000194692
		1893	0.000192031
		1894.5	0.000189225
		1896	0.000186282
		1897.5	0.000183211
		1899	0.00018002
		1900.5	0.000176716
		1902	0.000173311
		1903.5	0.000169811
		1905	0.000166226
		1906.5	0.000162565
		1908	0.000158836
		1909.5	0.000155048
		1911	0.000151211
		1912.5	0.000147332
		1914	0.00014342
		1915.5	0.000139483
		1917	0.000135529
		1918.5	0.000131566
		1920	0.000127602
		1921.5	0.000123644
		1923	0.000119699
		1924.5	0.000115773
		1926	0.000111874
		1927.5	0.000108008
		1929	0.00010418
		1930.5	0.000100396
		1932	9.66615e-05
		1933.5	9.29813e-05
		1935	8.936e-05
		1936.5	8.5802e-05
		1938	8.23111e-05
		1939.5	7.8891e-05
		1941	7.5545e-05
		1942.5	7.22761e-05
		1944	6.90868e-05
		1945.5	6.59796e-05
		1947	6.29563e-05
		1948.5	6.00188e-05
		1950	5.71685e-05
		1951.5	5.44063e-05
		1953	5.17332e-05
		1954.5	4.91497e-05
		1956	4.66561e-05
		1957.5	4.42524e-05
		1959	4.19384e-05
		1960.5	3.97136e-05
		1962	3.75774e-05
		1963.5	3.5529e-05
		1965	3.35671e-05
		1966.5	3.16907e-05
		1968	2.98982e-05
		1969.5	2.81882e-05
		1971	2.65588e-05
		1972.5	2.50084e-05
		1974	2.35348e-05
		1975.5	2.21361e-05
		1977	2.08102e-05
		1978.5	1.95548e-05
		1980	1.83676e-05
		1981.5	1.72463e-05
		1983	1.61886e-05
		1984.5	1.51921e-05
		1986	1.42543e-05
		1987.5	1.33729e-05
		1989	1.25454e-05
		1990.5	1.17695e-05
		1992	1.10428e-05
		1993.5	1.03628e-05
		1995	9.7274e-06
		1996.5	9.13423e-06
		1998	8.58108e-06
		1999.5	8.06578e-06
		2001	7.58624e-06
		2002.5	7.1404e-06
		2004	6.72628e-06
		2005.5	6.34198e-06
		2007	5.98564e-06
		2008.5	5.6555e-06
		2010	5.34985e-06
		2011.5	5.06709e-06
		2013	4.80566e-06
		2014.5	4.56409e-06
		2016	4.34097e-06
		2017.5	4.13499e-06
		2019	3.94488e-06
		2020.5	3.76946e-06
		2022	3.59962e-06
		2023.5	3.4516e-06
		2025	3.31492e-06
		2026.5	3.18869e-06
		2028	3.07208e-06
		2029.5	2.9643e-06
		2031	2.86464e-06
		2032.5	2.7724e-06
		2034	2.68695e-06
		2035.5	2.60772e-06
		2037	2.53416e-06
		2038.5	2.46578e-06
		2040	2.4021e-06
		2041.5	2.34271e-06
		2043	2.28721e-06
		2044.5	2.23526e-06
		2046	2.18651e-06
		2047.5	2.14068e-06
		2049	2.09749e-06
		2050.5	2.0567e-06
		2052	2.01806e-06
		2053.5	1.98139e-06
		2055	1.94649e-06
		2056.5	1.9132e-06
		2058	1.88136e-06
		2059.5	1.85084e-06
		2061	1.82152e-06
		2062.5	1.79327e-06
		2064	1.76601e-06
		2065.5	1.73964e-06
		2067	1.71409e-06
		2068.5	1.68927e-06
		2070	1.66514e-06
		2071.5	1.63367e-06
		2073	1.61162e-06
		2074.5	1.58999e-06
		2076	1.56153e-06
		2077.5	1.54173e-06
		2079	1.52214e-06
		2080.5	1.50273e-06
		2082	1.48352e-06
		2083.5	1.46449e-06
		2085	1.44566e-06
		2086.5	1.42701e-06
		2088	1.40855e-06
		2089.5	1.39028e-06
		2091	1.3722e-06
		2092.5	1.3543e-06
		2094	1.33658e-06
		2095.5	1.31904e-06
		2097	1.30169e-06
		2098.5	1.28451e-06
		2100	1.26752e-06
		2101.5	1.2507e-06
		2103	1.23406e-06
		2104.5	1.2176e-06
		2106	1.20131e-06
		2107.5	1.18519e-06
		2109	1.16925e-06
		2110.5	1.15347e-06
		2112	1.13787e-06
		2113.5	1.12244e-06
		2115	1.10717e-06
		2116.5	1.09207e-06
		2118	1.07714e-06
		2119.5	1.06237e-06
		2121	1.04776e-06
		2122.5	1.03332e-06
		2124	1.01904e-06
		2125.5	1.00491e-06
		2127	9.90946e-07
		2128.5	9.77139e-07
		2130	9.63487e-07
		2131.5	9.49991e-07
		2133	9.36649e-07
		2134.5	9.23459e-07
		2136	9.10421e-07
		2137.5	8.97533e-07
		2139	8.84795e-07
		2140.5	8.72205e-07
		2142	8.59761e-07
		2143.5	8.47464e-07
		2145	8.35311e-07
		2146.5	8.23301e-07
		2148	8.11433e-07
		2149.5	7.99707e-07
		2151	7.8812e-07
		2152.5	7.76673e-07
		2154	7.65362e-07
		2155.5	7.54189e-07
		2157	7.4315e-07
		2158.5	7.32246e-07
		2160	7.21474e-07
		2161.5	7.10834e-07
		2163	7.00325e-07
		2164.5	6.89946e-07
		2166	6.79694e-07
		2167.5	6.6957e-07
		2169	6.59572e-07
		2170.5	6.49699e-07
		2172	6.3995e-07
		2173.5	6.30323e-07
		2175	6.20818e-07
		2176.5	6.11433e-07
		2178	6.02168e-07
		2179.5	5.93021e-07
		2181	5.8399e-07
		2182.5	5.75076e-07
		2184	5.66276e-07
		2185.5	5.57591e-07
		2187	5.49018e-07
		2188.5	5.40556e-07
		2190	5.32205e-07
		2191.5	5.23963e-07
		2193	5.1583e-07
		2194.5	5.07803e-07
		2196	4.99883e-07
		2197.5	4.92068e-07
		2199	4.84357e-07
		2200.5	4.76749e-07
		2202	4.69243e-07
		2203.5	4.61837e-07
		2205	4.54532e-07
		2206.5	4.47325e-07
		2208	4.40216e-07
		2209.5	4.33204e-07
		2211	4.26287e-07
		2212.5	4.19465e-07
		2214	4.12737e-07
		2215.5	4.06101e-07
		2217	3.99558e-07
		2218.5	3.93104e-07
		2220	3.86741e-07
		2221.5	3.80466e-07
		2223	3.74279e-07
		2224.5	3.68179e-07
		2226	3.62165e-07
		2227.5	3.56236e-07
		2229	3.5039e-07
		2230.5	3.44628e-07
		2232	3.38947e-07
		2233.5	3.33348e-07
		2235	3.27829e-07
		2236.5	3.22389e-07
		2238	3.17028e-07
		2239.5	3.11744e-07
		2241	3.06536e-07
		2242.5	3.01405e-07
		2244	2.96348e-07
		2245.5	2.91365e-07
		2247	2.86455e-07
		2248.5	2.81617e-07
		2250	2.7685e-07
		2251.5	2.72154e-07
		2253	2.67528e-07
		2254.5	2.6297e-07
		2256	2.58481e-07
		2257.5	2.54058e-07
		2259	2.49702e-07
		2260.5	2.45411e-07
		2262	2.41185e-07
		2263.5	2.37023e-07
		2265	2.32924e-07
		2266.5	2.28887e-07
		2268	2.24912e-07
		2269.5	2.20997e-07
		2271	2.17143e-07
		2272.5	2.13347e-07
		2274	2.0961e-07
		2275.5	2.05931e-07
		2277	2.02309e-07
		2278.5	1.98743e-07
		2280	1.95233e-07
		2281.5	1.91777e-07
		2283	1.88376e-07
		2284.5	1.85028e-07
		2286	1.81733e-07
		2287.5	1.78489e-07
		2289	1.75297e-07
		2290.5	1.72156e-07
		2292	1.69064e-07
		2293.5	1.66022e-07
		2295	1.63029e-07
		2296.5	1.60083e-07
		2298	1.57185e-07
		2299.5	1.54333e-07
		2301	1.51528e-07
		2302.5	1.48767e-07
		2304	1.46052e-07
		2305.5	1.43381e-07
		2307	1.40753e-07
		2308.5	1.38169e-07
		2310	1.35627e-07
		2311.5	1.33126e-07
		2313	1.30667e-07
		2314.5	1.28248e-07
		2316	1.2587e-07
		2317.5	1.23531e-07
		2319	1.2123e-07
		2320.5	1.18969e-07
		2322	1.16745e-07
		2323.5	1.14558e-07
		2325	1.12408e-07
		2326.5	1.10294e-07
		2328	1.08216e-07
		2329.5	1.06173e-07
		2331	1.04165e-07
		2332.5	1.02191e-07
		2334	1.0025e-07
		2335.5	9.83431e-08
		2337	9.64685e-08
		2338.5	9.46261e-08
		2340	9.28154e-08
		2341.5	9.10359e-08
		2343	8.92871e-08
		2344.5	8.75687e-08
		2346	8.58802e-08
		2347.5	8.4221e-08
		2349	8.25908e-08
		2350.5	8.09891e-08
		2352	7.94155e-08
		2353.5	7.78695e-08
		2355	7.63508e-08
		2356.5	7.48589e-08
		2358	7.33934e-08
		2359.5	7.19538e-08
		2361	7.05399e-08
		2362.5	6.91512e-08
		2364	6.77872e-08
		2365.5	6.64477e-08
		2367	6.51322e-08
		2368.5	6.38403e-08
		2370	6.25717e-08
		2371.5	6.13261e-08
		2373	6.01029e-08
		2374.5	5.8902e-08
		2376	5.77229e-08
		2377.5	5.65652e-08
		2379	5.54287e-08
		2380.5	5.4313e-08
		2382	5.32178e-08
		2383.5	5.21427e-08
		2385	5.10874e-08
		2386.5	5.00516e-08
		2388	4.90349e-08
		2389.5	4.80371e-08
		2391	4.70578e-08
		2392.5	4.60968e-08
		2394	4.51536e-08
		2395.5	4.42282e-08
		2397	4.332e-08
		2398.5	4.2429e-08
		2400	4.15547e-08
		2401.5	4.06969e-08
		2403	3.98553e-08
		2404.5	3.90296e-08
		2406	3.82196e-08
		2407.5	3.7425e-08
		2409	3.66456e-08
		2410.5	3.5881e-08
		2412	3.51311e-08
		2413.5	3.43956e-08
		2415	3.36742e-08
		2416.5	3.29667e-08
		2418	3.22728e-08
		2419.5	3.15924e-08
		2421	3.09251e-08
		2422.5	3.02708e-08
		2424	2.96293e-08
		2425.5	2.90002e-08
		2427	2.83835e-08
		2428.5	2.77788e-08
		2430	2.7186e-08
		2431.5	2.66048e-08
		2433	2.60351e-08
		2434.5	2.54766e-08
		2436	2.49292e-08
		2437.5	2.43926e-08
		2439	2.38667e-08
		2440.5	2.33512e-08
		2442	2.2846e-08
		2443.5	2.23509e-08
		2445	2.18657e-08
		2446.5	2.13903e-08
		2448	2.09244e-08
		2449.5	2.04678e-08
		2451	2.00205e-08
		2452.5	1.95822e-08
		2454	1.91528e-08
		2455.5	1.87321e-08
		2457	1.832e-08
		2458.5	1.79163e-08
		2460	1.75208e-08
		2461.5	1.71334e-08
		2463	1.67539e-08
		2464.5	1.63822e-08
		2466	1.60182e-08
		2467.5	1.56616e-08
		2469	1.53125e-08
		2470.5	1.49705e-08
		2472	1.46357e-08
		2473.5	1.43077e-08
		2475	1.39867e-08
		2476.5	1.36723e-08
		2478	1.33644e-08
		2479.5	1.3063e-08
		2481	1.2768e-08
		2482.5	1.24791e-08
		2484	1.21963e-08
		2485.5	1.19195e-08
		2487	1.16485e-08
		2488.5	1.13832e-08
		2490	1.11236e-08
		2491.5	1.08695e-08
		2493	1.06208e-08
		2494.5	1.03774e-08
		2496	1.01392e-08
		2497.5	9.90604e-09
		2499	9.67792e-09
		2500.5	9.4547e-09
		2502	9.23629e-09
		2503.5	9.02258e-09
		2505	1.80293e-08
		2506.5	1.93837e-08
		2508	2.09892e-08
		2509.5	1.46688e-08
		2511	1.70806e-08
		2512.5	1.98621e-08
		2514	2.30652e-08
		2515.5	2.67486e-08
		2517	3.09782e-08
		2518.5	3.58279e-08
		2520	4.13808e-08
		2521.5	4.77296e-08
		2523	5.49779e-08
		2524.5	6.32412e-08
		2526	7.26478e-08
		2527.5	8.33406e-08
		2529	9.54778e-08
		2530.5	1.19633e-07
		2532	1.38323e-07
		2533.5	1.59911e-07
		2535	1.84856e-07
		2536.5	2.23162e-07
		2538	2.58224e-07
		2539.5	2.98807e-07
		2541	3.45795e-07
		2542.5	4.00211e-07
		2544	4.63241e-07
		2545.5	5.36256e-07
		2547	6.20837e-07
		2548.5	7.18804e-07
		2550	8.32252e-07
		2551.5	9.63575e-07
		2553	1.11551e-06
		2554.5	1.29118e-06
		2556	1.49411e-06
		2557.5	1.7283e-06
		2559	1.99826e-06
		2560.5	2.30902e-06
		2562	2.66622e-06
		2563.5	3.0761e-06
		2565	3.54559e-06
		2566.5	4.08227e-06
		2568	4.69445e-06
		2569.5	5.39118e-06
		2571	6.18219e-06
		2572.5	7.07796e-06
		2574	8.08964e-06
		2575.5	9.22904e-06
		2577	1.05085e-05
		2578.5	1.1941e-05
		2580	1.35397e-05
		2581.5	1.53182e-05
		2583	1.72901e-05
		2584.5	1.94691e-05
		2586	2.18683e-05
		2587.5	2.45007e-05
		2589	2.73783e-05
		2590.5	3.05121e-05
		2592	3.3912e-05
		2593.5	3.75861e-05
		2595	4.15409e-05
		2596.5	4.57805e-05
		2598	5.03066e-05
		2599.5	5.51184e-05
		2601	6.0212e-05
		2602.5	6.55804e-05
		2604	7.12134e-05
		2605.5	7.7097e-05
		2607	8.32141e-05
		2608.5	8.95439e-05
		2610	9.60621e-05
		2611.5	0.000102741
		2613	0.00010955
		2614.5	0.000116456
		2616	0.000123422
		2617.5	0.000130411
		2619	0.000137381
		2620.5	0.000144293
		2622	0.000151104
		2623.5	0.000157772
		2625	0.000164257
		2626.5	0.000170518
		2628	0.000176518
		2629.5	0.00018222
		2631	0.000187592
		2632.5	0.000192605
		2634	0.000197233
		2635.5	0.000201456
		2637	0.000205258
		2638.5	0.000208626
		2640	0.000211554
		2641.5	0.000214042
		2643	0.000216091
		2644.5	0.000217711
		2646	0.000218913
		2647.5	0.000219715
		2649	0.000220137
		2650.5	0.000220202
		2652	0.000219936
		2653.5	0.000219369
		2655	0.000218529
		2656.5	0.000217448
		2658	0.000216157
		2659.5	0.000214686
		2661	0.000213066
		2662.5	0.000211325
		2664	0.000209491
		2665.5	0.000207588
		2667	0.00020564
		2668.5	0.000203665
		2670	0.000201682
		2671.5	0.000199703
		2673	0.00019774
		2674.5	0.000195802
		2676	0.000193892
		2677.5	0.000192014
		2679	0.000190168
		2680.5	0.00018835
		2682	0.000186557
		2683.5	0.000184782
		2685	0.000183017
		2686.5	0.000181254
		2688	0.000179482
		2689.5	0.000177692
		2691	0.000175873
		2692.5	0.000174013
		2694	0.000172104
		2695.5	0.000170135
		2697	0.000168096
		2698.5	0.00016598
		2700	0.000163779
		2701.5	0.000161487
		2703	0.000159099
		2704.5	0.000156612
		2706	0.000154022
		2707.5	0.000151328
		2709	0.000148531
		2710.5	0.000145632
		2712	0.000142632
		2713.5	0.000139537
		2715	0.000136349
		2716.5	0.000133075
		2718	0.000129721
		2719.5	0.000126294
		2721	0.000122801
		2722.5	0.000119252
		2724	0.000115653
		2725.5	0.000112015
		2727	0.000108347
		2728.5	0.000104657
		2730	0.000100956
		2731.5	9.72521e-05
		2733	9.35553e-05
		2734.5	8.98744e-05
		2736	8.6218e-05
		2737.5	8.25948e-05
		2739	7.90127e-05
		2740.5	7.54794e-05
		2742	7.20022e-05
		2743.5	6.85879e-05
		2745	6.52425e-05
		2746.5	6.19719e-05
		2748	5.87747e-05
		2749.5	5.567e-05
		2751	5.26536e-05
		2752.5	4.97289e-05
		2754	4.68989e-05
		2755.5	4.41662e-05
		2757	4.15327e-05
		2758.5	3.89997e-05
		2760	3.65682e-05
		2761.5	3.42386e-05
		2763	3.20108e-05
		2764.5	2.98846e-05
		2766	2.78591e-05
		2767.5	2.5933e-05
		2769	2.4105e-05
		2770.5	2.23731e-05
		2772	2.07354e-05
		2773.5	1.91895e-05
		2775	1.77329e-05
		2776.5	1.63629e-05
		2778	1.50766e-05
		2779.5	1.38711e-05
		2781	1.27433e-05
		2782.5	1.169e-05
		2784	1.0708e-05
		2785.5	9.79405e-06
		2787	8.94496e-06
		2788.5	8.15746e-06
		2790	7.42833e-06
		2791.5	6.75441e-06
		2793	6.13257e-06
		2794.5	5.55977e-06
		2796	5.03303e-06
		2797.5	4.54946e-06
		2799	4.10627e-06
		2800.5	3.70078e-06
		2802	3.3304e-06
		2803.5	2.99264e-06
		2805	2.68516e-06
		2806.5	2.4057e-06
		2808	2.15213e-06
		2809.5	1.92244e-06
		2811	1.71471e-06
		2812.5	1.52715e-06
		2814	1.3581e-06
		2815.5	1.20596e-06
		2817	1.06927e-06
		2818.5	9.4667e-07
		2820	8.36878e-07
		2821.5	7.38719e-07
		2823	6.51103e-07
		2824.5	5.73025e-07
		2826	5.03559e-07
		2827.5	4.41854e-07
		2829	3.87134e-07
		2830.5	3.38684e-07
		2832	2.95857e-07
		2833.5	2.58059e-07
		2835	2.24755e-07
		2836.5	1.95458e-07
		2838	1.69725e-07
		2839.5	1.47161e-07
		2841	1.27406e-07
		2842.5	1.10138e-07
		2844	9.50685e-08
		2845.5	8.19384e-08
		2847	7.05163e-08
		2848.5	6.05958e-08
		2850	5.19932e-08
		2851.5	4.45452e-08
		2853	3.81072e-08
		2854.5	2.51552e-08
		2856	2.14581e-08
		2857.5	1.82763e-08
		2859	1.55424e-08
		2860.5	1.31972e-08
		2862	1.11886e-08
		2863.5	9.47122e-09
		2865	0
		2866.5	0
		2868	0
		2869.5	0
		2871	0
		2872.5	0
		2874	0
		2875.5	0
		2877	0
		2878.5	0
		2880	0
		2881.5	0
		2883	0
		2884.5	0
		2886	0
		2887.5	0
		2889	0
		2890.5	0
		2892	0
		2893.5	0
		2895	0
		2896.5	0
		2898	0
		2899.5	0
		2901	0
		2902.5	0
		2904	0
		2905.5	0
		2907	0
		2908.5	0
		2910	0
		2911.5	0
		2913	0
		2914.5	0
		2916	0
		2917.5	0
		2919	0
		2920.5	0
		2922	0
		2923.5	0
		2925	0
		2926.5	0
		2928	0
		2929.5	0
		2931	0
		2932.5	0
		2934	0
		2935.5	0
		2937	0
		2938.5	0
		2940	0
		2941.5	0
		2943	0
		2944.5	0
		2946	0
		2947.5	0
		2949	0
		2950.5	0
		2952	0
		2953.5	0
		2955	0
		2956.5	0
		2958	0
		2959.5	0
		2961	0
		2962.5	0
		2964	0
		2965.5	0
		2967	0
		2968.5	0
		2970	0
		2971.5	0
		2973	0
		2974.5	0
		2976	0
		2977.5	0
		2979	0
		2980.5	0
		2982	0
		2983.5	0
		2985	0
		2986.5	0
		2988	0
		2989.5	0
		2991	0
		2992.5	0
		2994	0
		2995.5	0
		2997	0
		2998.5	0
[truncated: 1 more rows]

## Sheet: PlotDat6
Source sheet	Sheet3	-200	3.4329e-08	40	0	-200	0
Plot name	ProbDens2	-193.529	3.67288e-08	80	0	1993.53	0
Plot Type	16	-187.059	3.92812e-08	80	16
1st free col	9	-180.588	4.19947e-08	40	16
Sigma Level	1	-174.118	4.48782e-08	40	0
Absolute Errs	TRUE	-167.647	4.79412e-08	ErrBox	ErrBox
Symbol Type	1	-161.176	5.11933e-08	200	0
Inverse Plot	FALSE	-154.706	5.46449e-08	240	0
Color Plot	TRUE	-148.235	5.83066e-08	240	1
3D plot	FALSE	-141.765	6.21896e-08	200	1
Linear	FALSE	-135.294	6.63054e-08	200	0
Data Range	V4:W122	-128.824	7.06663e-08	ErrBox	ErrBox
Filled Symbols	FALSE	-122.353	7.52848e-08	240	0
ConcAge	FALSE	-115.882	8.0174e-08	280	0
ConcSwap	FALSE	-109.412	8.53477e-08	280	8
1st Symbol-row	1	-102.941	9.08201e-08	240	8
		-96.4706	9.66059e-08	240	0
		-90	1.0272e-07	ErrBox	ErrBox
		-83.5294	1.0918e-07	280	0
		-77.0588	1.16e-07	320	0
		-70.5882	1.23199e-07	320	5
		-64.1176	1.30794e-07	280	5
		-57.6471	1.38803e-07	280	0
		-51.1765	1.47246e-07	ErrBox	ErrBox
		-44.7059	1.56141e-07	320	0
		-38.2353	1.6551e-07	360	0
		-31.7647	1.75373e-07	360	3
		-25.2941	1.85752e-07	320	3
		-18.8235	1.96669e-07	320	0
		-12.3529	2.08147e-07	ErrBox	ErrBox
		-5.88235	2.20209e-07	360	0
		0.588235	2.3288e-07	400	0
		7.05882	2.46184e-07	400	4
		13.5294	2.60148e-07	360	4
		20	2.74798e-07	360	0
		26.4706	2.9016e-07	ErrBox	ErrBox
		32.9412	3.06262e-07	400	0
		39.4118	1.19231e-06	440	0
		45.8824	0.00964541	440	4
		52.3529	0.00917421	400	4
		58.8235	0.002154	400	0
		65.2941	0.00562799	ErrBox	ErrBox
		71.7647	1.95323e-06	440	0
		78.2353	0.00189093	480	0
		84.7059	3.01653e-05	480	8
		91.1765	4.8935e-07	440	8
		97.6471	5.14508e-07	440	0
		104.118	5.4075e-07	ErrBox	ErrBox
		110.588	5.6811e-07	480	0
		117.059	5.96623e-07	520	0
		123.529	6.26324e-07	520	4
		130	6.57249e-07	480	4
		136.471	6.89434e-07	480	0
		142.941	7.22915e-07	ErrBox	ErrBox
		149.412	7.57728e-07	520	0
		155.882	7.9391e-07	560	0
		162.353	8.31497e-07	560	2
		168.824	8.70527e-07	520	2
		175.294	9.21905e-07	520	0
		181.765	9.65712e-07	ErrBox	ErrBox
		188.235	1.01134e-06	560	0
		194.706	1.05887e-06	600	0
		201.176	1.10837e-06	600	4
		207.647	1.15992e-06	560	4
		214.118	1.21363e-06	560	0
		220.588	1.28452e-06	ErrBox	ErrBox
		227.059	3.5509e-05	600	0
		233.529	0.00111687	640	0
		240	0.00089302	640	6
		246.471	0.00120263	600	6
		252.941	0.00175295	600	0
		259.412	0.0019343	ErrBox	ErrBox
		265.882	0.00178038	640	0
		272.353	0.00285376	680	0
		278.824	0.00317817	680	4
		285.294	0.00160661	640	4
		291.765	0.000176015	640	0
		298.235	0.00169806	ErrBox	ErrBox
		304.706	0.0023302	680	0
		311.176	0.00228277	720	0
		317.647	0.000147822	720	2
		324.118	2.55944e-05	680	2
		330.588	0.000413942	680	0
		337.059	0.00104567	ErrBox	ErrBox
		343.529	0.000846141	720	0
		350	0.00117975	760	0
		356.471	0.00114026	760	5
		362.941	0.00130657	720	5
		369.412	0.0015843	720	0
		375.882	0.00059839	ErrBox	ErrBox
		382.353	0.000194429	760	0
		388.824	0.000872787	800	0
		395.294	0.00137616	800	3
		401.765	0.000872903	760	3
		408.235	0.000591314	760	0
		414.706	0.000642708	ErrBox	ErrBox
		421.176	0.000554794	800	0
		427.647	0.00101391	840	0
		434.118	0.00228086	840	5
		440.588	0.00257437	800	5
		447.059	0.00197888	800	0
		453.529	0.0019727	ErrBox	ErrBox
		460	0.00164577	840	0
		466.471	0.00162802	880	0
		472.941	0.00282291	880	4
		479.412	0.00266819	840	4
		485.882	0.00182208	840	0
		492.353	0.00179268	ErrBox	ErrBox
		498.824	0.00108665	880	0
		505.294	0.000492019	920	0
		511.765	0.000455089	920	2
		518.235	0.000525759	880	2
		524.706	0.000612376	880	0
		531.176	0.000729448	ErrBox	ErrBox
		537.647	0.000776402	920	0
		544.118	0.000661327	960	0
		550.588	0.000635875	960	2
		557.059	0.000974608	920	2
		563.529	0.00133478	920	0
		570	0.00124603	ErrBox	ErrBox
		576.471	0.000882295	960	0
		582.941	0.000694309	1000	0
		589.412	0.00062461	1000	1
		595.882	0.000543037	960	1
		602.353	0.000882235	960	0
		608.824	0.00123544	ErrBox	ErrBox
		615.294	0.00113908
		621.765	0.00119687
		628.235	0.00160878
		634.706	0.00166581
		641.176	0.00142643
		647.647	0.00136174
		654.118	0.0018052
		660.588	0.00203614
		667.059	0.00143121
		673.529	0.000764438
		680	0.000786633
		686.471	0.00123392
		692.941	0.00106897
		699.412	0.000447703
		705.882	0.000160624
		712.353	0.000193351
		718.824	0.000434944
		725.294	0.000955028
		731.765	0.0016792
		738.235	0.00204388
		744.706	0.00159239
		751.176	0.000919166
		757.647	0.000603876
		764.118	0.000543553
		770.588	0.000558774
		777.059	0.000627955
		783.529	0.000791875
		790	0.00104209
		796.471	0.00132032
		802.941	0.00156567
		809.412	0.00155206
		815.882	0.00121149
		822.353	0.000978943
		828.824	0.00100292
		835.294	0.0010734
		841.765	0.00106591
		848.235	0.000964337
		854.706	0.000854208
		861.176	0.000864955
		867.647	0.000961151
		874.118	0.000947528
		880.588	0.000759285
		887.059	0.000543503
		893.529	0.000432666
		900	0.000428093
		906.471	0.000481675
		912.941	0.000559678
		919.412	0.000626701
		925.882	0.000632359
		932.353	0.00054976
		938.824	0.000412314
		945.294	0.000285234
		951.765	0.000207582
		958.235	0.000176321
		964.706	0.000170778
		971.176	0.000174435
		977.647	0.000178952
		984.118	0.000180656
		990.588	0.000177859
		997.059	0.000169941
		1003.53	0.000157186
		1010	0.000140639
		1016.47	0.000121836
		1022.94	0.00010247
		1029.41	8.40664e-05
		1035.88	6.77588e-05
		1042.35	5.4183e-05
		1048.82	4.35017e-05
		1055.29	3.55125e-05
		1061.76	2.97924e-05
		1068.24	2.5827e-05
		1074.71	2.31463e-05
		1081.18	2.13263e-05
		1087.65	2.00566e-05
		1094.12	1.91208e-05
		1100.59	1.83793e-05
		1107.06	1.77478e-05
		1113.53	1.71789e-05
		1120	1.66473e-05
		1126.47	1.61357e-05
		1132.94	1.56509e-05
		1139.41	1.51803e-05
		1145.88	1.47239e-05
		1152.35	1.42817e-05
		1158.82	1.38536e-05
		1165.29	1.34393e-05
		1171.76	1.30385e-05
		1178.24	1.26511e-05
		1184.71	1.22766e-05
		1191.18	1.19149e-05
		1197.65	1.15654e-05
		1204.12	1.12278e-05
		1210.59	1.09018e-05
		1217.06	1.05868e-05
		1223.53	1.02826e-05
		1230	9.98855e-06
		1236.47	9.7044e-06
		1242.94	9.42966e-06
		1249.41	9.16392e-06
		1255.88	8.90679e-06
		1262.35	8.65785e-06
		1268.82	8.41671e-06
		1275.29	8.18301e-06
		1281.76	7.95639e-06
		1288.24	7.73648e-06
		1294.71	7.52297e-06
		1301.18	7.31553e-06
		1307.65	7.11387e-06
		1314.12	6.91771e-06
		1320.59	6.72678e-06
		1327.06	6.54083e-06
		1333.53	6.35962e-06
		1340	6.18295e-06
		1346.47	6.01061e-06
		1352.94	5.84242e-06
		1359.41	5.67821e-06
		1365.88	5.51781e-06
		1372.35	5.36108e-06
		1378.82	5.2079e-06
		1385.29	5.05813e-06
		1391.76	4.91168e-06
		1398.24	4.76844e-06
		1404.71	4.62833e-06
		1411.18	4.49125e-06
		1417.65	4.35714e-06
		1424.12	4.22593e-06
		1430.59	4.09756e-06
		1437.06	3.97198e-06
		1443.53	3.84913e-06
		1450	3.72897e-06
		1456.47	3.61146e-06
		1462.94	3.49656e-06
		1469.41	3.38424e-06
		1475.88	3.27446e-06
		1482.35	3.1672e-06
		1488.82	3.06242e-06
		1495.29	2.9506e-06
		1501.76	2.85208e-06
		1508.24	2.75578e-06
		1514.71	2.66169e-06
		1521.18	2.56983e-06
		1527.65	2.48017e-06
		1534.12	2.39271e-06
		1540.59	2.30745e-06
		1547.06	2.22436e-06
		1553.53	2.14343e-06
		1560	2.06464e-06
		1566.47	1.98798e-06
		1572.94	1.91343e-06
		1579.41	1.84095e-06
		1585.88	1.77054e-06
		1592.35	1.70216e-06
		1598.82	1.63579e-06
		1605.29	1.57139e-06
		1611.76	1.50895e-06
		1618.24	1.44842e-06
		1624.71	1.38979e-06
		1631.18	1.33301e-06
		1637.65	1.27806e-06
		1644.12	1.22489e-06
		1650.59	1.17348e-06
		1657.06	1.1238e-06
		1663.53	1.0758e-06
		1670	1.02945e-06
		1676.47	9.84722e-07
		1682.94	9.41568e-07
		1689.41	8.99957e-07
		1695.88	8.59852e-07
		1702.35	8.21215e-07
		1708.82	7.84011e-07
		1715.29	7.48202e-07
		1721.76	7.13752e-07
		1728.24	6.80624e-07
		1734.71	6.48783e-07
		1741.18	6.18191e-07
		1747.65	5.88814e-07
		1754.12	5.60615e-07
		1760.59	5.3356e-07
		1767.06	5.07614e-07
		1773.53	4.82743e-07
		1780	4.58912e-07
		1786.47	4.36089e-07
		1792.94	4.1424e-07
		1799.41	3.93334e-07
		1805.88	3.73338e-07
		1812.35	3.54221e-07
		1818.82	3.35952e-07
		1825.29	3.18503e-07
		1831.76	3.01843e-07
		1838.24	2.85943e-07
		1844.71	2.70776e-07
		1851.18	2.56314e-07
		1857.65	2.42531e-07
		1864.12	2.294e-07
		1870.59	2.16895e-07
		1877.06	2.04993e-07
		1883.53	1.93669e-07
		1890	1.829e-07
		1896.47	1.72662e-07
		1902.94	1.62935e-07
		1909.41	1.53695e-07
		1915.88	1.44924e-07
		1922.35	1.366e-07
		1928.82	1.28705e-07
		1935.29	1.21218e-07
		1941.76	1.14123e-07
		1948.24	1.07402e-07
		1954.71	1.01037e-07
		1961.18	9.5013e-08
		1967.65	8.93133e-08
		1974.12	8.3923e-08
		1980.59	7.88274e-08
		1987.06	7.40125e-08
		1993.53	6.94648e-08
		IsoLine	IsoLine

[truncated: 13 more sheets: PlotDat9, PlotDat15, PlotDat18, PlotDat23, PlotDat25, PlotDat7, PlotDat12, PlotDat16, PlotDat21, PlotDat20, PlotDat24, PlotDat11, PlotDat10]
